# Supplementary material
Source: publisher site journal article supplement (https://www.spandidos-publications.com/1892/downloadSupplementary)
Supplement: Supplementary file 1 [file downloadSupplementary]

## Sheet: 8230 pairs DE miRNA-mRNA target
miRNA id	ENTREZ GENE ID	Gene description
mmu-miR-124-5p	664883	PREDICTED: RNA-binding protein Nova-1 [Dasypus novemcinctus]
mmu-miR-124-5p	380842	stathmin domain-containing protein 1 [Mus musculus]
mmu-miR-124-5p	320226	coiled-coil domain-containing protein 171 [Mus musculus]
mmu-miR-124-5p	269470	WD repeat domain 3, isoform CRA_c, partial [Mus musculus]
mmu-miR-124-5p	269181	-
mmu-miR-124-5p	269181	-
mmu-miR-124-5p	258438	olfactory receptor 215 [Mus musculus]
mmu-miR-124-5p	258019	olfactory receptor 212 [Mus musculus]
mmu-miR-124-5p	245945	-
mmu-miR-124-5p	244198	PREDICTED: olfactomedin-like protein 1 [Peromyscus maniculatus bairdii]
mmu-miR-124-5p	243912	heat shock protein beta-6 [Mus musculus]
mmu-miR-124-5p	242466	zinc finger protein 462 [Mus musculus]
mmu-miR-124-5p	235559	mKIAA0259 protein [Mus musculus]
mmu-miR-124-5p	234371	transmembrane protein 161A isoform 1 precursor [Mus musculus]
mmu-miR-124-5p	234356	chondroitin sulfate N-acetylgalactosaminyltransferase 1 [Mus musculus]
mmu-miR-124-5p	234356	chondroitin sulfate N-acetylgalactosaminyltransferase 1 [Mus musculus]
mmu-miR-124-5p	227682	probable tRNA pseudouridine synthase 2 isoform c [Mus musculus]
mmu-miR-124-5p	227682	probable tRNA pseudouridine synthase 2 isoform a [Mus musculus]
mmu-miR-124-5p	227682	probable tRNA pseudouridine synthase 2 isoform c [Mus musculus]
mmu-miR-124-5p	227682	probable tRNA pseudouridine synthase 2 isoform a [Mus musculus]
mmu-miR-124-5p	226243	hyaluronan-binding protein 2 precursor [Mus musculus]
mmu-miR-124-5p	212933	probable carboxypeptidase PM20D1 precursor [Mus musculus]
mmu-miR-124-5p	208228	MOB kinase activator 3A [Mus musculus]
mmu-miR-124-5p	116701	fibroblast growth factor receptor-like 1 isoform 2 precursor [Mus musculus]
mmu-miR-124-5p	108075	-
mmu-miR-124-5p	105835	RUN and TBC1 domain containing 3, isoform CRA_b, partial [Mus musculus]
mmu-miR-124-5p	103583	-
mmu-miR-124-5p	103583	-
mmu-miR-124-5p	103583	-
mmu-miR-124-5p	103583	-
mmu-miR-124-5p	100609	probable 28S rRNA (cytosine-C(5))-methyltransferase [Mus musculus]
mmu-miR-124-5p	81601	HIV-1 tat interactive protein, homolog (human), isoform CRA_d, partial [Mus musculus]
mmu-miR-124-5p	78610	unnamed protein product [Mus musculus]
mmu-miR-124-5p	78110	-
mmu-miR-124-5p	73251	mKIAA1717 protein [Mus musculus]
mmu-miR-124-5p	72113	uncharacterized aarF domain-containing protein kinase 1 precursor [Mus musculus]
mmu-miR-124-5p	72113	uncharacterized aarF domain-containing protein kinase 1 precursor [Mus musculus]
mmu-miR-124-5p	72113	uncharacterized aarF domain-containing protein kinase 1 precursor [Mus musculus]
mmu-miR-124-5p	71971	zinc finger, SWIM domain containing 1, isoform CRA_a, partial [Mus musculus]
mmu-miR-124-5p	70999	unnamed protein product [Mus musculus]
mmu-miR-124-5p	70762	serine/threonine-protein kinase DCLK2 isoform 2 [Mus musculus]
mmu-miR-124-5p	70762	serine/threonine-protein kinase DCLK2 isoform 5 [Mus musculus]
mmu-miR-124-5p	70762	serine/threonine-protein kinase DCLK2 isoform 4 [Mus musculus]
mmu-miR-124-5p	70762	serine/threonine-protein kinase DCLK2 isoform 3 [Mus musculus]
mmu-miR-124-5p	70762	serine/threonine-protein kinase DCLK2 isoform 1 [Mus musculus]
mmu-miR-124-5p	70417	multiple epidermal growth factor-like domains protein 10 precursor [Mus musculus]
mmu-miR-124-5p	70100	unnamed protein product [Mus musculus]
mmu-miR-124-5p	70008	angiotensin-converting enzyme 2 precursor [Mus musculus]
mmu-miR-124-5p	69709	RIKEN cDNA 4833439L19, isoform CRA_c, partial [Mus musculus]
mmu-miR-124-5p	69635	death-associated protein kinase 1 isoform 2 [Mus musculus]
mmu-miR-124-5p	69635	death-associated protein kinase 1 isoform 2 [Mus musculus]
mmu-miR-124-5p	69635	death-associated protein kinase 1 isoform 2 [Mus musculus]
mmu-miR-124-5p	68794	-
mmu-miR-124-5p	68794	-
mmu-miR-124-5p	68767	unnamed protein product [Mus musculus]
mmu-miR-124-5p	66341	EP300-interacting inhibitor of differentiation 3 [Mus musculus]
mmu-miR-124-5p	56376	ENH3 [Mus musculus]
mmu-miR-124-5p	56376	PDZ and LIM domain protein 5 isoform ENH2 [Mus musculus]
mmu-miR-124-5p	56376	PDZ and LIM domain protein 5 isoform ENH3a [Mus musculus]
mmu-miR-124-5p	56376	PDZ and LIM domain protein 5 isoform ENH4 [Mus musculus]
mmu-miR-124-5p	55992	PREDICTED: tripartite motif-containing protein 3 isoform X4 [Cricetulus griseus]
mmu-miR-124-5p	55992	tripartite motif-containing protein 3 isoform b [Mus musculus]
mmu-miR-124-5p	55992	PREDICTED: tripartite motif-containing protein 3 isoform X4 [Cricetulus griseus]
mmu-miR-124-5p	55992	PREDICTED: tripartite motif-containing protein 3 isoform X4 [Cricetulus griseus]
mmu-miR-124-5p	55944	eukaryotic translation initiation factor 3, subunit 7 (zeta), isoform CRA_c, partial [Mus musculus]
mmu-miR-124-5p	54326	elongation of very long chain fatty acids (FEN1/Elo2, SUR4/Elo3, yeast)-like 2, isoform CRA_a, partial [Mus musculus]
mmu-miR-124-5p	53313	sarcoplasmic/endoplasmic reticulum calcium ATPase 3 isoform b [Mus musculus]
mmu-miR-124-5p	53313	sarcoplasmic/endoplasmic reticulum calcium ATPase 3 isoform c [Mus musculus]
mmu-miR-124-5p	53313	PREDICTED: sarcoplasmic/endoplasmic reticulum calcium ATPase 3 isoform X1 [Rattus norvegicus]
mmu-miR-124-5p	50779	-
mmu-miR-124-5p	50779	-
mmu-miR-124-5p	26401	mitogen-activated protein kinase kinase kinase 1 [Mus musculus]
mmu-miR-124-5p	21453	Treacher Collins Franceschetti syndrome 1, homolog, isoform CRA_f [Mus musculus]
mmu-miR-124-5p	21453	Treacher Collins Franceschetti syndrome 1, homolog, isoform CRA_c [Mus musculus]
mmu-miR-124-5p	21406	transcription factor 12 isoform 4 [Mus musculus]
mmu-miR-124-5p	21406	PREDICTED: transcription factor 12 isoform X9 [Mus musculus]
mmu-miR-124-5p	21406	PREDICTED: transcription factor 12 isoform X9 [Rattus norvegicus]
mmu-miR-124-5p	20650	beta-2-syntrophin [Mus musculus]
mmu-miR-124-5p	20564	-
mmu-miR-124-5p	20383	PREDICTED: serine/arginine-rich splicing factor 3 isoform X1 [Myotis lucifugus]
mmu-miR-124-5p	20383	Serine/arginine-rich splicing factor 3 [Myotis brandtii]
mmu-miR-124-5p	17885	-
mmu-miR-124-5p	17884	myosin-4 [Mus musculus]
mmu-miR-124-5p	17882	myosin-2 [Mus musculus]
mmu-miR-124-5p	17879	myosin-1 [Mus musculus]
mmu-miR-124-5p	17831	mucin-2 precursor [Mus musculus]
mmu-miR-124-5p	16549	mCG140911, isoform CRA_b, partial [Mus musculus]
mmu-miR-124-5p	14725	low-density lipoprotein receptor-related protein 2 precursor [Mus musculus]
mmu-miR-124-5p	14583	glutamine--fructose-6-phosphate aminotransferase [isomerizing] 1 [Mus musculus]
mmu-miR-124-5p	14119	fibrillin-2 precursor [Mus musculus]
mmu-miR-124-5p	14118	PREDICTED: fibrillin-1 isoform X2 [Mus musculus]
mmu-miR-124-5p	13972	PREDICTED: guanine nucleotide-binding protein subunit beta-like protein 1 isoform X2 [Cricetulus griseus]
mmu-miR-124-5p	13531	ubiquitin carboxyl-terminal hydrolase 17-like protein A [Mus musculus]
mmu-miR-124-5p	13495	developmentally-regulated GTP-binding protein 2 [Mus musculus]
mmu-miR-124-5p	12211	PREDICTED: baculoviral IAP repeat-containing protein 6 isoform X6 [Mus musculus]
mmu-miR-124-5p	12153	PREDICTED: bone morphogenetic protein 1 isoform X3 [Ovis aries]
mmu-miR-124-5p	12153	bone morphogenetic protein 1 precursor [Mus musculus]
mmu-miR-124-5p	11846	-
mmu-miR-124-5p	11532	alcohol dehydrogenase class-3 isoform 1 [Mus musculus]
mmu-miR-124-5p	11532	alcohol dehydrogenase class-3 isoform 1 [Mus musculus]
mmu-miR-122-3p	101488212	protein EVI2B precursor [Mus musculus]
mmu-miR-122-3p	100502698	mKIAA0226 protein [Mus musculus]
mmu-miR-122-3p	100041151	-
mmu-miR-122-3p	668178	UbiE3 protein [Mus musculus]
mmu-miR-122-3p	383787	ankyrin repeat domain-containing protein 63 [Mus musculus]
mmu-miR-122-3p	382793	metaxin-3 [Mus musculus]
mmu-miR-122-3p	381284	ciliary rootlet coiled-coil, rootletin family member 2 [Mus musculus]
mmu-miR-122-3p	353282	scm-like with four MBT domains protein 2 isoform 2 [Mus musculus]
mmu-miR-122-3p	320534	mCG6601, isoform CRA_c, partial [Mus musculus]
mmu-miR-122-3p	319901	dermatan-sulfate epimerase-like protein precursor [Mus musculus]
mmu-miR-122-3p	319845	RIKEN cDNA E130103I17, isoform CRA_b, partial [Mus musculus]
mmu-miR-122-3p	319722	hypothetical protein [Plasmodium berghei strain ANKA], partial [Plasmodium berghei ANKA]
mmu-miR-122-3p	319702	-
mmu-miR-122-3p	270091	leucine-rich repeat-containing protein 36 isoform 2 [Mus musculus]
mmu-miR-122-3p	270091	leucine-rich repeat-containing protein 36 isoform 3 [Mus musculus]
mmu-miR-122-3p	268782	alanine--glyoxylate aminotransferase 2, mitochondrial isoform 2 [Mus musculus]
mmu-miR-122-3p	268319	mCG148085 [Mus musculus]
mmu-miR-122-3p	263803	serine/threonine-protein kinase N3 [Mus musculus]
mmu-miR-122-3p	258173	olfactory receptor 708 [Mus musculus]
mmu-miR-122-3p	243362	serologically defined colon cancer antigen 13, isoform CRA_b, partial [Mus musculus]
mmu-miR-122-3p	242384	leucine-rich repeat and immunoglobulin-like domain-containing nogo receptor-interacting protein 2 precursor [Mus musculus]
mmu-miR-122-3p	237500	transmembrane and TPR repeat-containing protein 3 isoform 2 [Mus musculus]
mmu-miR-122-3p	235472	-
mmu-miR-122-3p	234267	neuronal membrane glycoprotein M6-a isoform 1 [Mus musculus]
mmu-miR-122-3p	231821	arf-GAP with dual PH domain-containing protein 1 [Mus musculus]
mmu-miR-122-3p	224671	BTB/POZ domain-containing protein 9 [Mus musculus]
mmu-miR-122-3p	218138	GDP-mannose 4,6 dehydratase [Mus musculus]
mmu-miR-122-3p	217463	sorting nexin 13, isoform CRA_b, partial [Mus musculus]
mmu-miR-122-3p	210417	thrombospondin type-1 domain-containing protein 7B precursor [Mus musculus]
mmu-miR-122-3p	208158	unnamed protein product [Mus musculus]
mmu-miR-122-3p	192195	histone-lysine N-methyltransferase ASH1L [Mus musculus]
mmu-miR-122-3p	140570	plexin-B2 precursor [Mus musculus]
mmu-miR-122-3p	108946	zinc finger, ZZ domain containing 3, isoform CRA_b, partial [Mus musculus]
mmu-miR-122-3p	108101	-
mmu-miR-122-3p	107568	NEDD4-like E3 ubiquitin-protein ligase WWP1 isoform 2 [Mus musculus]
mmu-miR-122-3p	107372	unnamed protein product [Mus musculus]
mmu-miR-122-3p	107029	PREDICTED: NAD-dependent malic enzyme, mitochondrial isoform X1 [Mus musculus]
mmu-miR-122-3p	106529	mCG11048, isoform CRA_b, partial [Mus musculus]
mmu-miR-122-3p	104271	testis-expressed sequence 15 protein [Mus musculus]
mmu-miR-122-3p	83408	immunity-associated nucleotide 4 [Mus musculus]
mmu-miR-122-3p	79362	class E basic helix-loop-helix protein 41 isoform 1 [Mus musculus]
mmu-miR-122-3p	79362	class E basic helix-loop-helix protein 41 isoform 1 [Mus musculus]
mmu-miR-122-3p	77065	integrator complex subunit 7, isoform CRA_c, partial [Mus musculus]
mmu-miR-122-3p	77044	AT-rich interactive domain-containing protein 2 [Mus musculus]
mmu-miR-122-3p	74741	RIKEN cDNA 5730419I09, isoform CRA_b, partial [Mus musculus]
mmu-miR-122-3p	72925	PREDICTED: E3 ubiquitin-protein ligase MARCH1 isoform X4 [Mus musculus]
mmu-miR-122-3p	72805	zinc finger protein 839 isoform 1 [Mus musculus]
mmu-miR-122-3p	72552	PREDICTED: inactive hydroxysteroid dehydrogenase-like protein 1 isoform X3 [Mus musculus]
mmu-miR-122-3p	71877	-
mmu-miR-122-3p	71797	carbohydrate sulfotransferase 13 precursor [Mus musculus]
mmu-miR-122-3p	71481	alpha-protein kinase 1 [Mus musculus]
mmu-miR-122-3p	71323	ras association domain-containing protein 8 [Mus musculus]
mmu-miR-122-3p	71301	-
mmu-miR-122-3p	69964	-
mmu-miR-122-3p	69962	histidine protein methyltransferase 1 homolog [Mus musculus]
mmu-miR-122-3p	69727	ubiquitin carboxyl-terminal hydrolase 46 [Mus musculus]
mmu-miR-122-3p	68119	CKLF-like MARVEL transmembrane domain-containing protein 3 [Mus musculus]
mmu-miR-122-3p	67894	PREDICTED: protein FAM45A isoform X2 [Mus musculus]
mmu-miR-122-3p	66873	TLR4 interactor with leucine rich repeats precursor [Mus musculus]
mmu-miR-122-3p	56318	acid phosphatase, prostate, isoform CRA_b, partial [Mus musculus]
mmu-miR-122-3p	56046	RIKEN cDNA 2410003P15, isoform CRA_d, partial [Mus musculus]
mmu-miR-122-3p	54375	antizyme inhibitor 1 isoform 1 [Mus musculus]
mmu-miR-122-3p	54375	antizyme inhibitor 1 isoform 1 [Mus musculus]
mmu-miR-122-3p	50758	F-box/LRR-repeat protein 17 [Mus musculus]
mmu-miR-122-3p	30056	translocase of inner mitochondrial membrane 9 homolog (yeast), isoform CRA_b, partial [Mus musculus]
mmu-miR-122-3p	30056	translocase of inner mitochondrial membrane 9 homolog (yeast), isoform CRA_b, partial [Mus musculus]
mmu-miR-122-3p	29849	olfactory receptor 159 [Mus musculus]
mmu-miR-122-3p	22288	utrophin [Mus musculus]
mmu-miR-122-3p	22196	mCG17660, isoform CRA_c, partial [Mus musculus]
mmu-miR-122-3p	22026	type II zinc finger DNA binding transcription factor [Mus sp.]
mmu-miR-122-3p	20555	schlafen 1 [Mus musculus]
mmu-miR-122-3p	20493	sodium/bile acid cotransporter isoform 1 [Mus musculus]
mmu-miR-122-3p	20318	stromal cell derived factor 4, isoform CRA_b, partial [Mus musculus]
mmu-miR-122-3p	20230	DNA-binding protein SATB1 [Mus musculus]
mmu-miR-122-3p	19684	radixin, partial [Mus musculus]
mmu-miR-122-3p	19221	prostaglandin F2 receptor negative regulator, partial [Mus musculus]
mmu-miR-122-3p	18578	cAMP-specific 3',5'-cyclic phosphodiesterase 4B isoform 1 [Mus musculus]
mmu-miR-122-3p	18491	-
mmu-miR-122-3p	18440	P2X purinoceptor 6 isoform 1 [Mus musculus]
mmu-miR-122-3p	18126	-
mmu-miR-122-3p	18115	-
mmu-miR-122-3p	17385	stromelysin-3 preproprotein [Mus musculus]
mmu-miR-122-3p	17126	-
mmu-miR-122-3p	16785	PREDICTED: 40S ribosomal protein SA isoform X1 [Nomascus leucogenys]
mmu-miR-122-3p	16563	kinesin-like protein KIF2A isoform 2 [Mus musculus]
mmu-miR-122-3p	16536	potassium voltage-gated channel subfamily KQT member 2 isoform 1 [Mus musculus]
mmu-miR-122-3p	16519	potassium inwardly-rectifying channel, subfamily J, member 3 [Camelus ferus]
mmu-miR-122-3p	16517	inward rectifier potassium channel 16 [Mus musculus]
mmu-miR-122-3p	15245	hedgehog-interacting protein precursor [Mus musculus]
mmu-miR-122-3p	14211	-
mmu-miR-122-3p	14007	-
mmu-miR-122-3p	13717	-
mmu-miR-122-3p	13194	DNA damage-binding protein 1 [Mus musculus]
mmu-miR-122-3p	13003	mCG116562, isoform CRA_c, partial [Mus musculus]
mmu-miR-122-3p	12773	-
mmu-miR-122-3p	12571	-
mmu-miR-122-3p	11977	ATPase, Cu++ transporting, alpha polypeptide, isoform CRA_b, partial [Mus musculus]
mmu-miR-122-3p	11907	arginyl-tRNA--protein transferase 1 isoform 3 [Mus musculus]
mmu-miR-122-3p	11669	aldehyde dehydrogenase, mitochondrial isoform 1 precursor [Mus musculus]
mmu-miR-122-3p	11515	adenylate cyclase type 9 isoform 1 [Mus musculus]
mmu-miR-124-3p	100040766	maestro heat-like repeat-containing protein family member 2A [Mus musculus]
mmu-miR-124-3p	630579	zinc finger protein 80 [Mus musculus]
mmu-miR-124-3p	432940	-
mmu-miR-124-3p	259144	olfactory receptor 456 [Mus musculus]
mmu-miR-124-3p	235469	-
mmu-miR-124-3p	235086	-
mmu-miR-124-3p	235086	protein turtle homolog B isoform 1 precursor [Mus musculus]
mmu-miR-124-3p	235086	protein turtle homolog B isoform 2 precursor [Mus musculus]
mmu-miR-124-3p	232878	zinc finger and SCAN domain-containing protein 22 isoform b [Mus musculus]
mmu-miR-124-3p	232878	zinc finger and SCAN domain-containing protein 22 isoform b [Mus musculus]
mmu-miR-124-3p	232878	zinc finger and SCAN domain-containing protein 22 isoform b [Mus musculus]
mmu-miR-124-3p	232878	zinc finger and SCAN domain-containing protein 22 isoform a [Mus musculus]
mmu-miR-124-3p	232878	zinc finger and SCAN domain-containing protein 22 isoform a [Mus musculus]
mmu-miR-124-3p	232878	zinc finger and SCAN domain-containing protein 22 isoform a [Mus musculus]
mmu-miR-124-3p	232196	uncharacterized protein C2orf42 homolog isoform 1 [Mus musculus]
mmu-miR-124-3p	232196	uncharacterized protein C2orf42 homolog isoform 2 [Mus musculus]
mmu-miR-124-3p	231630	adenosine monophosphate-protein transferase FICD [Mus musculus]
mmu-miR-124-3p	226781	zinc transporter 10 [Mus musculus]
mmu-miR-124-3p	223604	potassium channel subfamily K member 9 [Mus musculus]
mmu-miR-124-3p	216850	lysine-specific demethylase 6B [Mus musculus]
mmu-miR-124-3p	216443	methionine--tRNA ligase, cytoplasmic isoform 1 [Mus musculus]
mmu-miR-124-3p	216443	methionine--tRNA ligase, cytoplasmic isoform 2 [Mus musculus]
mmu-miR-124-3p	215615	aminopeptidase B isoform 2 [Mus musculus]
mmu-miR-124-3p	213012	abhydrolase domain containing 10, isoform CRA_c [Mus musculus]
mmu-miR-124-3p	140571	plexin-B3 precursor [Mus musculus]
mmu-miR-124-3p	111175	peroxisomal trans-2-enoyl-CoA reductase [Mus musculus]
mmu-miR-124-3p	104681	monocarboxylate transporter 7 isoform a [Mus musculus]
mmu-miR-124-3p	102323	mCG3700, isoform CRA_e, partial [Mus musculus]
mmu-miR-124-3p	102323	mCG3700, isoform CRA_e, partial [Mus musculus]
mmu-miR-124-3p	102323	DCN1-like protein 2 isoform a [Mus musculus]
mmu-miR-124-3p	101497	mFLJ00018 protein [Mus musculus]
mmu-miR-124-3p	101497	mFLJ00018 protein [Mus musculus]
mmu-miR-124-3p	83493	mKIAA0851 protein [Mus musculus]
mmu-miR-124-3p	83454	nuclear RNA export factor 5 isoform 2 [Mus musculus]
mmu-miR-124-3p	83454	nuclear RNA export factor 2, partial [Mus musculus]
mmu-miR-124-3p	83454	nuclear RNA export factor 5 isoform 1 [Mus musculus]
mmu-miR-124-3p	77877	UPF0489 protein C5orf22 homolog isoform b [Mus musculus]
mmu-miR-124-3p	77877	UPF0489 protein C5orf22 homolog isoform a [Mus musculus]
mmu-miR-124-3p	77128	CREB3 regulatory factor [Mus musculus]
mmu-miR-124-3p	74201	-
mmu-miR-124-3p	74016	PHD finger protein 19 [Mus musculus]
mmu-miR-124-3p	73420	centriole, cilia and spindle-associated protein [Mus musculus]
mmu-miR-124-3p	72672	zinc finger protein 518A [Mus musculus]
mmu-miR-124-3p	68628	F-box/WD repeat-containing protein 9 [Mus musculus]
mmu-miR-124-3p	67800	hypothetical protein [Homo sapiens]
mmu-miR-124-3p	67784	plexin-D1 precursor [Mus musculus]
mmu-miR-124-3p	66881	prenylcysteine oxidase precursor [Mus musculus]
mmu-miR-124-3p	66811	dual oxidase maturation factor 2 [Mus musculus]
mmu-miR-124-3p	66722	-
mmu-miR-124-3p	58240	HS1 binding protein 3, isoform CRA_a, partial [Mus musculus]
mmu-miR-124-3p	57258	exportin-4 [Mus musculus]
mmu-miR-124-3p	54604	pecanex homolog (Drosophila), isoform CRA_b, partial [Mus musculus]
mmu-miR-124-3p	53413	exocyst complex component 7 isoform 1 [Mus musculus]
mmu-miR-124-3p	53413	mKIAA1067 protein [Mus musculus]
mmu-miR-124-3p	52463	methylcytosine dioxygenase TET1 isoform 2 [Mus musculus]
mmu-miR-124-3p	52463	methylcytosine dioxygenase TET1 isoform 1 [Mus musculus]
mmu-miR-124-3p	50493	-
mmu-miR-124-3p	50493	thioredoxin reductase 1, cytoplasmic isoform 1 [Mus musculus]
mmu-miR-124-3p	50493	thioredoxin reductase 1, cytoplasmic isoform 1 [Mus musculus]
mmu-miR-124-3p	50493	-
mmu-miR-124-3p	30841	lysine-specific demethylase 2B isoform 2 [Mus musculus]
mmu-miR-124-3p	30841	lysine-specific demethylase 2B isoform 1 [Mus musculus]
mmu-miR-124-3p	26440	PREDICTED: proteasome subunit alpha type-1 isoform X3 [Nomascus leucogenys]
mmu-miR-124-3p	23828	-
mmu-miR-124-3p	20274	-
mmu-miR-124-3p	20274	-
mmu-miR-124-3p	20130	Harvey rat sarcoma oncogene, subgroup R, partial [Mus musculus]
mmu-miR-124-3p	20103	40S ribosomal protein S5 [Pteropus alecto]
mmu-miR-124-3p	19731	ral guanine nucleotide dissociation stimulator-like 1 [Mus musculus]
mmu-miR-124-3p	19250	tyrosine-protein phosphatase non-receptor type 14 [Mus musculus]
mmu-miR-124-3p	18667	progesterone receptor [Mus musculus]
mmu-miR-124-3p	18457	biogenesis of lysosome-related organelles complex 1 subunit 6 [Mus musculus]
mmu-miR-124-3p	18150	nucleoplasmin-3 [Mus musculus]
mmu-miR-124-3p	18127	nitric oxide synthase, endothelial [Mus musculus]
mmu-miR-124-3p	17283	menin isoform a [Mus musculus]
mmu-miR-124-3p	17283	menin isoform c [Mus musculus]
mmu-miR-124-3p	17283	menin isoform a [Mus musculus]
mmu-miR-124-3p	17283	menin isoform a [Mus musculus]
mmu-miR-124-3p	16210	imprinted and ancient [Mus musculus]
mmu-miR-124-3p	14733	glypican-1 precursor [Mus musculus]
mmu-miR-124-3p	14309	follicle-stimulating hormone receptor precursor [Mus musculus]
mmu-miR-124-3p	14201	PREDICTED: four and a half LIM domains protein 3 isoform X2 [Mus musculus]
mmu-miR-124-3p	14154	unnamed protein product [Mus musculus]
mmu-miR-124-3p	14009	ETS translocation variant 1 isoform a [Mus musculus]
mmu-miR-124-3p	14009	ETS translocation variant 1 isoform b [Mus musculus]
mmu-miR-124-3p	13924	receptor-type tyrosine-protein phosphatase V precursor [Mus musculus]
mmu-miR-124-3p	13805	endoglin isoform 1 precursor [Mus musculus]
mmu-miR-124-3p	13805	endoglin isoform 2 precursor [Mus musculus]
mmu-miR-124-3p	13805	endoglin isoform 3 precursor [Mus musculus]
mmu-miR-124-3p	13661	ets homologous factor, isoform CRA_d, partial [Mus musculus]
mmu-miR-124-3p	13340	equilibrative nucleoside transporter 2 [Mus musculus]
mmu-miR-124-3p	13191	dynactin subunit 1 isoform 1 [Mus musculus]
mmu-miR-124-3p	13191	PREDICTED: dynactin subunit 1 isoform X7 [Mus musculus]
mmu-miR-124-3p	13191	dynactin subunit 1 isoform 1 [Mus musculus]
mmu-miR-124-3p	12350	carbonic anhydrase 3 [Mus musculus]
mmu-miR-124-3p	12042	unnamed protein product [Mus musculus]
mmu-miR-124-3p	11835	androgen receptor [Mus musculus]
mmu-miR-124-3p	11496	disintegrin and metalloproteinase domain-containing protein 22 isoform 5 precursor [Mus musculus]
mmu-miR-124-3p	11496	disintegrin and metalloproteinase domain-containing protein 22 isoform 4 precursor [Mus musculus]
mmu-miR-124-3p	11496	disintegrin and metalloproteinase domain-containing protein 22 isoform c precursor [Mus musculus]
mmu-miR-124-3p	11489	disintegrin and metalloproteinase domain-containing protein 12 precursor [Mus musculus]
mmu-miR-344d-3p	100503704	Protein syndesmos [Cricetulus griseus]
mmu-miR-344d-3p	100418235	PREDICTED: proteasome subunit alpha type-6 [Saimiri boliviensis boliviensis]
mmu-miR-344d-3p	791364	-
mmu-miR-344d-3p	433386	coiled-coil domain-containing protein 185 [Mus musculus]
mmu-miR-344d-3p	399510	mitogen-activated protein kinase kinase kinase kinase 5, isoform CRA_c, partial [Mus musculus]
mmu-miR-344d-3p	381760	single-stranded DNA binding protein 1, isoform CRA_c, partial [Mus musculus]
mmu-miR-344d-3p	329260	DENN domain-containing protein 1B isoform 1 [Mus musculus]
mmu-miR-344d-3p	320840	neuronal growth regulator 1 isoform a precursor [Mus musculus]
mmu-miR-344d-3p	320267	far upstream element-binding protein 3 isoform b [Mus musculus]
mmu-miR-344d-3p	319832	mCG22856, partial [Mus musculus]
mmu-miR-344d-3p	276865	PREDICTED: olfactory receptor 1371 isoform X1 [Mus musculus]
mmu-miR-344d-3p	271813	cytosolic carboxypeptidase 2 [Mus musculus]
mmu-miR-344d-3p	258258	olfactory receptor 1308 [Mus musculus]
mmu-miR-344d-3p	241070	G-protein coupled receptor 1 [Mus musculus]
mmu-miR-344d-3p	231506	mKIAA2037 protein [Mus musculus]
mmu-miR-344d-3p	229096	Ythdf3 protein [Mus musculus]
mmu-miR-344d-3p	227682	probable tRNA pseudouridine synthase 2 isoform c [Mus musculus]
mmu-miR-344d-3p	226243	hyaluronan-binding protein 2 precursor [Mus musculus]
mmu-miR-344d-3p	225182	mCG14102, isoform CRA_b, partial [Mus musculus]
mmu-miR-344d-3p	224088	probable cation-transporting ATPase 13A3 isoform 1 [Mus musculus]
mmu-miR-344d-3p	218850	protein TASOR isoform 2 [Mus musculus]
mmu-miR-344d-3p	213056	-
mmu-miR-344d-3p	211586	PREDICTED: transcription factor Dp-2 isoform X11 [Mus musculus]
mmu-miR-344d-3p	211472	olfactory receptor 1373 [Mus musculus]
mmu-miR-344d-3p	211305	F-box and WD-40 domain protein 13 [Mus musculus]
mmu-miR-344d-3p	208151	transmembrane protein 132B precursor [Mus musculus]
mmu-miR-344d-3p	207278	-
mmu-miR-344d-3p	170760	acyl-Coenzyme A binding domain containing 3, isoform CRA_a, partial [Mus musculus]
mmu-miR-344d-3p	111241	PREDICTED: high mobility group protein HMG-I/HMG-Y isoform X2 [Cricetulus griseus]
mmu-miR-344d-3p	109828	-
mmu-miR-344d-3p	109731	amine oxidase [flavin-containing] B [Mus musculus]
mmu-miR-344d-3p	109264	NADP-dependent malic enzyme, mitochondrial [Mus musculus]
mmu-miR-344d-3p	105975	-
mmu-miR-344d-3p	100201	transmembrane protein 64 [Mus musculus]
mmu-miR-344d-3p	99031	mKIAA4128 protein [Mus musculus]
mmu-miR-344d-3p	94217	PREDICTED: low-density lipoprotein receptor-related protein 1B isoform X1 [Mus musculus]
mmu-miR-344d-3p	77938	protein FAM53B [Mus musculus]
mmu-miR-344d-3p	77604	RNA-binding protein 12B-B [Mus musculus]
mmu-miR-344d-3p	76366	translation initiation factor IF-3, mitochondrial [Mus musculus]
mmu-miR-344d-3p	75786	cytoskeleton-associated protein 5 isoform 1 [Mus musculus]
mmu-miR-344d-3p	75553	zinc finger CCCH type containing 14, isoform CRA_b, partial [Mus musculus]
mmu-miR-344d-3p	75016	-
mmu-miR-344d-3p	74349	FTS and Hook-interacting protein isoform b [Mus musculus]
mmu-miR-344d-3p	74104	-
mmu-miR-344d-3p	73182	RIKEN cDNA 3110045G13, isoform CRA_b, partial [Mus musculus]
mmu-miR-344d-3p	72145	WD repeat and FYVE domain-containing protein 3 [Mus musculus]
mmu-miR-344d-3p	71458	BCL-6 corepressor isoform a [Mus musculus]
mmu-miR-344d-3p	70144	leucine-rich repeat and calponin homology domain-containing protein 3 isoform 4 [Mus musculus]
mmu-miR-344d-3p	68178	cingulin-like protein 1 [Mus musculus]
mmu-miR-344d-3p	67281	PREDICTED: LOW QUALITY PROTEIN: ribosomal protein L37 [Bubalus bubalis]
mmu-miR-344d-3p	67226	transmembrane protein 19, isoform CRA_c [Mus musculus]
mmu-miR-344d-3p	66662	-
mmu-miR-344d-3p	65254	dihydropyrimidinase-like 5, isoform CRA_c, partial [Mus musculus]
mmu-miR-344d-3p	64898	lipin 2, isoform CRA_d, partial [Mus musculus]
mmu-miR-344d-3p	64385	PREDICTED: leukotriene-B4 omega-hydroxylase 3 isoform X2 [Mus musculus]
mmu-miR-344d-3p	64385	cytochrome P450, family 4, subfamily f, polypeptide 14, isoform CRA_b [Mus musculus]
mmu-miR-344d-3p	59125	-
mmu-miR-344d-3p	59026	E3 ubiquitin-protein ligase HUWE1 [Mus musculus]
mmu-miR-344d-3p	57784	bridging integrator 3 [Mus musculus]
mmu-miR-344d-3p	57314	negative elongation factor D [Mus musculus]
mmu-miR-344d-3p	56176	phosphatidylinositol N-acetylglucosaminyltransferase subunit P isoform c [Mus musculus]
mmu-miR-344d-3p	54396	interferon inducible GTPase 2 [Mus musculus]
mmu-miR-344d-3p	53892	unnamed protein product [Mus musculus]
mmu-miR-344d-3p	29820	tumor necrosis factor receptor superfamily member 19 precursor [Mus musculus]
mmu-miR-344d-3p	26367	-
mmu-miR-344d-3p	22764	PREDICTED: zinc finger X-chromosomal protein isoform X2 [Mus musculus]
mmu-miR-344d-3p	21454	T-complex protein 1 subunit alpha isoform 1 [Mus musculus]
mmu-miR-344d-3p	20910	syntaxin binding protein 1, isoform CRA_b, partial [Mus musculus]
mmu-miR-344d-3p	20867	stress-induced-phosphoprotein 1 [Mus musculus]
mmu-miR-344d-3p	19934	PREDICTED: 60S ribosomal protein L22 [Ornithorhynchus anatinus]
mmu-miR-344d-3p	19823	PREDICTED: RING-box protein 2 [Tupaia chinensis]
mmu-miR-344d-3p	19820	E3 ubiquitin-protein ligase RLIM [Mus musculus]
mmu-miR-344d-3p	19743	ammonium transporter Rh type A precursor [Mus musculus]
mmu-miR-344d-3p	19691	ATP-dependent DNA helicase Q1 isoform 1 [Mus musculus]
mmu-miR-344d-3p	18996	POU domain, class 4, transcription factor 1 [Mus musculus]
mmu-miR-344d-3p	18578	PREDICTED: cAMP-specific 3',5'-cyclic phosphodiesterase 4B isoform X4 [Oryctolagus cuniculus]
mmu-miR-344d-3p	18521	poly(rC)-binding protein 2 [Bos taurus]
mmu-miR-344d-3p	18519	histone acetyltransferase KAT2B isoform 1 [Mus musculus]
mmu-miR-344d-3p	18212	BDNF/NT-3 growth factors receptor isoform a precursor [Mus musculus]
mmu-miR-344d-3p	18074	nidogen-2 precursor [Mus musculus]
mmu-miR-344d-3p	18073	nidogen-1 precursor [Mus musculus]
mmu-miR-344d-3p	17912	unconventional myosin-Ib isoform 2 [Mus musculus]
mmu-miR-344d-3p	16923	rCG21617, isoform CRA_b [Rattus norvegicus]
mmu-miR-344d-3p	16874	PREDICTED: LIM/homeobox protein Lhx6 isoform X1 [Macaca nemestrina]
mmu-miR-344d-3p	15465	-
mmu-miR-344d-3p	15405	homeobox protein Hox-A9 isoform 2 [Mus musculus]
mmu-miR-344d-3p	14924	membrane-associated guanylate kinase, WW and PDZ domain-containing protein 1 isoform f [Mus musculus]
mmu-miR-344d-3p	14621	gap junction beta-4 protein [Mus musculus]
mmu-miR-344d-3p	14594	glycoprotein galactosyltransferase alpha 1, 3, isoform CRA_c, partial [Mus musculus]
mmu-miR-344d-3p	14268	fibronectin isoform d precursor [Mus musculus]
mmu-miR-344d-3p	14026	PREDICTED: ena/VASP-like protein isoform X1 [Mus musculus]
mmu-miR-344d-3p	13866	-
mmu-miR-344d-3p	13511	desmoglein-2 preproprotein [Mus musculus]
mmu-miR-344d-3p	13047	protein CASP isoform a [Mus musculus]
mmu-miR-344d-3p	13047	mKIAA4047 protein [Mus musculus]
mmu-miR-344d-3p	13047	protein CASP isoform c [Mus musculus]
mmu-miR-344d-3p	12648	DNA-binding protein [Mus musculus]
mmu-miR-344d-3p	12380	calpastatin isoform 6 [Mus musculus]
mmu-miR-344d-3p	12313	-
mmu-miR-344d-3p	12237	-
mmu-miR-409-5p	100861531	hypothetical protein T03_16985 [Trichinella britovi]
mmu-miR-409-5p	100689703	mCG1036165, isoform CRA_b, partial [Mus musculus]
mmu-miR-409-5p	100505025	-
mmu-miR-409-5p	100502932	-
mmu-miR-409-5p	100303644	-
mmu-miR-409-5p	100039138	mCG12390, isoform CRA_b, partial [Mus musculus]
mmu-miR-409-5p	622552	-
mmu-miR-409-5p	619327	unnamed protein product [Mus musculus]
mmu-miR-409-5p	546161	F-box and WD-40 domain protein 18 [Mus musculus]
mmu-miR-409-5p	432989	-
mmu-miR-409-5p	382137	RIKEN cDNA D630004A14, isoform CRA_a, partial [Mus musculus]
mmu-miR-409-5p	382106	F-box and WD-40 domain protein 24 [Mus musculus]
mmu-miR-409-5p	347722	mKIAA1099 protein [Mus musculus]
mmu-miR-409-5p	347722	arf-GAP with GTPase, ANK repeat and PH domain-containing protein 1 isoform 2 [Mus musculus]
mmu-miR-409-5p	338535	-
mmu-miR-409-5p	338403	beta-Ala-His dipeptidase [Mus musculus]
mmu-miR-409-5p	332396	Kcnk18 protein, partial [Mus musculus]
mmu-miR-409-5p	329753	-
mmu-miR-409-5p	329554	PREDICTED: uncharacterized protein LOC329554 isoform X1 [Mus musculus]
mmu-miR-409-5p	328579	mCG1027739 [Mus musculus]
mmu-miR-409-5p	328287	-
mmu-miR-409-5p	328136	-
mmu-miR-409-5p	320749	Epidermal growth factor receptor kinase substrate 8-like protein 1 [Heterocephalus glaber]
mmu-miR-409-5p	320683	PREDICTED: zinc finger protein 629 isoform X2 [Mus musculus]
mmu-miR-409-5p	320297	-
mmu-miR-409-5p	319601	zinc finger protein 653 isoform 2 [Mus musculus]
mmu-miR-409-5p	270096	vacuolar fusion protein MON1 homolog B [Mus musculus]
mmu-miR-409-5p	269952	GDP-D-glucose phosphorylase 1 [Mus musculus]
mmu-miR-409-5p	269587	-
mmu-miR-409-5p	258822	olfactory receptor 39 [Mus musculus]
mmu-miR-409-5p	243328	equilibrative nucleoside transporter 4 [Mus musculus]
mmu-miR-409-5p	240066	zinc finger protein 870 [Mus musculus]
mmu-miR-409-5p	239591	protein monoglycylase TTLL8 [Mus musculus]
mmu-miR-409-5p	238871	cAMP-specific 3',5'-cyclic phosphodiesterase 4D [Mus musculus]
mmu-miR-409-5p	237716	probable G-protein coupled receptor 75 [Mus musculus]
mmu-miR-409-5p	236900	pyruvate dehydrogenase kinase, isoenzyme 3, isoform CRA_a, partial [Mus musculus]
mmu-miR-409-5p	230801	GPI mannosyltransferase 2 isoform 2 [Mus musculus]
mmu-miR-409-5p	230753	thyroid hormone receptor-associated protein 3 [Xenopus laevis]
mmu-miR-409-5p	224697	-
mmu-miR-409-5p	224139	golgin subfamily B member 1 [Mus musculus]
mmu-miR-409-5p	215474	vesicle-trafficking protein SEC22c [Mus musculus]
mmu-miR-409-5p	214791	SERTA domain containing 4, isoform CRA_a, partial [Mus musculus]
mmu-miR-409-5p	213556	pleckstrin homology domain-containing family H member 2 [Mus musculus]
mmu-miR-409-5p	209039	-
mmu-miR-409-5p	192654	group XV phospholipase A2 precursor [Mus musculus]
mmu-miR-409-5p	114615	-
mmu-miR-409-5p	109079	selenophosphate synthetase 1, isoform CRA_b, partial [Mus musculus]
mmu-miR-409-5p	108802	calreticulin 4 isoform b precursor [Mus musculus]
mmu-miR-409-5p	108737	mCG20975, isoform CRA_c, partial [Mus musculus]
mmu-miR-409-5p	108077	mCG15924, isoform CRA_i, partial [Mus musculus]
mmu-miR-409-5p	94066	39S ribosomal protein L36, mitochondrial [Mus musculus]
mmu-miR-409-5p	93686	RNA binding protein fox-1 homolog 2 isoform 2 [Mus musculus]
mmu-miR-409-5p	93686	PREDICTED: RNA binding protein fox-1 homolog 2 isoform X6 [Mus musculus]
mmu-miR-409-5p	93686	PREDICTED: RNA binding protein fox-1 homolog 2 isoform X4 [Rattus norvegicus]
mmu-miR-409-5p	80749	leucine-rich repeat and fibronectin type III domain-containing protein 1 isoform 2 precursor [Mus musculus]
mmu-miR-409-5p	80749	leucine-rich repeat and fibronectin type III domain-containing protein 1 isoform 1 precursor [Mus musculus]
mmu-miR-409-5p	76998	-
mmu-miR-409-5p	75717	cullin-5 isoform 1 [Mus musculus]
mmu-miR-409-5p	75304	unnamed protein product [Mus musculus]
mmu-miR-409-5p	73270	-
mmu-miR-409-5p	72345	-
mmu-miR-409-5p	72003	synaptoporin isoform 1 [Mus musculus]
mmu-miR-409-5p	71877	-
mmu-miR-409-5p	71355	-
mmu-miR-409-5p	71355	-
mmu-miR-409-5p	71228	disks large homolog 5 isoform 2 [Mus musculus]
mmu-miR-409-5p	71228	disks large homolog 5 isoform 1 [Mus musculus]
mmu-miR-409-5p	70796	zinc finger, DHHC domain containing 1, isoform CRA_a, partial [Mus musculus]
mmu-miR-409-5p	70784	ras-like protein family member 12 isoform 1 [Mus musculus]
mmu-miR-409-5p	70495	renin receptor precursor [Mus musculus]
mmu-miR-409-5p	69350	mCG146195, partial [Mus musculus]
mmu-miR-409-5p	68420	-
mmu-miR-409-5p	67889	PREDICTED: probable RNA-binding protein 18 isoform X1 [Otolemur garnettii]
mmu-miR-409-5p	67298	mKIAA0443 protein [Mus musculus]
mmu-miR-409-5p	67010	-
mmu-miR-409-5p	66503	-
mmu-miR-409-5p	66058	transmembrane protein 176A [Mus musculus]
mmu-miR-409-5p	56205	PREDICTED: alpha-endosulfine isoform X1 [Microtus ochrogaster]
mmu-miR-409-5p	56046	RIKEN cDNA 2410003P15, isoform CRA_d, partial [Mus musculus]
mmu-miR-409-5p	54519	-
mmu-miR-409-5p	54369	nucleoside diphosphate kinase 6 [Mus musculus]
mmu-miR-409-5p	53881	sodium/myo-inositol cotransporter [Mus musculus]
mmu-miR-409-5p	53627	-
mmu-miR-409-5p	53625	N-acetyllactosaminide beta-1,3-N-acetylglucosaminyltransferase 2 [Mus musculus]
mmu-miR-409-5p	53413	exocyst complex component 7 isoform 1 [Mus musculus]
mmu-miR-409-5p	27045	nitrilase homolog 1 isoform 1 [Mus musculus]
mmu-miR-409-5p	26390	mitogen-activated protein kinase-binding protein 1 [Mus musculus]
mmu-miR-409-5p	23965	teneurin-3 isoform 1 [Mus musculus]
mmu-miR-409-5p	23965	teneurin-3 isoform 2 [Mus musculus]
mmu-miR-409-5p	20266	sodium channel, voltage-gated, type I, beta, isoform CRA_a, partial [Mus musculus]
mmu-miR-409-5p	18181	PREDICTED: nuclear respiratory factor 1 isoform X3 [Chinchilla lanigera]
mmu-miR-409-5p	18164	neuronal pentraxin-1 precursor [Mus musculus]
mmu-miR-409-5p	17913	unconventional myosin-Ic isoform a [Mus musculus]
mmu-miR-409-5p	17304	lactadherin isoform 1 precursor [Mus musculus]
mmu-miR-409-5p	17304	lactadherin isoform 2 precursor [Mus musculus]
mmu-miR-409-5p	16147	-
mmu-miR-409-5p	14311	cell death-inducing DFFA-like effector c, isoform CRA_d, partial [Mus musculus]
mmu-miR-409-5p	14254	vascular endothelial growth factor receptor 1 precursor [Mus musculus]
mmu-miR-409-5p	12572	cyclin-dependent kinase 7 [Mus musculus]
mmu-miR-409-5p	11537	complement factor D isoform 2 precursor [Mus musculus]
mmu-miR-129-2-3p	102465777	-
mmu-miR-129-2-3p	100504399	-
mmu-miR-129-2-3p	654424	unnamed protein product [Mus musculus]
mmu-miR-129-2-3p	544817	rho GTPase-activating protein 27 isoform 2 [Mus musculus]
mmu-miR-129-2-3p	414067	-
mmu-miR-129-2-3p	407809	-
mmu-miR-129-2-3p	381356	calcium channel flower homolog isoform 2 [Mus musculus]
mmu-miR-129-2-3p	381353	uncharacterized protein C9orf172 homolog [Mus musculus]
mmu-miR-129-2-3p	331623	-
mmu-miR-129-2-3p	329828	mKIAA1161 protein [Mus musculus]
mmu-miR-129-2-3p	329562	RIKEN cDNA A530013C23, isoform CRA_a [Mus musculus]
mmu-miR-129-2-3p	329559	-
mmu-miR-129-2-3p	320204	RIKEN cDNA 4833442J19, isoform CRA_a, partial [Mus musculus]
mmu-miR-129-2-3p	319508	synaptotagmin-15 isoform a [Mus musculus]
mmu-miR-129-2-3p	319493	uncharacterized protein LOC319493 [Mus musculus]
mmu-miR-129-2-3p	319466	-
mmu-miR-129-2-3p	268379	-
mmu-miR-129-2-3p	243833	zinc finger protein 8 [Mus musculus]
mmu-miR-129-2-3p	241035	fibrocystin precursor [Mus musculus]
mmu-miR-129-2-3p	240665	cyclin-J [Mus musculus]
mmu-miR-129-2-3p	235493	protein FAM214A isoform 2 [Mus musculus]
mmu-miR-129-2-3p	231866	zinc finger protein 12 isoform 2 [Mus musculus]
mmu-miR-129-2-3p	228677	RIKEN cDNA C130053K05, isoform CRA_a, partial [Mus musculus]
mmu-miR-129-2-3p	225280	INO80 complex subunit C [Mus musculus]
mmu-miR-129-2-3p	224833	uncharacterized protein C6orf132 homolog [Mus musculus]
mmu-miR-129-2-3p	223917	cDNA sequence BC031593, partial [Mus musculus]
mmu-miR-129-2-3p	219189	von Willebrand factor A domain-containing protein 8 isoform 1 precursor [Mus musculus]
mmu-miR-129-2-3p	219189	-
mmu-miR-129-2-3p	216505	RIKEN cDNA 1500004A08, isoform CRA_c, partial [Mus musculus]
mmu-miR-129-2-3p	215051	-
mmu-miR-129-2-3p	211484	PREDICTED: testis-specific gene 10 protein isoform X4 [Mus musculus]
mmu-miR-129-2-3p	107173	PREDICTED: integral membrane protein GPR137 isoform X2 [Odobenus rosmarus divergens]
mmu-miR-129-2-3p	101100	tubulin monoglycylase TTLL3 isoform 1 [Mus musculus]
mmu-miR-129-2-3p	93837	dachshund homolog 2 isoform 1 [Mus musculus]
mmu-miR-129-2-3p	83921	-
mmu-miR-129-2-3p	77090	RIKEN cDNA 9430098E02, isoform CRA_a, partial [Mus musculus]
mmu-miR-129-2-3p	76681	Trim12 protein [Mus musculus]
mmu-miR-129-2-3p	76183	bruno-like 6, RNA binding protein (Drosophila), isoform CRA_a, partial [Mus musculus]
mmu-miR-129-2-3p	75957	mCG1042649, partial [Mus musculus]
mmu-miR-129-2-3p	75409	PREDICTED: SLIT and NTRK-like protein 5 isoform X2 [Mus musculus]
mmu-miR-129-2-3p	74309	-
mmu-miR-129-2-3p	74309	oxysterol-binding protein 2 isoform 2 [Mus musculus]
mmu-miR-129-2-3p	74309	oxysterol-binding protein 2 isoform 1 [Mus musculus]
mmu-miR-129-2-3p	74252	armadillo repeat-containing protein 1 [Mus musculus]
mmu-miR-129-2-3p	73968	-
mmu-miR-129-2-3p	73473	IWS1 homolog (S. cerevisiae), isoform CRA_b, partial [Mus musculus]
mmu-miR-129-2-3p	72844	PREDICTED: BTB/POZ domain-containing protein KCTD17 isoform X6 [Nannospalax galili]
mmu-miR-129-2-3p	72230	zinc finger protein 558 [Mus musculus]
mmu-miR-129-2-3p	71264	-
mmu-miR-129-2-3p	69439	PREDICTED: uncharacterized protein LOC69439 isoform X3 [Mus musculus]
mmu-miR-129-2-3p	68385	calfacilitin isoform c [Mus musculus]
mmu-miR-129-2-3p	68327	RIKEN cDNA 0610007P22, isoform CRA_a, partial [Mus musculus]
mmu-miR-129-2-3p	68327	RIKEN cDNA 0610007P22, isoform CRA_a, partial [Mus musculus]
mmu-miR-129-2-3p	67821	protein ATP1B4 isoform 1 [Mus musculus]
mmu-miR-129-2-3p	67821	protein ATP1B4 isoform 2 [Mus musculus]
mmu-miR-129-2-3p	67416	mKIAA0512 protein [Mus musculus]
mmu-miR-129-2-3p	66961	-
mmu-miR-129-2-3p	66168	-
mmu-miR-129-2-3p	66139	protein myomaker isoform 2 [Mus musculus]
mmu-miR-129-2-3p	64339	fibronectin type III domain-containing protein 4 precursor [Mus musculus]
mmu-miR-129-2-3p	57745	zinc finger protein 112 [Mus musculus]
mmu-miR-129-2-3p	57246	T-box transcription factor TBX20 isoform a [Mus musculus]
mmu-miR-129-2-3p	56707	-
mmu-miR-129-2-3p	56707	-
mmu-miR-129-2-3p	56637	PREDICTED: glycogen synthase kinase-3 beta isoform X2 [Tupaia chinensis]
mmu-miR-129-2-3p	56525	PREDICTED: zinc finger protein 235 isoform X3 [Mus musculus]
mmu-miR-129-2-3p	54678	zinc finger protein 108 [Mus musculus]
mmu-miR-129-2-3p	53609	PREDICTED: CLK4-associating serine/arginine rich protein isoform X4 [Mus musculus]
mmu-miR-129-2-3p	52331	starch-binding domain-containing protein 1 [Mus musculus]
mmu-miR-129-2-3p	51799	RUN domain-containing protein 3A isoform 1 [Mus musculus]
mmu-miR-129-2-3p	51799	Rap2 interacting protein, isoform CRA_b, partial [Mus musculus]
mmu-miR-129-2-3p	24067	PREDICTED: signal recognition particle 54 kDa protein isoform X1 [Felis catus]
mmu-miR-129-2-3p	22755	zinc finger protein 235 [Mus musculus]
mmu-miR-129-2-3p	22691	zinc finger and SCAN domain-containing protein 2 [Mus musculus]
mmu-miR-129-2-3p	21769	AN1-type zinc finger protein 3 [Mus musculus]
mmu-miR-129-2-3p	20399	PREDICTED: SH2B adapter protein 1 isoform X2 [Rattus norvegicus]
mmu-miR-129-2-3p	19293	parvalbumin, isoform CRA_b [Mus musculus]
mmu-miR-129-2-3p	18824	-
mmu-miR-129-2-3p	18781	group IIC secretory phospholipase A2 precursor [Mus musculus]
mmu-miR-129-2-3p	18472	platelet-activating factor acetylhydrolase IB subunit alpha [Mus musculus]
mmu-miR-129-2-3p	18007	neogenin, isoform CRA_b, partial [Mus musculus]
mmu-miR-129-2-3p	18007	neogenin, isoform CRA_a, partial [Mus musculus]
mmu-miR-129-2-3p	17306	synaptophysin-like protein 2 [Mus musculus]
mmu-miR-129-2-3p	17263	-
mmu-miR-129-2-3p	16885	-
mmu-miR-129-2-3p	16516	ATP-sensitive inward rectifier potassium channel 15 isoform a [Mus musculus]
mmu-miR-129-2-3p	16337	insulin receptor precursor [Mus musculus]
mmu-miR-129-2-3p	14708	guanine nucleotide-binding protein G(I)/G(S)/G(O) subunit gamma-7 [Mus musculus]
mmu-miR-129-2-3p	14708	guanine nucleotide-binding protein G(I)/G(S)/G(O) subunit gamma-7 [Mus musculus]
mmu-miR-129-2-3p	14674	guanine nucleotide binding protein, alpha 13, isoform CRA_a, partial [Mus musculus]
mmu-miR-129-2-3p	14235	Forkhead box M1 [Mus musculus]
mmu-miR-129-2-3p	13560	E4F transcription factor 1, isoform CRA_a, partial [Mus musculus]
mmu-miR-129-2-3p	13496	AT rich interactive domain 3A (Bright like), isoform CRA_b, partial [Mus musculus]
mmu-miR-129-2-3p	13496	AT rich interactive domain 3A (Bright like), isoform CRA_b, partial [Mus musculus]
mmu-miR-129-2-3p	13496	AT rich interactive domain 3A (Bright like), isoform CRA_b, partial [Mus musculus]
mmu-miR-129-2-3p	12828	collagen alpha-3(IV) chain precursor [Mus musculus]
mmu-miR-129-2-3p	12821	collagen alpha-1(XVII) chain isoform 2 [Mus musculus]
mmu-miR-129-2-3p	12569	cyclin-dependent kinase 5 activator 1 [Mus musculus]
mmu-miR-129-2-3p	12476	CD151 antigen [Mus musculus]
mmu-miR-129-2-3p	12288	voltage-dependent L-type calcium channel subunit alpha-1C isoform 8 [Mus musculus]
mmu-miR-496a-3p	100417125	mCG144699, partial [Mus musculus]
mmu-miR-496a-3p	545428	coiled-coil domain-containing protein 141 [Mus musculus]
mmu-miR-496a-3p	544963	mCG114897, isoform CRA_a, partial [Mus musculus]
mmu-miR-496a-3p	442834	-
mmu-miR-496a-3p	381695	NEDD4-binding protein 2-like 2 [Mus musculus]
mmu-miR-496a-3p	381290	-
mmu-miR-496a-3p	353282	scm-like with four MBT domains protein 2 isoform 1 [Mus musculus]
mmu-miR-496a-3p	328576	mCG1050940 [Mus musculus]
mmu-miR-496a-3p	320661	uncharacterized protein KIAA0232 [Mus musculus]
mmu-miR-496a-3p	320454	transmembrane protease serine 11G [Mus musculus]
mmu-miR-496a-3p	320225	PREDICTED: cation channel sperm-associated protein subunit gamma 1 isoform X5 [Mus musculus]
mmu-miR-496a-3p	272322	aryl hydrocarbon receptor nuclear translocator-like protein 2 isoform 1 [Mus musculus]
mmu-miR-496a-3p	270669	membrane-bound transcription factor site-2 protease [Mus musculus]
mmu-miR-496a-3p	258384	olfactory receptor 1350 [Mus musculus]
mmu-miR-496a-3p	243219	-
mmu-miR-496a-3p	239170	protein FAM160B2 [Mus musculus]
mmu-miR-496a-3p	234593	protein NDRG4 isoform B [Mus musculus]
mmu-miR-496a-3p	233789	serine/threonine-protein kinase SMG1 [Mus musculus]
mmu-miR-496a-3p	230815	mannosyl-oligosaccharide 1,2-alpha-mannosidase IC [Mus musculus]
mmu-miR-496a-3p	230603	RIKEN cDNA 4922503N01, isoform CRA_d, partial [Mus musculus]
mmu-miR-496a-3p	228998	ADP-ribosylation factor GTPase activating protein 1, isoform CRA_f, partial [Mus musculus]
mmu-miR-496a-3p	228778	uncharacterized protein C20orf96 homolog isoform 2 [Mus musculus]
mmu-miR-496a-3p	223732	protein LDOC1L [Mus musculus]
mmu-miR-496a-3p	217265	ATP-binding cassette sub-family A member 5 [Mus musculus]
mmu-miR-496a-3p	217026	HEAT repeat-containing protein 6 [Mus musculus]
mmu-miR-496a-3p	216965	serine/threonine-protein kinase TAO1 [Mus musculus]
mmu-miR-496a-3p	216725	A disintegrin and metalloproteinase with thrombospondin motifs 2 preproprotein [Mus musculus]
mmu-miR-496a-3p	212980	solute carrier family 45 member 3 [Mus musculus]
mmu-miR-496a-3p	212943	protein FAM46A isoform 1 [Mus musculus]
mmu-miR-496a-3p	207920	epithelial splicing regulatory protein 1 isoform 2 [Mus musculus]
mmu-miR-496a-3p	170748	cDNA sequence BC017612, isoform CRA_a [Mus musculus]
mmu-miR-496a-3p	109079	selenophosphate synthetase 1, isoform CRA_b, partial [Mus musculus]
mmu-miR-496a-3p	107182	-
mmu-miR-496a-3p	105120	-
mmu-miR-496a-3p	100855	TBC1 domain family member 14 isoform c [Mus musculus]
mmu-miR-496a-3p	98558	-
mmu-miR-496a-3p	93842	immunoglobulin superfamily, member 9, isoform CRA_a, partial [Mus musculus]
mmu-miR-496a-3p	81010	vomeronasal 1 receptor 172 [Mus musculus]
mmu-miR-496a-3p	78919	fibronectin type III domain-containing protein 8 [Mus musculus]
mmu-miR-496a-3p	78376	suppressor APC domain-containing protein 1 [Mus musculus]
mmu-miR-496a-3p	77633	PREDICTED: eukaryotic peptide chain release factor GTP-binding subunit ERF3A [Orcinus orca]
mmu-miR-496a-3p	76630	AMSH-like protease [Mus musculus]
mmu-miR-496a-3p	75956	PREDICTED: serine/arginine repetitive matrix protein 2 isoform X4 [Mus musculus]
mmu-miR-496a-3p	74464	mKIAA1511 protein [Mus musculus]
mmu-miR-496a-3p	74326	-
mmu-miR-496a-3p	74051	metalloreductase STEAP2 [Cricetulus griseus]
mmu-miR-496a-3p	73738	HAUS augmin-like complex subunit 7 isoform 1 [Mus musculus]
mmu-miR-496a-3p	72431	carcinoembryonic antigen-related cell adhesion molecule 18 precursor [Mus musculus]
mmu-miR-496a-3p	72068	CCR4-NOT transcription complex, subunit 2, isoform CRA_f [Mus musculus]
mmu-miR-496a-3p	72029	-
mmu-miR-496a-3p	71768	von Willebrand factor C and EGF domain-containing protein precursor [Mus musculus]
mmu-miR-496a-3p	71722	-
mmu-miR-496a-3p	70349	Chain G, The Structure Of The Copi Coat Triad
mmu-miR-496a-3p	69922	serine/threonine-protein kinase VRK2 isoform 1 [Mus musculus]
mmu-miR-496a-3p	69640	protein FAM83G [Mus musculus]
mmu-miR-496a-3p	69551	unnamed protein product [Mus musculus]
mmu-miR-496a-3p	67846	transmembrane protein 39A isoform 1 [Mus musculus]
mmu-miR-496a-3p	67824	nmrA-like family domain-containing protein 1 isoform 1 [Mus musculus]
mmu-miR-496a-3p	67722	uncharacterized protein LOC67722 [Mus musculus]
mmu-miR-496a-3p	67225	-
mmu-miR-496a-3p	67074	MON2 homolog (yeast), isoform CRA_d, partial [Mus musculus]
mmu-miR-496a-3p	67019	actin-related protein 6 [Mus musculus]
mmu-miR-496a-3p	66961	-
mmu-miR-496a-3p	66279	transmembrane protein 218 isoform 1 [Mus musculus]
mmu-miR-496a-3p	66241	transmembrane protein 9 precursor [Mus musculus]
mmu-miR-496a-3p	58800	transient receptor potential cation channel subfamily M member 7 isoform 1 [Mus musculus]
mmu-miR-496a-3p	56631	E3 ubiquitin-protein ligase TRIM17 [Mus musculus]
mmu-miR-496a-3p	56229	thrombospondin type-1 domain-containing protein 1 isoform 1 precursor [Mus musculus]
mmu-miR-496a-3p	54131	interferon regulatory factor 3 [Mus musculus]
mmu-miR-496a-3p	53413	mKIAA1067 protein [Mus musculus]
mmu-miR-496a-3p	52705	unnamed protein product [Mus musculus]
mmu-miR-496a-3p	52036	serine/threonine-protein phosphatase 6 regulatory subunit 3 isoform 2 [Mus musculus]
mmu-miR-496a-3p	30957	mKIAA1066 protein [Mus musculus]
mmu-miR-496a-3p	27387	SH2 domain containing 3C, isoform CRA_a, partial [Mus musculus]
mmu-miR-496a-3p	26414	-
mmu-miR-496a-3p	26414	-
mmu-miR-496a-3p	23965	teneurin-3 isoform 1 [Mus musculus]
mmu-miR-496a-3p	22213	unnamed protein product [Mus musculus]
mmu-miR-496a-3p	22138	-
mmu-miR-496a-3p	22138	-
mmu-miR-496a-3p	20321	ferric-chelate reductase 1 precursor [Mus musculus]
mmu-miR-496a-3p	18080	ninein, isoform CRA_a, partial [Mus musculus]
mmu-miR-496a-3p	17760	microtubule-associated protein 6 isoform 2 [Mus musculus]
mmu-miR-496a-3p	17749	mCG49314 [Mus musculus]
mmu-miR-496a-3p	17263	-
mmu-miR-496a-3p	16402	-
mmu-miR-496a-3p	16396	mKIAA4011 protein [Mus musculus]
mmu-miR-496a-3p	14202	four and a half LIM domains 4 [Mus musculus]
mmu-miR-496a-3p	14017	protein EVI2A precursor [Mus musculus]
mmu-miR-496a-3p	13872	TFIIH basal transcription factor complex helicase XPB subunit [Mus musculus]
mmu-miR-496a-3p	13860	epidermal growth factor receptor kinase substrate 8 isoform 2 [Mus musculus]
mmu-miR-496a-3p	13684	-
mmu-miR-496a-3p	13507	-
mmu-miR-496a-3p	13492	-
mmu-miR-496a-3p	13433	DNA methyltransferase (cytosine-5) 1, isoform CRA_e, partial [Mus musculus]
mmu-miR-496a-3p	13426	cytoplasmic dynein 1 intermediate chain 1 isoform 4 [Mus musculus]
mmu-miR-496a-3p	12805	contactin-1 precursor [Mus musculus]
mmu-miR-496a-3p	12505	CD44 antigen isoform b precursor [Mus musculus]
mmu-miR-496a-3p	12325	calcium/calmodulin-dependent protein kinase type II subunit gamma isoform 3 [Homo sapiens]
mmu-miR-496a-3p	11496	disintegrin and metalloproteinase domain-containing protein 22 isoform c precursor [Mus musculus]
mmu-miR-147-3p	100415785	keratin associated protein 9-1 [Mus musculus]
mmu-miR-147-3p	670533	keratin associated protein 9-1 [Mus musculus]
mmu-miR-147-3p	432600	keratin associated protein 9-1 [Mus musculus]
mmu-miR-147-3p	381284	ciliary rootlet coiled-coil, rootletin family member 2 [Mus musculus]
mmu-miR-147-3p	330485	transmembrane protein 145, isoform CRA_b, partial [Mus musculus]
mmu-miR-147-3p	329559	-
mmu-miR-147-3p	329093	carboxypeptidase A6 isoform 1 preproprotein [Mus musculus]
mmu-miR-147-3p	329093	PREDICTED: carboxypeptidase A6 [Mesocricetus auratus]
mmu-miR-147-3p	321008	uncharacterized protein C19orf68 homolog [Mus musculus]
mmu-miR-147-3p	244757	-
mmu-miR-147-3p	244757	beta-galactosidase-1-like protein 2 isoform 2 precursor [Mus musculus]
mmu-miR-147-3p	243083	transmembrane protease serine 11F [Mus musculus]
mmu-miR-147-3p	242700	-
mmu-miR-147-3p	242259	choline transporter-like protein 5 [Mus musculus]
mmu-miR-147-3p	234776	PREDICTED: ATM interactor isoform X1 [Mus musculus]
mmu-miR-147-3p	234373	splicing factor, arginine/serine-rich 14, isoform CRA_b, partial [Mus musculus]
mmu-miR-147-3p	234373	splicing factor, arginine/serine-rich 14, isoform CRA_b, partial [Mus musculus]
mmu-miR-147-3p	232539	mCG7099, partial [Mus musculus]
mmu-miR-147-3p	232237	-
mmu-miR-147-3p	231991	PREDICTED: cyclic AMP-responsive element-binding protein 5 isoform X4 [Nannospalax galili]
mmu-miR-147-3p	231991	-
mmu-miR-147-3p	230872	rootletin isoform 1 [Mus musculus]
mmu-miR-147-3p	230872	PREDICTED: rootletin isoform X2 [Mus musculus]
mmu-miR-147-3p	226922	potassium voltage-gated channel subfamily KQT member 5 isoform 3 [Mus musculus]
mmu-miR-147-3p	225288	FH1/FH2 domain-containing protein 3 isoform 1 [Mus musculus]
mmu-miR-147-3p	225288	FH1/FH2 domain-containing protein 3 isoform 3 [Mus musculus]
mmu-miR-147-3p	225288	FH1/FH2 domain-containing protein 3 isoform 2 [Mus musculus]
mmu-miR-147-3p	223690	unnamed protein product [Mus musculus]
mmu-miR-147-3p	217882	mKIAA0284 protein [Mus musculus]
mmu-miR-147-3p	216456	mKIAA4146 protein [Mus musculus]
mmu-miR-147-3p	214804	PREDICTED: rho GTPase-activating protein SYDE2 isoform X1 [Mus musculus]
mmu-miR-147-3p	194268	uncharacterized protein C1orf109 homolog [Mus musculus]
mmu-miR-147-3p	109323	PREDICTED: complement C1q tumor necrosis factor-related protein 7 isoform X3 [Rattus norvegicus]
mmu-miR-147-3p	108071	metabotropic glutamate receptor 5 isoform b precursor [Mus musculus]
mmu-miR-147-3p	108071	metabotropic glutamate receptor 5 isoform a precursor [Mus musculus]
mmu-miR-147-3p	107239	mCG3875, partial [Mus musculus]
mmu-miR-147-3p	76419	-
mmu-miR-147-3p	76419	-
mmu-miR-147-3p	75219	dual specificity phosphatase 18, partial [Mus musculus]
mmu-miR-147-3p	74470	centrosomal protein of 72 kDa [Mus musculus]
mmu-miR-147-3p	72831	HELG [Mus musculus musculus]
mmu-miR-147-3p	72061	-
mmu-miR-147-3p	72061	-
mmu-miR-147-3p	71973	RNA-binding protein with multiple splicing 2 [Mus musculus]
mmu-miR-147-3p	71254	nuclear apoptosis-inducing factor 1 [Mus musculus]
mmu-miR-147-3p	70375	-
mmu-miR-147-3p	70218	kinesin-like protein KIF18B [Mus musculus]
mmu-miR-147-3p	69694	TatD DNase domain containing 1, isoform CRA_b, partial [Mus musculus]
mmu-miR-147-3p	68203	GTP-binding protein Di-Ras2 [Mus musculus]
mmu-miR-147-3p	66606	leucine rich repeat containing 57, isoform CRA_d, partial [Mus musculus]
mmu-miR-147-3p	66606	leucine rich repeat containing 57, isoform CRA_d, partial [Mus musculus]
mmu-miR-147-3p	66606	leucine rich repeat containing 57, isoform CRA_d, partial [Mus musculus]
mmu-miR-147-3p	56353	PREDICTED: RING1 and YY1-binding protein [Oryctolagus cuniculus]
mmu-miR-147-3p	27403	ATP-binding cassette sub-family A member 7 [Mus musculus]
mmu-miR-147-3p	27388	phosphatidylserine synthase 2 [Mus musculus]
mmu-miR-147-3p	27225	DEAD (Asp-Glu-Ala-Asp) box polypeptide 24, isoform CRA_a, partial [Mus musculus]
mmu-miR-147-3p	27225	DEAD (Asp-Glu-Ala-Asp) box polypeptide 24, isoform CRA_a, partial [Mus musculus]
mmu-miR-147-3p	22116	serine/threonine kinase 22 substrate 1, partial [Mus musculus]
mmu-miR-147-3p	22116	PREDICTED: testis-specific serine kinase substrate isoform X2 [Mus musculus]
mmu-miR-147-3p	21948	-
mmu-miR-147-3p	20602	nuclear receptor co-repressor 2, isoform CRA_c, partial [Mus musculus]
mmu-miR-147-3p	20602	PREDICTED: nuclear receptor corepressor 2 isoform X7 [Mus musculus]
mmu-miR-147-3p	20418	src homology 2 domain-containing transforming protein C3 [Mus musculus]
mmu-miR-147-3p	18846	plexin-A3 precursor [Mus musculus]
mmu-miR-147-3p	18810	plectin 1, isoform CRA_b [Mus musculus]
mmu-miR-147-3p	18810	plectin 1, isoform CRA_b [Mus musculus]
mmu-miR-147-3p	18810	plectin 1, isoform CRA_b [Mus musculus]
mmu-miR-147-3p	18810	plectin 1, isoform CRA_b [Mus musculus]
mmu-miR-147-3p	18810	plectin 1, isoform CRA_b [Mus musculus]
mmu-miR-147-3p	18810	plectin 1, isoform CRA_b [Mus musculus]
mmu-miR-147-3p	18810	plectin 1, isoform CRA_b [Mus musculus]
mmu-miR-147-3p	18810	plectin 1, isoform CRA_b [Mus musculus]
mmu-miR-147-3p	18810	plectin 1, isoform CRA_b [Mus musculus]
mmu-miR-147-3p	18810	plectin 1, isoform CRA_b [Mus musculus]
mmu-miR-147-3p	18810	plectin 1, isoform CRA_b [Mus musculus]
mmu-miR-147-3p	18810	plectin 1, isoform CRA_b [Mus musculus]
mmu-miR-147-3p	18810	plectin 1, isoform CRA_b [Mus musculus]
mmu-miR-147-3p	18810	plectin 1, isoform CRA_b [Mus musculus]
mmu-miR-147-3p	18810	plectin 1, isoform CRA_b [Mus musculus]
mmu-miR-147-3p	18755	-
mmu-miR-147-3p	18755	-
mmu-miR-147-3p	18015	neurofibromin [Mus musculus]
mmu-miR-147-3p	17992	cytochrome c oxidase subunit NDUFA4 [Mus musculus]
mmu-miR-147-3p	17133	transcription factor MafF isoform 3 [Mus musculus]
mmu-miR-147-3p	17133	PREDICTED: transcription factor MafF isoform X1 [Rattus norvegicus]
mmu-miR-147-3p	17133	transcription factor MafF isoform 3 [Mus musculus]
mmu-miR-147-3p	16792	unnamed protein product [Mus musculus]
mmu-miR-147-3p	16705	keratin associated protein 9-1 [Mus musculus]
mmu-miR-147-3p	16403	integrin alpha-6 isoform 1 precursor [Mus musculus]
mmu-miR-147-3p	16403	Itga6 protein, partial [Mus musculus]
mmu-miR-147-3p	14804	glutamate receptor ionotropic, delta-2 precursor [Mus musculus]
mmu-miR-147-3p	14598	gamma-glutamyltranspeptidase 1 precursor [Mus musculus]
mmu-miR-147-3p	14402	-
mmu-miR-147-3p	14402	gamma-aminobutyric acid receptor subunit beta-3 isoform b precursor [Mus musculus]
mmu-miR-147-3p	14241	forkhead box protein L1 [Mus musculus]
mmu-miR-147-3p	14176	fibroblast growth factor 5 isoform 1 precursor [Mus musculus]
mmu-miR-147-3p	14176	fibroblast growth factor 5 isoform 1 precursor [Mus musculus]
mmu-miR-147-3p	13081	-
mmu-miR-147-3p	12580	cyclin-dependent kinase inhibitor 2C (p18, inhibits CDK4), isoform CRA_b, partial [Mus musculus]
mmu-miR-147-3p	11859	-
mmu-miR-147-3p	11694	homeobox protein aristaless-like 3 [Mus musculus]
mmu-miR-5128	100310872	PREDICTED: dynein light chain Tctex-type 1 [Oryctolagus cuniculus]
mmu-miR-5128	100043813	PREDICTED: 40S ribosomal protein S27-like [Otolemur garnettii]
mmu-miR-5128	666927	uncharacterized protein LOC666927 precursor [Mus musculus]
mmu-miR-5128	634104	unnamed protein product [Mus musculus]
mmu-miR-5128	628308	KRAB box and zinc finger C2H2 type domain containing protein-like [Mus musculus]
mmu-miR-5128	625605	vomeronasal 2, receptor 49 precursor [Mus musculus]
mmu-miR-5128	624224	clarin-2 [Mus musculus]
mmu-miR-5128	545817	cytochrome P450 2W1 precursor [Mus musculus]
mmu-miR-5128	434197	protein FAM169B [Mus musculus]
mmu-miR-5128	434117	vomeronasal receptor Vmn2r50 precursor [Mus musculus]
mmu-miR-5128	434110	vomeronasal 2, receptor 38 precursor [Mus musculus]
mmu-miR-5128	404545	anoctamin-7 isoform 1 [Mus musculus]
mmu-miR-5128	382053	carboxylesterase 3A isoform 2 precursor [Mus musculus]
mmu-miR-5128	353310	zinc finger protein 703 isoform 1 [Mus musculus]
mmu-miR-5128	332934	zinc finger MYND domain-containing protein 12 [Mus musculus]
mmu-miR-5128	330660	-
mmu-miR-5128	321022	carnitine deficiency-associated gene expressed in ventricle 3, isoform CRA_b [Mus musculus]
mmu-miR-5128	321007	protein SERAC1 isoform 3 [Mus musculus]
mmu-miR-5128	269328	mucin-15 isoform a precursor [Mus musculus]
mmu-miR-5128	243967	netrin-5 isoform c [Mus musculus]
mmu-miR-5128	243967	netrin-5 isoform a precursor [Mus musculus]
mmu-miR-5128	243967	netrin-5 isoform a precursor [Mus musculus]
mmu-miR-5128	241568	PREDICTED: LOW QUALITY PROTEIN: leucine-rich repeat-containing protein 4C [Monodelphis domestica]
mmu-miR-5128	241568	PREDICTED: LOW QUALITY PROTEIN: leucine-rich repeat-containing protein 4C [Monodelphis domestica]
mmu-miR-5128	241568	PREDICTED: LOW QUALITY PROTEIN: leucine-rich repeat-containing protein 4C [Monodelphis domestica]
mmu-miR-5128	234155	ghrelin O-acyltransferase [Mus musculus]
mmu-miR-5128	232878	zinc finger and SCAN domain-containing protein 22 isoform a [Mus musculus]
mmu-miR-5128	232878	zinc finger and SCAN domain-containing protein 22 isoform a [Mus musculus]
mmu-miR-5128	232878	zinc finger and SCAN domain-containing protein 22 isoform a [Mus musculus]
mmu-miR-5128	232680	-
mmu-miR-5128	229571	TD and POZ domain containing-like isoform 1 [Mus musculus]
mmu-miR-5128	229571	TD and POZ domain containing-like isoform 2 [Mus musculus]
mmu-miR-5128	223435	triple functional domain protein [Mus musculus]
mmu-miR-5128	217356	PREDICTED: transmembrane channel-like protein 8 isoform X3 [Mus musculus]
mmu-miR-5128	217356	transmembrane channel-like protein 8 isoform A [Mus musculus]
mmu-miR-5128	217356	transmembrane channel-like protein 8 isoform A [Mus musculus]
mmu-miR-5128	108071	metabotropic glutamate receptor 5 isoform b precursor [Mus musculus]
mmu-miR-5128	108071	metabotropic glutamate receptor 5 isoform a precursor [Mus musculus]
mmu-miR-5128	102075	puratrophin-1 [Mus musculus]
mmu-miR-5128	94275	mFLJ00163 protein [Mus musculus]
mmu-miR-5128	79233	zinc finger protein 319 [Mus musculus]
mmu-miR-5128	74741	mKIAA0528 protein [Mus musculus]
mmu-miR-5128	72119	TPX2, microtubule-associated protein homolog (Xenopus laevis), isoform CRA_b, partial [Mus musculus]
mmu-miR-5128	72119	TPX2, microtubule-associated protein homolog (Xenopus laevis), isoform CRA_b, partial [Mus musculus]
mmu-miR-5128	72119	TPX2, microtubule-associated protein homolog (Xenopus laevis), isoform CRA_b, partial [Mus musculus]
mmu-miR-5128	72119	TPX2, microtubule-associated protein homolog (Xenopus laevis), isoform CRA_b, partial [Mus musculus]
mmu-miR-5128	71791	carboxypeptidase A4 precursor [Mus musculus]
mmu-miR-5128	70611	mCG20838, isoform CRA_a, partial [Mus musculus]
mmu-miR-5128	70052	-
mmu-miR-5128	68318	-
mmu-miR-5128	67935	carboxylesterase 5A precursor [Mus musculus]
mmu-miR-5128	67848	unnamed protein product [Mus musculus]
mmu-miR-5128	67848	unnamed protein product [Mus musculus]
mmu-miR-5128	66799	ubiquitin-conjugating enzyme E2 W isoform 1 [Mus musculus]
mmu-miR-5128	66799	ubiquitin-conjugating enzyme E2 W isoform 3 [Mus musculus]
mmu-miR-5128	66291	small integral membrane protein 8 [Mus musculus]
mmu-miR-5128	66109	tetraspanin 13, isoform CRA_b, partial [Mus musculus]
mmu-miR-5128	64292	prostaglandin E synthase [Mus musculus]
mmu-miR-5128	58807	solute carrier organic anion transporter family, member 1c1, isoform CRA_a, partial [Mus musculus]
mmu-miR-5128	58807	solute carrier organic anion transporter family, member 1c1, isoform CRA_a, partial [Mus musculus]
mmu-miR-5128	56534	heat shock protein beta-3 [Mus musculus]
mmu-miR-5128	52850	small G protein signaling modulator 1 isoform d [Mus musculus]
mmu-miR-5128	52850	small G protein signaling modulator 1 isoform b [Mus musculus]
mmu-miR-5128	30946	Pro-Pol-dUTPase polyprotein [Mus musculus]
mmu-miR-5128	30936	thymic stromal cotransporter protein [Mus musculus]
mmu-miR-5128	29869	mKIAA0623 protein [Mus musculus]
mmu-miR-5128	26412	mitogen-activated protein kinase kinase kinase kinase 2 isoform 1 [Mus musculus]
mmu-miR-5128	26412	mitogen-activated protein kinase kinase kinase kinase 2 isoform 1 [Mus musculus]
mmu-miR-5128	24013	RecName: Full=Rhodopsin kinase; Short=RK; AltName: Full=G protein-coupled receptor kinase 1; Flags: Precursor
mmu-miR-5128	23955	-
mmu-miR-5128	22415	PREDICTED: proto-oncogene Wnt-3 isoform X2 [Ovis aries musimon]
mmu-miR-5128	22311	vomeronasal 2, receptor 32 precursor [Mus musculus]
mmu-miR-5128	22310	vomeronasal 2, receptor 42 precursor [Mus musculus]
mmu-miR-5128	22084	tuberous sclerosis 2, isoform CRA_c, partial [Mus musculus]
mmu-miR-5128	22084	tuberin isoform 5 [Mus musculus]
mmu-miR-5128	22084	tuberous sclerosis 2, isoform CRA_d, partial [Mus musculus]
mmu-miR-5128	22084	tuberous sclerosis 2, isoform CRA_d, partial [Mus musculus]
mmu-miR-5128	22084	tuberous sclerosis 2, isoform CRA_c, partial [Mus musculus]
mmu-miR-5128	22084	tuberin isoform 3 [Mus musculus]
mmu-miR-5128	22084	tuberous sclerosis 2, isoform CRA_d, partial [Mus musculus]
mmu-miR-5128	22072	anionic trypsin-2 precursor [Mus musculus]
mmu-miR-5128	21941	tumor necrosis factor receptor superfamily member 8 precursor [Mus musculus]
mmu-miR-5128	21869	PREDICTED: homeobox protein Nkx-2.1 isoform X1 [Mus musculus]
mmu-miR-5128	20983	mKIAA1342 protein [Mus musculus]
mmu-miR-5128	20147	retinoschisin precursor [Mus musculus]
mmu-miR-5128	18975	polymerase (DNA directed), gamma, isoform CRA_b, partial [Mus musculus]
mmu-miR-5128	18854	PREDICTED: protein PML isoform X2 [Mus musculus]
mmu-miR-5128	18516	pre-B-cell leukemia transcription factor 3 isoform PBX3a [Mus musculus]
mmu-miR-5128	18516	pre-B-cell leukemia transcription factor 3 [Bos taurus]
mmu-miR-5128	17329	unnamed protein product [Mus musculus]
mmu-miR-5128	16780	laminin subunit beta-3 precursor [Mus musculus]
mmu-miR-5128	16490	potassium voltage-gated channel subfamily A member 2 [Rattus norvegicus]
mmu-miR-5128	13909	carboxylesterase 3B isoform 2 precursor [Mus musculus]
mmu-miR-5128	12902	complement receptor 2, partial [Mus musculus]
mmu-miR-5128	12494	-
mmu-miR-5128	12468	T-complex protein 1 subunit eta [Mus musculus]
mmu-miR-5128	12365	caspase-14 [Mus musculus]
mmu-miR-5128	12351	unnamed protein product [Mus musculus]
mmu-miR-5128	11911	unnamed protein product [Mus musculus]
mmu-miR-5128	11911	unnamed protein product [Mus musculus]
mmu-miR-5128	11835	androgen receptor [Mus musculus]
mmu-miR-7649-3p	668620	-
mmu-miR-7649-3p	574429	pregnancy-specific glycoprotein 26 [Mus musculus]
mmu-miR-7649-3p	545938	zinc finger proten 607 [Mus musculus]
mmu-miR-7649-3p	545925	pregnancy-specific glycoprotein 27 [Mus musculus]
mmu-miR-7649-3p	545662	uncharacterized protein LOC545662 [Mus musculus]
mmu-miR-7649-3p	545471	zinc finger protein 345 [Mus musculus]
mmu-miR-7649-3p	545370	hemicentin-1 precursor [Mus musculus]
mmu-miR-7649-3p	474156	zinc finger and BTB domain-containing protein 9 [Mus musculus]
mmu-miR-7649-3p	446099	NACHT, LRR and PYD domains-containing protein 4E [Mus musculus]
mmu-miR-7649-3p	434459	uncharacterized protein LOC434459 [Mus musculus]
mmu-miR-7649-3p	434437	aminomethyltransferase, mitochondrial precursor [Mus musculus]
mmu-miR-7649-3p	434234	RIKEN cDNA 2610020H08, isoform CRA_d, partial [Mus musculus]
mmu-miR-7649-3p	433864	nucleolar MIF4G domain-containing protein 1 [Mus musculus]
mmu-miR-7649-3p	433386	coiled-coil domain-containing protein 185 [Mus musculus]
mmu-miR-7649-3p	432628	unnamed protein product [Mus musculus]
mmu-miR-7649-3p	432611	dynein intermediate chain 2, axonemal [Mus musculus]
mmu-miR-7649-3p	408065	zinc finger protein 456 [Mus musculus]
mmu-miR-7649-3p	382423	putative ataxin-7-like protein 3B [Mus musculus]
mmu-miR-7649-3p	381680	uncharacterized protein LOC381680 [Mus musculus]
mmu-miR-7649-3p	380855	-
mmu-miR-7649-3p	330662	dedicator of cytokinesis protein 1 [Mus musculus]
mmu-miR-7649-3p	330463	zinc finger protein 471 isoform 1 [Mus musculus]
mmu-miR-7649-3p	320209	-
mmu-miR-7649-3p	271844	cytosolic phospholipase A2 zeta [Mus musculus]
mmu-miR-7649-3p	270152	junctional adhesion molecule-like precursor [Mus musculus]
mmu-miR-7649-3p	268759	9930012K11Rik protein, partial [Mus musculus]
mmu-miR-7649-3p	266645	2-amino-3-carboxymuconate-6-semialdehyde decarboxylase [Mus musculus]
mmu-miR-7649-3p	244556	zinc finger protein 791 [Mus musculus]
mmu-miR-7649-3p	243862	mCG3735, partial [Mus musculus]
mmu-miR-7649-3p	243753	PREDICTED: solute carrier family 23 member 2-like [Cricetulus griseus]
mmu-miR-7649-3p	242377	peptidase M20 domain-containing protein 2 [Mus musculus]
mmu-miR-7649-3p	241694	-
mmu-miR-7649-3p	240667	protein transport protein Sec31B [Mus musculus]
mmu-miR-7649-3p	240327	uncharacterized protein LOC240327 [Mus musculus]
mmu-miR-7649-3p	240047	matrix metalloproteinase-25 isoform 1 precursor [Mus musculus]
mmu-miR-7649-3p	239691	UPF0764 protein C16orf89 homolog precursor [Mus musculus]
mmu-miR-7649-3p	234515	-
mmu-miR-7649-3p	233977	liprin-alpha-1 isoform B [Mus musculus]
mmu-miR-7649-3p	233789	serine/threonine-protein kinase SMG1 [Mus musculus]
mmu-miR-7649-3p	233332	-
mmu-miR-7649-3p	227933	mCG50587 [Mus musculus]
mmu-miR-7649-3p	227631	spermatogenesis- and oogenesis-specific basic helix-loop-helix-containing protein 1 [Mus musculus]
mmu-miR-7649-3p	226517	protein SMG7 isoform 3 [Mus musculus]
mmu-miR-7649-3p	226025	transient receptor potential cation channel subfamily M member 3 isoform e [Mus musculus]
mmu-miR-7649-3p	226025	transient receptor potential cation channel subfamily M member 3 isoform d [Mus musculus]
mmu-miR-7649-3p	226025	transient receptor potential cation channel subfamily M member 3 isoform c [Mus musculus]
mmu-miR-7649-3p	226025	transient receptor potential cation channel subfamily M member 3 isoform b [Mus musculus]
mmu-miR-7649-3p	226025	transient receptor potential cation channel subfamily M member 3 isoform a [Mus musculus]
mmu-miR-7649-3p	223262	PREDICTED: putative mitochondrial import inner membrane translocase subunit Tim8 A-B isoform X2 [Mus musculus]
mmu-miR-7649-3p	217463	sorting nexin 13, isoform CRA_b, partial [Mus musculus]
mmu-miR-7649-3p	216825	mKIAA1063 protein [Mus musculus]
mmu-miR-7649-3p	216739	long-chain-fatty-acid--CoA ligase 6 isoform 1 [Mus musculus]
mmu-miR-7649-3p	212392	coiled-coil domain-containing protein 110 [Mus musculus]
mmu-miR-7649-3p	194352	transient receptor potential cation channel subfamily V member 5 [Mus musculus]
mmu-miR-7649-3p	116837	-
mmu-miR-7649-3p	116837	-
mmu-miR-7649-3p	116837	-
mmu-miR-7649-3p	109676	PREDICTED: ankyrin-2 isoform X26 [Mus musculus]
mmu-miR-7649-3p	108802	calreticulin 4 isoform b precursor [Mus musculus]
mmu-miR-7649-3p	105988	extra spindle poles-like 1 (S. cerevisiae), isoform CRA_b, partial [Mus musculus]
mmu-miR-7649-3p	104082	WD repeat-containing protein 7 [Mus musculus]
mmu-miR-7649-3p	101835	uncharacterized protein LOC101835 [Mus musculus]
mmu-miR-7649-3p	101631	PWWP domain containing 2B [Mus musculus]
mmu-miR-7649-3p	78473	src kinase-associated phosphoprotein 1 isoform 1 [Mus musculus]
mmu-miR-7649-3p	78465	-
mmu-miR-7649-3p	78390	cytosolic phospholipase A2 delta [Mus musculus]
mmu-miR-7649-3p	76954	suppression of tumorigenicity 5 protein isoform 1 [Mus musculus]
mmu-miR-7649-3p	76775	RIKEN cDNA 2410193C02, isoform CRA_a, partial [Mus musculus]
mmu-miR-7649-3p	76441	disheveled-associated activator of morphogenesis 2 [Mus musculus]
mmu-miR-7649-3p	74241	chondroitin sulfate synthase 2 isoform a [Mus musculus]
mmu-miR-7649-3p	74241	DNA segment, Chr 1, Brigham & Women's Genetics 1363 expressed, isoform CRA_b, partial [Mus musculus]
mmu-miR-7649-3p	74044	transcription termination factor 2 [Mus musculus]
mmu-miR-7649-3p	74006	dynamin 1-like, isoform CRA_e, partial [Mus musculus]
mmu-miR-7649-3p	73449	uncharacterized protein LOC73449 [Mus musculus]
mmu-miR-7649-3p	71691	PNMA-like protein 1 [Mus musculus]
mmu-miR-7649-3p	70834	mKIAA0516 protein [Mus musculus]
mmu-miR-7649-3p	70834	mKIAA0516 protein [Mus musculus]
mmu-miR-7649-3p	70834	mKIAA0516 protein [Mus musculus]
mmu-miR-7649-3p	69480	-
mmu-miR-7649-3p	69181	dual specificity tyrosine-phosphorylation-regulated kinase 2 [Mus musculus]
mmu-miR-7649-3p	67991	nucleus accumbens-associated protein 2 isoform 2 [Mus musculus]
mmu-miR-7649-3p	57752	transforming acidic coiled-coil-containing protein 2 isoform c [Mus musculus]
mmu-miR-7649-3p	56220	mKIAA4205 protein [Mus musculus]
mmu-miR-7649-3p	56191	-
mmu-miR-7649-3p	52055	mKIAA0857 protein [Mus musculus]
mmu-miR-7649-3p	23834	cell division control protein 6 homolog isoform a [Mus musculus]
mmu-miR-7649-3p	22367	vaccinia related kinase 1, isoform CRA_c, partial [Mus musculus]
mmu-miR-7649-3p	22367	vaccinia related kinase 1, isoform CRA_b, partial [Mus musculus]
mmu-miR-7649-3p	21356	TAP binding protein, isoform CRA_a, partial [Mus musculus]
mmu-miR-7649-3p	20908	syntaxin-3 isoform B [Mus musculus]
mmu-miR-7649-3p	19188	proteasome activator complex subunit 2 isoform 2 [Mus musculus]
mmu-miR-7649-3p	19091	cGMP-dependent protein kinase 1 alpha isoform [Mus musculus]
mmu-miR-7649-3p	16522	G protein-activated inward rectifier potassium channel 2 isoform Girk2B [Mus musculus]
mmu-miR-7649-3p	16522	PREDICTED: G protein-activated inward rectifier potassium channel 2 isoform X1 [Cercocebus atys]
mmu-miR-7649-3p	14924	membrane-associated guanylate kinase, WW and PDZ domain-containing protein 1 isoform c [Mus musculus]
mmu-miR-7649-3p	13199	dendrin [Mus musculus]
mmu-miR-7649-3p	12695	inaD-like protein isoform 4 [Mus musculus]
mmu-miR-7649-3p	11863	aryl hydrocarbon receptor nuclear translocator isoform a [Mus musculus]
mmu-miR-7649-3p	11641	paralemmin A kinase anchor protein [Mus musculus]
mmu-miR-7649-3p	11641	paralemmin A kinase anchor protein [Mus musculus]
mmu-miR-7649-3p	11517	pituitary adenylate cyclase-activating polypeptide type I receptor isoform 2 precursor [Mus musculus]
mmu-miR-21a-5p	100384868	protocadherin alpha 4-gamma precursor [Mus musculus]
mmu-miR-21a-5p	100038709	PREDICTED: uncharacterized protein LOC104006808 [Pan troglodytes]
mmu-miR-21a-5p	623046	fibrous sheath CABYR-binding protein [Mus musculus]
mmu-miR-21a-5p	619945	unnamed protein product [Mus musculus]
mmu-miR-21a-5p	381511	[Pyruvate dehydrogenase [acetyl-transferring]]-phosphatase 1, mitochondrial isoform d [Mus musculus]
mmu-miR-21a-5p	333193	PREDICTED: proline and serine-rich protein 3 isoform X2 [Mus musculus]
mmu-miR-21a-5p	330171	PREDICTED: BTB/POZ domain-containing adapter for CUL3-mediated RhoA degradation protein 3 isoform X2 [Sus scrofa]
mmu-miR-21a-5p	329324	synaptotagmin XIV, isoform CRA_b, partial [Mus musculus]
mmu-miR-21a-5p	320272	mCG1029224, partial [Mus musculus]
mmu-miR-21a-5p	258120	olfactory receptor 1463 [Mus musculus]
mmu-miR-21a-5p	245026	-
mmu-miR-21a-5p	243374	-
mmu-miR-21a-5p	242584	WD repeat-containing protein 78 [Mus musculus]
mmu-miR-21a-5p	242443	glutamate receptor ionotropic, NMDA 3A isoform 2 precursor [Mus musculus]
mmu-miR-21a-5p	242274	leucine-rich repeat-containing protein 7 isoform 3 [Mus musculus]
mmu-miR-21a-5p	240880	PREDICTED: protein-associating with the carboxyl-terminal domain of ezrin isoform X4 [Mus musculus]
mmu-miR-21a-5p	233046	RAS guanyl-releasing protein 4 isoform 1 [Mus musculus]
mmu-miR-21a-5p	232539	mCG7099, partial [Mus musculus]
mmu-miR-21a-5p	231999	pleckstrin homology domain-containing family A member 8 isoform 1 [Mus musculus]
mmu-miR-21a-5p	229003	helicase with zinc finger domain 2 [Mus musculus]
mmu-miR-21a-5p	224111	UBX domain-containing protein 7 [Mus musculus]
mmu-miR-21a-5p	223669	zinc finger protein 7 [Mus musculus]
mmu-miR-21a-5p	217370	uncharacterized protein C17orf62 homolog isoform 3 [Mus musculus]
mmu-miR-21a-5p	212965	-
mmu-miR-21a-5p	209195	chloride intracellular channel protein 6 [Mus musculus]
mmu-miR-21a-5p	208431	-
mmu-miR-21a-5p	171095	interleukin-17 receptor C isoform 1 precursor [Mus musculus]
mmu-miR-21a-5p	140579	engulfment and cell motility protein 2 isoform 3 [Mus musculus]
mmu-miR-21a-5p	110197	mKIAA4131 protein [Mus musculus]
mmu-miR-21a-5p	108829	mKIAA1380 protein [Mus musculus]
mmu-miR-21a-5p	108689	CST complex subunit STN1 [Mus musculus]
mmu-miR-21a-5p	108686	girdin [Mus musculus]
mmu-miR-21a-5p	107652	-
mmu-miR-21a-5p	105855	NCK associated protein 1 like, isoform CRA_b, partial [Mus musculus]
mmu-miR-21a-5p	104943	protein FAM110C [Mus musculus]
mmu-miR-21a-5p	104799	expressed sequence AI413782, isoform CRA_f, partial [Mus musculus]
mmu-miR-21a-5p	98432	-
mmu-miR-21a-5p	85305	mCG141545, isoform CRA_c, partial [Mus musculus]
mmu-miR-21a-5p	83398	Ndst3 protein [Mus musculus]
mmu-miR-21a-5p	83398	mCG21053, isoform CRA_a [Mus musculus]
mmu-miR-21a-5p	80515	-
mmu-miR-21a-5p	80297	spectrin beta 4, isoform CRA_a, partial [Mus musculus]
mmu-miR-21a-5p	76872	-
mmu-miR-21a-5p	75796	chromodomain Y-like protein 2 [Mus musculus]
mmu-miR-21a-5p	74403	-
mmu-miR-21a-5p	74306	serine protease 46 [Mus musculus]
mmu-miR-21a-5p	73856	mCG50628 [Mus musculus]
mmu-miR-21a-5p	73852	DNA segment, Chr 3, ERATO Doi 751, expressed, isoform CRA_c [Mus musculus]
mmu-miR-21a-5p	73750	mKIAA1526 protein [Mus musculus]
mmu-miR-21a-5p	72085	O-sialoglycoprotein endopeptidase-like 1, isoform CRA_b, partial [Mus musculus]
mmu-miR-21a-5p	72085	O-sialoglycoprotein endopeptidase-like 1, isoform CRA_b, partial [Mus musculus]
mmu-miR-21a-5p	72085	O-sialoglycoprotein endopeptidase-like 1, isoform CRA_b, partial [Mus musculus]
mmu-miR-21a-5p	71893	NADPH oxidase organizer 1, isoform CRA_b, partial [Mus musculus]
mmu-miR-21a-5p	70594	-
mmu-miR-21a-5p	69938	mKIAA0193 protein [Mus musculus]
mmu-miR-21a-5p	67604	-
mmu-miR-21a-5p	67586	PREDICTED: UBX domain-containing protein 11 isoform X1 [Mus musculus]
mmu-miR-21a-5p	67054	multifunctional protein ADE2 [Mus musculus]
mmu-miR-21a-5p	66733	-
mmu-miR-21a-5p	66626	cell death-inducing p53-target protein 1 [Mus musculus]
mmu-miR-21a-5p	66144	PREDICTED: V-type proton ATPase subunit F [Pan paniscus]
mmu-miR-21a-5p	58226	voltage-dependent T-type calcium channel subunit alpha-1H isoform 1 [Mus musculus]
mmu-miR-21a-5p	58184	cell differentiation protein RCD1 homolog isoform 2 [Homo sapiens]
mmu-miR-21a-5p	56876	-
mmu-miR-21a-5p	54645	unnamed protein product [Mus musculus]
mmu-miR-21a-5p	54375	PREDICTED: antizyme inhibitor 1 isoform X1 [Mus musculus]
mmu-miR-21a-5p	52357	protein WWC2 [Mus musculus]
mmu-miR-21a-5p	51938	coiled-coil domain-containing protein 39 [Mus musculus]
mmu-miR-21a-5p	50912	-
mmu-miR-21a-5p	26409	mitogen-activated protein kinase kinase kinase 7 isoform A [Mus musculus]
mmu-miR-21a-5p	23856	-
mmu-miR-21a-5p	22169	UMP-CMP kinase 2, mitochondrial precursor [Mus musculus]
mmu-miR-21a-5p	22138	-
mmu-miR-21a-5p	22138	-
mmu-miR-21a-5p	22061	PREDICTED: tumor protein 63 isoform X2 [Ovis aries]
mmu-miR-21a-5p	21810	transforming growth factor-beta-induced protein ig-h3 precursor [Mus musculus]
mmu-miR-21a-5p	21379	mCG21397, isoform CRA_a, partial [Mus musculus]
mmu-miR-21a-5p	20264	-
mmu-miR-21a-5p	19273	receptor-type tyrosine-protein phosphatase U isoform 1 precursor [Mus musculus]
mmu-miR-21a-5p	18717	phosphatidylinositol 4-phosphate 5-kinase type-1 gamma isoform 1 [Mus musculus]
mmu-miR-21a-5p	18578	PREDICTED: cAMP-specific 3',5'-cyclic phosphodiesterase 4B isoform X3 [Mus musculus]
mmu-miR-21a-5p	18475	-
mmu-miR-21a-5p	17260	myocyte-specific enhancer factor 2C isoform 2 [Mus musculus]
mmu-miR-21a-5p	17248	-
mmu-miR-21a-5p	17232	mast cell protease 9 precursor [Mus musculus]
mmu-miR-21a-5p	17096	-
mmu-miR-21a-5p	16574	mKIAA0531 protein [Mus musculus]
mmu-miR-21a-5p	16558	kinesin-like protein KIF16B [Mus musculus]
mmu-miR-21a-5p	16399	integrin alpha-IIb precursor [Mus musculus]
mmu-miR-21a-5p	16392	Insulin enhancer protein ISL-1, partial [Bos mutus]
mmu-miR-21a-5p	16363	PREDICTED: interferon regulatory factor 2 isoform X2 [Mus musculus]
mmu-miR-21a-5p	16211	PREDICTED: importin subunit beta-1 [Capra hircus]
mmu-miR-21a-5p	15206	transcription factor HES-2 [Mus musculus]
mmu-miR-21a-5p	14559	ceramide synthase 1 [Mus musculus]
mmu-miR-21a-5p	13850	bifunctional epoxide hydrolase 2 isoform c precursor [Mus musculus]
mmu-miR-21a-5p	13138	-
mmu-miR-21a-5p	12822	collagen alpha-1(XVIII) chain isoform 1 precursor [Mus musculus]
mmu-miR-21a-5p	12577	cyclin-dependent kinase inhibitor 1C isoform 1 [Mus musculus]
mmu-miR-21a-5p	11988	PREDICTED: cationic amino acid transporter 2 isoform X3 [Mus musculus]
mmu-miR-21a-5p	11549	alpha-1A adrenergic receptor isoform 1 [Mus musculus]
mmu-miR-212-5p	667772	myosin-15 [Mus musculus]
mmu-miR-212-5p	434215	-
mmu-miR-212-5p	433752	uncharacterized protein LOC433752 [Mus musculus]
mmu-miR-212-5p	432736	vomeronasal 1 receptor 209 [Mus musculus]
mmu-miR-212-5p	432735	vomeronasal 1 receptor 207, pseudogene [Mus musculus]
mmu-miR-212-5p	386463	PREDICTED: corneodesmosin isoform X1 [Mus musculus]
mmu-miR-212-5p	382018	protein unc-13 homolog A [Mus musculus]
mmu-miR-212-5p	381353	uncharacterized protein C9orf172 homolog [Mus musculus]
mmu-miR-212-5p	381067	zinc finger protein 229 [Mus musculus]
mmu-miR-212-5p	381022	histone-lysine N-methyltransferase 2D [Mus musculus]
mmu-miR-212-5p	330953	potassium/sodium hyperpolarization-activated cyclic nucleotide-gated channel 4 [Mus musculus]
mmu-miR-212-5p	329581	baculoviral IAP repeat-containing protein 7 [Mus musculus]
mmu-miR-212-5p	328580	gamma-tubulin complex component 6 [Mus musculus]
mmu-miR-212-5p	320563	immunoglobulin superfamily containing leucine-rich repeat protein 2 isoform a [Mus musculus]
mmu-miR-212-5p	320563	immunoglobulin superfamily containing leucine-rich repeat protein 2 isoform a [Mus musculus]
mmu-miR-212-5p	277468	zinc transporter ZIP12 precursor [Mus musculus]
mmu-miR-212-5p	269016	SH3 domain containing ring finger 2, isoform CRA_c, partial [Mus musculus]
mmu-miR-212-5p	260315	neuron navigator 3 [Mus musculus]
mmu-miR-212-5p	258216	olfactory receptor 1034 [Mus musculus]
mmu-miR-212-5p	244668	signal-induced proliferation-associated 1-like protein 2 [Mus musculus]
mmu-miR-212-5p	242748	patched domain-containing protein 2 [Mus musculus]
mmu-miR-212-5p	240892	inactive dual specificity phosphatase 27 [Mus musculus]
mmu-miR-212-5p	240892	inactive dual specificity phosphatase 27 [Mus musculus]
mmu-miR-212-5p	240255	probable ATP-dependent RNA helicase YTHDC2 [Mus musculus]
mmu-miR-212-5p	233529	PREDICTED: BTB/POZ domain-containing protein KCTD14 isoform X2 [Mus musculus]
mmu-miR-212-5p	233529	-
mmu-miR-212-5p	233020	homeodomain-interacting protein kinase 4 [Mus musculus]
mmu-miR-212-5p	231861	trinucleotide repeat-containing gene 18 protein isoform A [Mus musculus]
mmu-miR-212-5p	231630	adenosine monophosphate-protein transferase FICD [Mus musculus]
mmu-miR-212-5p	230971	multiple epidermal growth factor-like domains protein 6 precursor [Mus musculus]
mmu-miR-212-5p	230872	PREDICTED: rootletin isoform X2 [Mus musculus]
mmu-miR-212-5p	229389	otolin-1 precursor [Mus musculus]
mmu-miR-212-5p	227632	potassium channel subfamily T member 1 isoform 2 [Mus musculus]
mmu-miR-212-5p	224647	-
mmu-miR-212-5p	224647	-
mmu-miR-212-5p	224020	RecName: Full=Phosphatidylinositol 4-kinase alpha; Short=PI4-kinase alpha; Short=PI4K-alpha; Short=PtdIns-4-kinase alpha
mmu-miR-212-5p	218877	semaphorin-3G precursor [Mus musculus]
mmu-miR-212-5p	216850	lysine-specific demethylase 6B [Mus musculus]
mmu-miR-212-5p	212528	unnamed protein product [Mus musculus]
mmu-miR-212-5p	212528	tRNA (guanine(26)-N(2))-dimethyltransferase isoform 1 [Mus musculus]
mmu-miR-212-5p	210356	nck-associated protein 5 isoform 1 [Mus musculus]
mmu-miR-212-5p	108000	centromere protein F [Mus musculus]
mmu-miR-212-5p	105988	extra spindle poles-like 1 (S. cerevisiae), isoform CRA_b, partial [Mus musculus]
mmu-miR-212-5p	104099	unnamed protein product [Mus musculus]
mmu-miR-212-5p	100182	AT-hook-containing transcription factor [Mus musculus]
mmu-miR-212-5p	94040	calmin isoform b [Mus musculus]
mmu-miR-212-5p	78913	mKIAA0714 protein [Mus musculus]
mmu-miR-212-5p	77087	ankyrin repeat domain-containing protein 11 [Mus musculus]
mmu-miR-212-5p	76804	lysine-specific demethylase 4C isoform 2 [Mus musculus]
mmu-miR-212-5p	76686	PREDICTED: CAP-Gly domain-containing linker protein 3 isoform X1 [Equus asinus]
mmu-miR-212-5p	76499	CLIP-associating protein 2 isoform b [Mus musculus]
mmu-miR-212-5p	74480	protein Smaug homolog 1 isoform 1 [Mus musculus]
mmu-miR-212-5p	74480	protein Smaug homolog 1 isoform 1 [Mus musculus]
mmu-miR-212-5p	74392	cytospin-A isoform a [Mus musculus]
mmu-miR-212-5p	73712	Dermokine [Mus musculus]
mmu-miR-212-5p	73712	dermokine isoform c precursor [Mus musculus]
mmu-miR-212-5p	72775	mCG18528, isoform CRA_a, partial [Mus musculus]
mmu-miR-212-5p	72775	Fanconi anemia group E protein isoform 1 [Mus musculus]
mmu-miR-212-5p	71750	mKIAA1002 protein [Mus musculus]
mmu-miR-212-5p	71729	regulator of G-protein signaling 12 isoform B [Mus musculus]
mmu-miR-212-5p	70769	nucleolar and coiled-body phosphoprotein 1 isoform C [Mus musculus]
mmu-miR-212-5p	70769	nucleolar and coiled-body phosphoprotein 1 isoform C [Mus musculus]
mmu-miR-212-5p	70769	nucleolar and coiled-body phosphoprotein 1 isoform C [Mus musculus]
mmu-miR-212-5p	69439	PREDICTED: uncharacterized protein LOC69439 isoform X3 [Mus musculus]
mmu-miR-212-5p	67434	ankyrin repeat domain-containing protein 33B isoform 3 [Mus musculus]
mmu-miR-212-5p	66871	copine-8 isoform 2 [Mus musculus]
mmu-miR-212-5p	66479	uncharacterized protein LOC66479 isoform 1 [Mus musculus]
mmu-miR-212-5p	63955	CDK5 and ABL1 enzyme substrate 1 isoform 1 [Mus musculus]
mmu-miR-212-5p	58222	ras-related protein Rab-37 isoform 2 [Mus musculus]
mmu-miR-212-5p	56349	neuroepithelial cell-transforming gene 1 protein isoform 2 [Mus musculus]
mmu-miR-212-5p	54445	protein unc-93 homolog B1 isoform b [Mus musculus]
mmu-miR-212-5p	52065	malignant fibrous histiocytoma-amplified sequence 1 homolog [Mus musculus]
mmu-miR-212-5p	26903	dysferlin isoform 2 [Mus musculus]
mmu-miR-212-5p	22196	mCG17660, isoform CRA_c, partial [Mus musculus]
mmu-miR-212-5p	20897	stimulated by retinoic acid gene 6 protein [Mus musculus]
mmu-miR-212-5p	19377	retinoic acid-induced protein 1 [Mus musculus]
mmu-miR-212-5p	18810	plectin 1, isoform CRA_b [Mus musculus]
mmu-miR-212-5p	18744	E3 ubiquitin-protein ligase Praja-1 isoform 3 [Mus musculus]
mmu-miR-212-5p	18212	BDNF/NT-3 growth factors receptor isoform a precursor [Mus musculus]
mmu-miR-212-5p	17967	neural cell adhesion molecule 1, isoform CRA_d, partial [Mus musculus]
mmu-miR-212-5p	17967	-
mmu-miR-212-5p	17929	myomesin-1 isoform 2 [Mus musculus]
mmu-miR-212-5p	17910	unconventional myosin-XV isoform 3 [Mus musculus]
mmu-miR-212-5p	17754	microtubule-associated protein 1A isoform 1 [Mus musculus]
mmu-miR-212-5p	17536	PREDICTED: homeobox protein Meis2 isoform X1 [Mandrillus leucophaeus]
mmu-miR-212-5p	17536	myeloid ecotropic viral integration site-related gene 1, isoform CRA_b, partial [Mus musculus]
mmu-miR-212-5p	17082	interleukin-1 receptor-like 1 isoform a precursor [Mus musculus]
mmu-miR-212-5p	16909	rhombotin-2 isoform 1 [Mus musculus]
mmu-miR-212-5p	16909	PREDICTED: rhombotin-2 [Cavia porcellus]
mmu-miR-212-5p	16909	rhombotin-2 isoform 1 [Mus musculus]
mmu-miR-212-5p	16776	laminin subunit alpha-5 precursor [Mus musculus]
mmu-miR-212-5p	14918	-
mmu-miR-212-5p	13017	C-terminal-binding protein 2 isoform 1 [Mus musculus]
mmu-miR-212-5p	12325	Ca2+/calmodulin-dependent protein kinase II gamma-c [Rattus sp.]
mmu-miR-212-5p	12325	calcium/calmodulin-dependent protein kinase type II subunit gamma isoform 3 [Homo sapiens]
mmu-miR-212-5p	12288	-
mmu-miR-212-5p	12288	voltage-dependent L-type calcium channel subunit alpha-1C isoform 3 [Mus musculus]
mmu-miR-212-5p	12288	voltage-dependent L-type calcium channel subunit alpha-1C isoform 2 [Mus musculus]
mmu-miR-212-5p	12287	voltage-dependent N-type calcium channel subunit alpha-1B isoform 1 [Mus musculus]
mmu-miR-212-5p	11433	tartrate-resistant acid phosphatase type 5 precursor [Mus musculus]
mmu-miR-212-5p	11433	tartrate-resistant acid phosphatase type 5 precursor [Mus musculus]
mmu-miR-132-3p	671535	poly [ADP-ribose] polymerase 10 [Mus musculus]
mmu-miR-132-3p	671535	poly [ADP-ribose] polymerase 10 [Mus musculus]
mmu-miR-132-3p	654470	tectonic-1 precursor [Mus musculus]
mmu-miR-132-3p	654470	tectonic-1 precursor [Mus musculus]
mmu-miR-132-3p	442827	PREDICTED: ras-related protein Rab-44 isoform X3 [Mus musculus]
mmu-miR-132-3p	433809	RING finger protein 207 [Mus musculus]
mmu-miR-132-3p	328263	-
mmu-miR-132-3p	320939	unnamed protein product [Mus musculus]
mmu-miR-132-3p	320739	-
mmu-miR-132-3p	320538	-
mmu-miR-132-3p	269999	protein orai-3 [Mus musculus]
mmu-miR-132-3p	269437	-
mmu-miR-132-3p	268903	nuclear receptor-interacting protein 1 [Mus musculus]
mmu-miR-132-3p	243914	unnamed protein product [Mus musculus]
mmu-miR-132-3p	237858	tumor suppressor candidate 5, partial [Mus musculus]
mmu-miR-132-3p	237782	Smith-Magenis syndrome chromosomal region candidate gene 8 protein homolog isoform 1 [Mus musculus]
mmu-miR-132-3p	237782	Smith-Magenis syndrome chromosomal region candidate gene 8 protein homolog isoform 1 [Mus musculus]
mmu-miR-132-3p	235604	CaM kinase-like vesicle-associated, partial [Mus musculus]
mmu-miR-132-3p	233115	transmembrane protein [Mus musculus]
mmu-miR-132-3p	231147	SH3 domain and tetratricopeptide repeat-containing protein 1 [Mus musculus]
mmu-miR-132-3p	230866	C230096C10Rik protein [Mus musculus]
mmu-miR-132-3p	230866	ER membrane protein complex subunit 1 isoform 2 precursor [Mus musculus]
mmu-miR-132-3p	228139	-
mmu-miR-132-3p	208285	cytochrome P450, family 4, subfamily f, polypeptide 17 precursor [Mus musculus]
mmu-miR-132-3p	207227	syntaxin-binding protein 5-like isoform xb [Mus musculus]
mmu-miR-132-3p	207227	syntaxin-binding protein 5-like isoform m [Mus musculus]
mmu-miR-132-3p	207227	syntaxin-binding protein 5-like isoform b [Mus musculus]
mmu-miR-132-3p	207227	syntaxin-binding protein 5-like isoform s [Mus musculus]
mmu-miR-132-3p	142681	-
mmu-miR-132-3p	114141	claudin-16 [Mus musculus]
mmu-miR-132-3p	108946	zinc finger, ZZ domain containing 3, isoform CRA_b, partial [Mus musculus]
mmu-miR-132-3p	108946	mFLJ00191 protein [Mus musculus]
mmu-miR-132-3p	102632	acyl-CoA dehydrogenase family member 11 [Mus musculus]
mmu-miR-132-3p	100604	volume-regulated anion channel subunit LRRC8C [Mus musculus]
mmu-miR-132-3p	100019	midasin [Mus musculus]
mmu-miR-132-3p	99382	ankyrin repeat and BTB (POZ) domain containing 2, isoform CRA_b, partial [Mus musculus]
mmu-miR-132-3p	75986	agmatinase, mitochondrial precursor [Mus musculus]
mmu-miR-132-3p	75605	jumonji, AT rich interactive domain 1B (Rbp2 like), isoform CRA_a, partial [Mus musculus]
mmu-miR-132-3p	75219	dual specificity phosphatase 18, partial [Mus musculus]
mmu-miR-132-3p	75122	zinc finger C2HC domain-containing protein 1B [Mus musculus]
mmu-miR-132-3p	74145	coagulation factor XIII, A1 subunit, isoform CRA_c, partial [Mus musculus]
mmu-miR-132-3p	74145	coagulation factor XIII, A1 subunit, isoform CRA_c, partial [Mus musculus]
mmu-miR-132-3p	74121	acyl-coenzyme A oxidase-like protein [Mus musculus]
mmu-miR-132-3p	74094	tight junction-associated protein 1 [Mus musculus]
mmu-miR-132-3p	74094	tight junction-associated protein 1 [Mus musculus]
mmu-miR-132-3p	74094	tight junction-associated protein 1 [Mus musculus]
mmu-miR-132-3p	74094	tight junction-associated protein 1 [Mus musculus]
mmu-miR-132-3p	73144	-
mmu-miR-132-3p	73144	-
mmu-miR-132-3p	72230	zinc finger protein 558 [Mus musculus]
mmu-miR-132-3p	71310	-
mmu-miR-132-3p	70984	RIKEN cDNA 4931406C07, isoform CRA_b, partial [Mus musculus]
mmu-miR-132-3p	69675	-
mmu-miR-132-3p	68652	TGF-beta-activated kinase 1 and MAP3K7-binding protein 2 [Mus musculus]
mmu-miR-132-3p	68133	glycine cleavage system H protein, mitochondrial precursor [Mus musculus]
mmu-miR-132-3p	68097	dynein, light chain, LC8-type 2, isoform CRA_a, partial [Homo sapiens]
mmu-miR-132-3p	68097	PREDICTED: dynein light chain 2, cytoplasmic isoform X1 [Odobenus rosmarus divergens]
mmu-miR-132-3p	68097	Dynein light chain 2, cytoplasmic [Fukomys damarensis]
mmu-miR-132-3p	67980	mCG10526, isoform CRA_b, partial [Mus musculus]
mmu-miR-132-3p	67809	Family with sequence similarity 82, member A2, partial [Mus musculus]
mmu-miR-132-3p	67475	-
mmu-miR-132-3p	67236	RIKEN cDNA 2810452K22, isoform CRA_a, partial [Mus musculus]
mmu-miR-132-3p	67236	cyclin-dependent kinase 2-interacting protein isoform 1 [Mus musculus]
mmu-miR-132-3p	66046	-
mmu-miR-132-3p	63828	fructosamine-3-kinase isoform b [Mus musculus]
mmu-miR-132-3p	58226	voltage-dependent T-type calcium channel subunit alpha-1H isoform 1 [Mus musculus]
mmu-miR-132-3p	58226	voltage-dependent T-type calcium channel subunit alpha-1H isoform 2 [Mus musculus]
mmu-miR-132-3p	57344	arsenite methyltransferase [Mus musculus]
mmu-miR-132-3p	56747	seizure 6-like protein isoform 2 precursor [Mus musculus]
mmu-miR-132-3p	56747	seizure 6-like protein isoform 3 precursor [Mus musculus]
mmu-miR-132-3p	56747	seizure 6-like protein isoform 1 precursor [Mus musculus]
mmu-miR-132-3p	54122	ubiquitin-conjugating enzyme E2 variant 3 [Mus musculus]
mmu-miR-132-3p	53424	translin-associated protein X [Mus musculus]
mmu-miR-132-3p	52132	coiled-coil domain-containing protein 97 [Mus musculus]
mmu-miR-132-3p	26431	-
mmu-miR-132-3p	26431	-
mmu-miR-132-3p	26431	-
mmu-miR-132-3p	20358	semaphorin-6A isoform 1 precursor [Mus musculus]
mmu-miR-132-3p	20358	-
mmu-miR-132-3p	20357	sema domain, seven thrombospondin repeats (type 1 and type 1-like), transmembrane domain (TM) and short cytoplasmic domain, (semaphorin) 5B, isoform CRA_d, partial [Mus musculus]
mmu-miR-132-3p	19305	peroxisome biogenesis factor 5, isoform CRA_c, partial [Mus musculus]
mmu-miR-132-3p	19305	peroxisomal biogenesis factor 5 isoform 1 [Mus musculus]
mmu-miR-132-3p	19305	peroxisomal biogenesis factor 5 isoform 1 [Mus musculus]
mmu-miR-132-3p	19305	peroxisome biogenesis factor 5, isoform CRA_c, partial [Mus musculus]
mmu-miR-132-3p	18585	-
mmu-miR-132-3p	18585	phosphodiesterase 9A, isoform CRA_b, partial [Mus musculus]
mmu-miR-132-3p	18377	oligodendrocyte-myelin glycoprotein precursor [Mus musculus]
mmu-miR-132-3p	17347	MAP kinase-interacting serine/threonine-protein kinase 2 [Mus musculus]
mmu-miR-132-3p	17064	complement component C1q receptor precursor [Mus musculus]
mmu-miR-132-3p	16494	potassium voltage-gated channel subfamily A member 6 [Mus musculus]
mmu-miR-132-3p	16162	interleukin-12 receptor subunit beta-2 isoform 1 precursor [Mus musculus]
mmu-miR-132-3p	14919	guanylyl cyclase GC-E precursor [Mus musculus]
mmu-miR-132-3p	14426	polypeptide N-acetylgalactosaminyltransferase 4 [Mus musculus]
mmu-miR-132-3p	14422	beta-1,4 N-acetylgalactosaminyltransferase 2 [Mus musculus]
mmu-miR-132-3p	12759	-
mmu-miR-132-3p	12385	Chain A, Crystal Structure Of Full-length Mouse Alphae-catenin
mmu-miR-132-3p	11513	adenylate cyclase type 7 [Mus musculus]
mmu-miR-132-3p	11513	adenylate cyclase type 7 [Mus musculus]
mmu-miR-132-3p	11513	adenylate cyclase type 7 [Mus musculus]
mmu-miR-132-3p	11513	adenylate cyclase type 7 [Mus musculus]
mmu-miR-34c-5p	100504234	coiled-coil domain-containing protein 170 [Mus musculus]
mmu-miR-34c-5p	100270744	BTB/POZ domain-containing protein 18 [Mus musculus]
mmu-miR-34c-5p	100044509	transforming growth factor-beta receptor type 3-like protein precursor [Mus musculus]
mmu-miR-34c-5p	637093	uncharacterized protein LOC637093 [Mus musculus]
mmu-miR-34c-5p	629499	protein MROH8 [Mus musculus]
mmu-miR-34c-5p	545192	BAI1-associated protein 3 [Mus musculus]
mmu-miR-34c-5p	434341	protein NLRC5 [Mus musculus]
mmu-miR-34c-5p	408193	OTU domain-containing protein 6A [Mus musculus]
mmu-miR-34c-5p	381269	melanoregulin [Mus musculus]
mmu-miR-34c-5p	380753	PREDICTED: ataxin-7-like protein 1 isoform X5 [Mus musculus]
mmu-miR-34c-5p	347722	arf-GAP with GTPase, ANK repeat and PH domain-containing protein 1 isoform 2 [Mus musculus]
mmu-miR-34c-5p	327799	ubiquitin carboxyl-terminal hydrolase 44 isoform 1 [Mus musculus]
mmu-miR-34c-5p	320429	TPR and ankyrin repeat-containing protein 1 [Mus musculus]
mmu-miR-34c-5p	269389	TOX high mobility group box family member 2 [Mus musculus]
mmu-miR-34c-5p	269233	-
mmu-miR-34c-5p	268345	potassium voltage gated channel, Shaw-related subfamily, member 2, isoform CRA_e, partial [Mus musculus]
mmu-miR-34c-5p	259143	olfactory receptor 503 [Mus musculus]
mmu-miR-34c-5p	242748	patched domain-containing protein 2 [Mus musculus]
mmu-miR-34c-5p	242409	mCG19281, isoform CRA_b, partial [Mus musculus]
mmu-miR-34c-5p	241263	probable G-protein coupled receptor 158 precursor [Mus musculus]
mmu-miR-34c-5p	240667	protein transport protein Sec31B [Mus musculus]
mmu-miR-34c-5p	238393	-
mmu-miR-34c-5p	238393	serine protease inhibitor A3F [Mus musculus]
mmu-miR-34c-5p	238393	serine protease inhibitor A3F [Mus musculus]
mmu-miR-34c-5p	236732	PREDICTED: RNA-binding protein 10 isoform X3 [Cricetulus griseus]
mmu-miR-34c-5p	230393	focadhesin [Mus musculus]
mmu-miR-34c-5p	229722	PREDICTED: UPF0577 protein KIAA1324 isoform X2 [Mus musculus]
mmu-miR-34c-5p	228998	-
mmu-miR-34c-5p	228998	ADP-ribosylation factor GTPase activating protein 1, isoform CRA_f, partial [Mus musculus]
mmu-miR-34c-5p	228998	ADP-ribosylation factor GTPase activating protein 1, isoform CRA_f, partial [Mus musculus]
mmu-miR-34c-5p	228998	ADP-ribosylation factor GTPase activating protein 1, isoform CRA_c, partial [Mus musculus]
mmu-miR-34c-5p	228998	ADP-ribosylation factor GTPase activating protein 1, isoform CRA_c, partial [Mus musculus]
mmu-miR-34c-5p	223989	meiosis arrest female protein 1 [Mus musculus]
mmu-miR-34c-5p	212937	mFLJ00292 protein [Mus musculus]
mmu-miR-34c-5p	192197	breast carcinoma-amplified sequence 3 homolog isoform b [Mus musculus]
mmu-miR-34c-5p	140477	PaxB [Mus musculus]
mmu-miR-34c-5p	109323	PREDICTED: complement C1q tumor necrosis factor-related protein 7 isoform X3 [Rattus norvegicus]
mmu-miR-34c-5p	108655	forkhead box protein P1 isoform 2 [Mus musculus]
mmu-miR-34c-5p	78390	cytosolic phospholipase A2 delta [Mus musculus]
mmu-miR-34c-5p	76561	sorting nexin-7 isoform 2 [Mus musculus]
mmu-miR-34c-5p	76510	trafficking protein particle complex subunit 9 isoform 4 [Mus musculus]
mmu-miR-34c-5p	75799	-
mmu-miR-34c-5p	74734	rho-related GTP-binding protein RhoH precursor [Mus musculus]
mmu-miR-34c-5p	74006	dynamin 1-like, isoform CRA_e, partial [Mus musculus]
mmu-miR-34c-5p	70967	-
mmu-miR-34c-5p	70834	mKIAA0516 protein [Mus musculus]
mmu-miR-34c-5p	70834	C-Jun-amino-terminal kinase-interacting protein 4 isoform 6 [Mus musculus]
mmu-miR-34c-5p	70834	-
mmu-miR-34c-5p	70834	mKIAA0516 protein [Mus musculus]
mmu-miR-34c-5p	70834	mKIAA0516 protein [Mus musculus]
mmu-miR-34c-5p	70834	mKIAA0516 protein [Mus musculus]
mmu-miR-34c-5p	70598	filamin-A-interacting protein 1 [Mus musculus]
mmu-miR-34c-5p	69743	-
mmu-miR-34c-5p	69228	unnamed protein product [Mus musculus]
mmu-miR-34c-5p	69038	Transmembrane protein 258, partial [Cuculus canorus]
mmu-miR-34c-5p	68925	mKIAA1403 protein [Mus musculus]
mmu-miR-34c-5p	68501	PREDICTED: E3 SUMO-protein ligase NSE2 isoform X2 [Mus musculus]
mmu-miR-34c-5p	67399	-
mmu-miR-34c-5p	66610	phosphoethanolamine/phosphocholine phosphatase [Rattus norvegicus]
mmu-miR-34c-5p	59008	mCG11117, isoform CRA_b, partial [Mus musculus]
mmu-miR-34c-5p	58869	PEX5-related protein isoform 1 [Mus musculus]
mmu-miR-34c-5p	54721	non-receptor tyrosine-protein kinase TYK2 isoform 1 [Mus musculus]
mmu-miR-34c-5p	53418	PREDICTED: beta-1,4-galactosyltransferase 2, partial [Capra hircus]
mmu-miR-34c-5p	52028	mCG8379 [Mus musculus]
mmu-miR-34c-5p	22232	unnamed protein product [Mus musculus]
mmu-miR-34c-5p	22201	-
mmu-miR-34c-5p	20469	mKIAA4074 protein [Mus musculus]
mmu-miR-34c-5p	20469	mKIAA4074 protein [Mus musculus]
mmu-miR-34c-5p	20469	mKIAA4074 protein [Mus musculus]
mmu-miR-34c-5p	20363	-
mmu-miR-34c-5p	19730	ral guanine nucleotide dissociation stimulator isoform 2 [Mus musculus]
mmu-miR-34c-5p	19730	ral guanine nucleotide dissociation stimulator isoform 1 [Mus musculus]
mmu-miR-34c-5p	19730	mKIAA1308 protein [Mus musculus]
mmu-miR-34c-5p	18749	cAMP-dependent protein kinase catalytic subunit beta isoform 4 [Mus musculus]
mmu-miR-34c-5p	18749	cAMP-dependent protein kinase catalytic subunit beta isoform 3 [Mus musculus]
mmu-miR-34c-5p	18619	proenkephalin-A precursor [Mus musculus]
mmu-miR-34c-5p	18044	CCAAT-binding protein [Homo sapiens]
mmu-miR-34c-5p	15288	porphobilinogen deaminase (housekeeping) [Mus musculus]
mmu-miR-34c-5p	14810	glutamate receptor ionotropic, NMDA 1 isoform 3 precursor [Mus musculus]
mmu-miR-34c-5p	14810	glutamate receptor ionotropic, NMDA 1 isoform 2 [Mus musculus]
mmu-miR-34c-5p	14230	peptidyl-prolyl cis-trans isomerase FKBP10 isoform 2 precursor [Mus musculus]
mmu-miR-34c-5p	14182	PREDICTED: fibroblast growth factor receptor 1 isoform X1 [Nannospalax galili]
mmu-miR-34c-5p	14007	-
mmu-miR-34c-5p	14007	-
mmu-miR-34c-5p	14007	-
mmu-miR-34c-5p	14007	-
mmu-miR-34c-5p	14007	-
mmu-miR-34c-5p	13972	mKIAA1645 protein [Mus musculus]
mmu-miR-34c-5p	13866	-
mmu-miR-34c-5p	13813	-
mmu-miR-34c-5p	13593	transcription factor COE3 [Rattus norvegicus]
mmu-miR-34c-5p	13593	transcription factor COE3 isoform 2 [Mus musculus]
mmu-miR-34c-5p	13026	choline-phosphate cytidylyltransferase A [Mus musculus]
mmu-miR-34c-5p	13026	choline-phosphate cytidylyltransferase A [Mus musculus]
mmu-miR-34c-5p	12846	catechol O-methyltransferase [Mus musculus]
mmu-miR-34c-5p	12521	CD82 antigen [Mus musculus]
mmu-miR-34c-5p	12311	calcitonin receptor isoform 1a precursor [Mus musculus]
mmu-miR-34c-5p	12265	MHC class II transactivator isoform 3 [Mus musculus]
mmu-miR-34c-5p	12265	MHC class II transactivator isoform 1 [Mus musculus]
mmu-miR-34c-5p	11519	beta-adducin isoform 2 [Mus musculus]
mmu-miR-34c-5p	11350	tyrosine-protein kinase ABL1 isoform a [Mus musculus]
mmu-miR-146b-5p	102634431	mCG145421, partial [Mus musculus]
mmu-miR-146b-5p	100503043	armadillo repeat-containing X-linked protein 4 [Mus musculus]
mmu-miR-146b-5p	667728	PREDICTED: histone H2A type 1-H-like isoform X1 [Sus scrofa]
mmu-miR-146b-5p	664862	putative seven pass transmembrane protein [Mus musculus]
mmu-miR-146b-5p	664702	mCG125477, isoform CRA_c, partial [Mus musculus]
mmu-miR-146b-5p	545280	mCG144818, partial [Mus musculus]
mmu-miR-146b-5p	407821	E3 ubiquitin-protein ligase ZNRF3 isoform 2 [Mus musculus]
mmu-miR-146b-5p	407821	E3 ubiquitin-protein ligase ZNRF3 isoform 1 precursor [Mus musculus]
mmu-miR-146b-5p	384783	mCG17323, partial [Mus musculus]
mmu-miR-146b-5p	330133	-
mmu-miR-146b-5p	320150	PREDICTED: palmitoyltransferase ZDHHC17 [Aotus nancymaae]
mmu-miR-146b-5p	319626	-
mmu-miR-146b-5p	319482	Fc fragment of IgG binding protein-like precursor [Mus musculus]
mmu-miR-146b-5p	258832	olfactory receptor 109 [Mus musculus]
mmu-miR-146b-5p	244891	S phase cyclin A-associated protein in the endoplasmic reticulum [Mus musculus]
mmu-miR-146b-5p	244650	PH domain leucine-rich repeat-containing protein phosphatase 2 [Mus musculus]
mmu-miR-146b-5p	244562	multidrug resistance-associated protein 9 [Mus musculus]
mmu-miR-146b-5p	242721	kelch domain-containing protein 7A [Mus musculus]
mmu-miR-146b-5p	241589	UPF0606 protein KIAA1549L homolog [Mus musculus]
mmu-miR-146b-5p	241197	RecName: Full=Serpin B10
mmu-miR-146b-5p	241197	serine (or cysteine) peptidase inhibitor, clade B (ovalbumin), member 10, isoform CRA_b, partial [Mus musculus]
mmu-miR-146b-5p	240215	anion exchange protein 4 isoform 5 [Mus musculus]
mmu-miR-146b-5p	240066	zinc finger protein 870 [Mus musculus]
mmu-miR-146b-5p	239759	lipase, member H, isoform CRA_b, partial [Mus musculus]
mmu-miR-146b-5p	239759	lipase, member H, isoform CRA_d, partial [Mus musculus]
mmu-miR-146b-5p	239759	lipase, member H, isoform CRA_d, partial [Mus musculus]
mmu-miR-146b-5p	239759	lipase, member H, isoform CRA_d, partial [Mus musculus]
mmu-miR-146b-5p	237500	transmembrane and TPR repeat-containing protein 3 isoform 1 [Mus musculus]
mmu-miR-146b-5p	236643	synaptotagmin-like protein 5 isoform 1 [Mus musculus]
mmu-miR-146b-5p	236643	synaptotagmin-like 5, isoform CRA_b, partial [Mus musculus]
mmu-miR-146b-5p	235626	histone-lysine N-methyltransferase SETD2 [Mus musculus]
mmu-miR-146b-5p	233887	zinc finger protein 48 [Mus musculus]
mmu-miR-146b-5p	229574	filaggrin-2 [Mus musculus]
mmu-miR-146b-5p	228543	PREDICTED: rho-related GTP-binding protein RhoV isoform X1 [Mus musculus]
mmu-miR-146b-5p	224111	UBX domain-containing protein 7 [Mus musculus]
mmu-miR-146b-5p	213773	transducin (beta)-like 3, isoform CRA_b, partial [Mus musculus]
mmu-miR-146b-5p	208080	ubiquitin-associated protein 1-like [Mus musculus]
mmu-miR-146b-5p	207304	E3 ubiquitin-protein ligase HECTD1 [Mus musculus]
mmu-miR-146b-5p	117146	ubiquitin-protein ligase E3B [Mus musculus]
mmu-miR-146b-5p	114873	-
mmu-miR-146b-5p	104884	tyrosyl-DNA phosphodiesterase 1 [Mus musculus]
mmu-miR-146b-5p	104348	Zfp120 protein, partial [Mus musculus]
mmu-miR-146b-5p	104348	PREDICTED: zinc finger protein 120 isoform X2 [Rattus norvegicus]
mmu-miR-146b-5p	83924	integral membrane protein GPR137B [Mus musculus]
mmu-miR-146b-5p	78849	-
mmu-miR-146b-5p	77652	zinc finger protein 883A [Mus musculus]
mmu-miR-146b-5p	77097	protein TANC2 [Mus musculus]
mmu-miR-146b-5p	74735	-
mmu-miR-146b-5p	74153	ubiquitin-like modifier-activating enzyme 7 [Mus musculus]
mmu-miR-146b-5p	73884	-
mmu-miR-146b-5p	73826	mKIAA1649 protein [Mus musculus]
mmu-miR-146b-5p	72238	mKIAA0210 protein [Mus musculus]
mmu-miR-146b-5p	72157	phosphoglucomutase 2 [Mus musculus]
mmu-miR-146b-5p	71901	protein FAM219A isoform 2 [Mus musculus]
mmu-miR-146b-5p	71901	protein FAM219A isoform 1 [Mus musculus]
mmu-miR-146b-5p	71782	ankyrin repeat and LEM domain-containing protein 2 isoform 2 [Mus musculus]
mmu-miR-146b-5p	71782	ankyrin repeat and LEM domain-containing protein 2 isoform 1 [Mus musculus]
mmu-miR-146b-5p	70129	choline transporter-like protein 4 [Mus musculus]
mmu-miR-146b-5p	69030	mCG1047497 [Mus musculus]
mmu-miR-146b-5p	68986	mCG55467 [Mus musculus]
mmu-miR-146b-5p	68045	UPF0568 protein C14orf166 homolog [Mus musculus]
mmu-miR-146b-5p	67426	-
mmu-miR-146b-5p	66576	cytochrome b-c1 complex subunit 6, mitochondrial [Mus musculus]
mmu-miR-146b-5p	63830	-
mmu-miR-146b-5p	56809	glucocorticoid modulatory element binding protein 1, isoform CRA_b, partial [Mus musculus]
mmu-miR-146b-5p	56809	glucocorticoid modulatory element binding protein 1, isoform CRA_b, partial [Mus musculus]
mmu-miR-146b-5p	56494	golgi SNARE [Mus musculus]
mmu-miR-146b-5p	56386	beta-1,4-galactosyltransferase 6 [Mus musculus]
mmu-miR-146b-5p	54446	nuclear factor of activated T-cells 5 isoform a [Mus musculus]
mmu-miR-146b-5p	27406	ATP-binding cassette sub-family F member 3 [Mus musculus]
mmu-miR-146b-5p	22034	TNF receptor-associated factor 6 [Mus musculus]
mmu-miR-146b-5p	22034	TNF receptor-associated factor 6 [Mus musculus]
mmu-miR-146b-5p	21756	serine protease 40 precursor [Mus musculus]
mmu-miR-146b-5p	21755	inactive serine protease 39 precursor [Mus musculus]
mmu-miR-146b-5p	20818	signal recognition particle receptor subunit beta [Mus musculus]
mmu-miR-146b-5p	20741	spectrin beta chain, erythrocytic [Mus musculus]
mmu-miR-146b-5p	20264	-
mmu-miR-146b-5p	20264	-
mmu-miR-146b-5p	19888	oxygen-regulated protein 1 isoform 2 [Mus musculus]
mmu-miR-146b-5p	18600	protein-arginine deiminase type-2 [Mus musculus]
mmu-miR-146b-5p	18095	homeobox protein Nkx-3.1 [Mus musculus]
mmu-miR-146b-5p	16656	-
mmu-miR-146b-5p	16554	kinesin-like protein KIF13B [Mus musculus]
mmu-miR-146b-5p	15562	5-hydroxytryptamine receptor 4 [Mus musculus]
mmu-miR-146b-5p	14270	SLIT-ROBO Rho GTPase-activating protein 2 [Mus musculus]
mmu-miR-146b-5p	14230	peptidyl-prolyl cis-trans isomerase FKBP10 isoform 1 precursor [Mus musculus]
mmu-miR-146b-5p	14230	peptidyl-prolyl cis-trans isomerase FKBP10 isoform 2 precursor [Mus musculus]
mmu-miR-146b-5p	14161	-
mmu-miR-146b-5p	14161	-
mmu-miR-146b-5p	13800	NDPP-1 protein [Mus musculus]
mmu-miR-146b-5p	13800	NDPP-1 protein [Mus musculus]
mmu-miR-146b-5p	13800	NDPP-1 protein [Mus musculus]
mmu-miR-146b-5p	13800	NDPP-1 protein [Mus musculus]
mmu-miR-146b-5p	13527	dystrobrevin alpha, isoform CRA_b, partial [Mus musculus]
mmu-miR-146b-5p	13527	dystrobrevin alpha isoform a [Mus musculus]
mmu-miR-146b-5p	12638	cystic fibrosis transmembrane conductance regulator [Mus musculus]
mmu-miR-146b-5p	11907	arginyl-tRNA--protein transferase 1 isoform 1 [Mus musculus]
mmu-miR-146b-5p	11907	arginyl-tRNA--protein transferase 1 isoform 2 [Mus musculus]
mmu-miR-146b-5p	11907	arginyl-tRNA--protein transferase 1 isoform 4 [Mus musculus]
mmu-miR-146b-5p	11907	arginyl-tRNA--protein transferase 1 isoform 3 [Mus musculus]
mmu-miR-5121	102465177	-
mmu-miR-5121	100504464	-
mmu-miR-5121	100503068	PREDICTED: uncharacterized protein LOC101994174 [Microtus ochrogaster]
mmu-miR-5121	100503044	-
mmu-miR-5121	100042198	-
mmu-miR-5121	665934	mCG146113, partial [Mus musculus]
mmu-miR-5121	665005	ring finger protein (C3HC4 type) 19, isoform CRA_a [Mus musculus]
mmu-miR-5121	432562	mCG145518, partial [Mus musculus]
mmu-miR-5121	382450	-
mmu-miR-5121	382034	genetic suppressor element 1 isoform 2 [Mus musculus]
mmu-miR-5121	380705	transmembrane protein 102 [Mus musculus]
mmu-miR-5121	380684	neurofilament heavy polypeptide [Mus musculus]
mmu-miR-5121	378466	-
mmu-miR-5121	332396	Kcnk18 protein, partial [Mus musculus]
mmu-miR-5121	330958	-
mmu-miR-5121	330902	-
mmu-miR-5121	330599	-
mmu-miR-5121	329731	RIKEN cDNA 7530404M11, partial [Mus musculus]
mmu-miR-5121	329559	-
mmu-miR-5121	327762	-
mmu-miR-5121	320191	-
mmu-miR-5121	319955	DNA excision repair protein ERCC-6 [Mus musculus]
mmu-miR-5121	272031	mKIAA4247 protein [Mus musculus]
mmu-miR-5121	246738	-
mmu-miR-5121	246738	-
mmu-miR-5121	245902	coiled-coil domain-containing protein 15 [Mus musculus]
mmu-miR-5121	243197	major facilitator superfamily domain-containing protein 7 [Mus musculus]
mmu-miR-5121	240069	MORC family CW-type zinc finger protein 2B [Mus musculus]
mmu-miR-5121	238330	mKIAA1865 protein [Mus musculus]
mmu-miR-5121	234593	protein NDRG4 isoform B [Mus musculus]
mmu-miR-5121	231637	protein phosphatase Slingshot homolog 1 [Mus musculus]
mmu-miR-5121	231070	insulin-induced gene 1 protein [Mus musculus]
mmu-miR-5121	229474	mKIAA1727 protein [Mus musculus]
mmu-miR-5121	229474	mKIAA1727 protein [Mus musculus]
mmu-miR-5121	229004	glucocorticoid modulatory element-binding protein 2 [Mus musculus]
mmu-miR-5121	228869	nuclear receptor coactivator 5 [Mus musculus]
mmu-miR-5121	228413	transmembrane gamma-carboxyglutamic acid protein 4 precursor [Mus musculus]
mmu-miR-5121	226778	-
mmu-miR-5121	226548	-
mmu-miR-5121	217371	ras-related protein Rab-40B [Mus musculus]
mmu-miR-5121	216961	coronin-6 isoform B [Mus musculus]
mmu-miR-5121	216961	coronin-6 isoform C [Mus musculus]
mmu-miR-5121	215201	tRNA (uracil(54)-C(5))-methyltransferase homolog isoform a [Mus musculus]
mmu-miR-5121	215201	tRNA (uracil(54)-C(5))-methyltransferase homolog isoform a [Mus musculus]
mmu-miR-5121	214791	SERTA domain containing 4, isoform CRA_a, partial [Mus musculus]
mmu-miR-5121	212167	RIKEN cDNA A530088I07, isoform CRA_b, partial [Mus musculus]
mmu-miR-5121	208727	-
mmu-miR-5121	192166	sarcosine dehydrogenase, mitochondrial [Mus musculus]
mmu-miR-5121	109361	unnamed protein product [Mus musculus]
mmu-miR-5121	109294	-
mmu-miR-5121	109294	-
mmu-miR-5121	106757	cation channel sperm-associated protein subunit delta precursor [Mus musculus]
mmu-miR-5121	106143	PREDICTED: LOW QUALITY PROTEIN: CGG triplet repeat-binding protein 1 [Odobenus rosmarus divergens]
mmu-miR-5121	100019	midasin [Mus musculus]
mmu-miR-5121	94229	sodium-driven chloride bicarbonate exchanger isoform 3 [Mus musculus]
mmu-miR-5121	94071	C-type lectin domain family 2 member H [Mus musculus]
mmu-miR-5121	83679	-
mmu-miR-5121	78449	-
mmu-miR-5121	77171	-
mmu-miR-5121	76676	-
mmu-miR-5121	75813	-
mmu-miR-5121	75782	RIKEN cDNA 4930431B11, isoform CRA_b, partial [Mus musculus]
mmu-miR-5121	75245	-
mmu-miR-5121	72224	ring finger protein (C3HC4 type) 19, isoform CRA_a [Mus musculus]
mmu-miR-5121	71742	serine/threonine-protein kinase ULK3 [Mus musculus]
mmu-miR-5121	71682	WD repeat-containing protein 27 [Mus musculus]
mmu-miR-5121	70933	mCG146020, partial [Mus musculus]
mmu-miR-5121	70011	-
mmu-miR-5121	69743	-
mmu-miR-5121	69443	-
mmu-miR-5121	68671	ethanolamine-phosphate cytidylyltransferase [Mus musculus]
mmu-miR-5121	68606	protein phosphatase 1F [Mus musculus]
mmu-miR-5121	68316	-
mmu-miR-5121	67542	conserved oligomeric Golgi complex subunit 6 [Mus musculus]
mmu-miR-5121	66970	PREDICTED: single-stranded DNA-binding protein 2-like isoform X1 [Mustela putorius furo]
mmu-miR-5121	66970	PREDICTED: single-stranded DNA-binding protein 2-like isoform X2 [Mustela putorius furo]
mmu-miR-5121	66583	PREDICTED: exosome complex component CSL4 isoform X1 [Bison bison bison]
mmu-miR-5121	63830	-
mmu-miR-5121	58799	-
mmu-miR-5121	56784	ral GTPase-activating protein subunit alpha-1 isoform 2 [Mus musculus]
mmu-miR-5121	56220	mKIAA4205 protein [Mus musculus]
mmu-miR-5121	29875	mKIAA0051 protein [Mus musculus]
mmu-miR-5121	22288	utrophin [Mus musculus]
mmu-miR-5121	20759	Sprr2e protein, partial [Mus musculus]
mmu-miR-5121	19878	rho-associated protein kinase 2 [Mus musculus]
mmu-miR-5121	19696	proto-oncogene c-Rel [Mus musculus]
mmu-miR-5121	19672	reticulocalbin-1 precursor [Mus musculus]
mmu-miR-5121	19276	receptor-type tyrosine-protein phosphatase N2 precursor [Mus musculus]
mmu-miR-5121	17345	antigen KI-67 [Mus musculus]
mmu-miR-5121	17245	nuclear protein MDM1 isoform 2 [Mus musculus]
mmu-miR-5121	17245	nuclear protein MDM1 isoform 1 [Mus musculus]
mmu-miR-5121	17245	nuclear protein MDM1 isoform 4 [Mus musculus]
mmu-miR-5121	17245	nuclear protein MDM1 isoform 3 [Mus musculus]
mmu-miR-5121	16516	ATP-sensitive inward rectifier potassium channel 15 isoform a [Mus musculus]
mmu-miR-5121	16010	insulin-like growth factor-binding protein 4 precursor [Mus musculus]
mmu-miR-5121	15492	unnamed protein product [Mus musculus]
mmu-miR-5121	13982	C-terminally truncated estrogen receptor alpha product-2a [Mus musculus]
mmu-miR-5121	13435	DNA methyltransferase 3A [Mus musculus]
mmu-miR-5121	12406	PREDICTED: serpin H1 isoform X1 [Chlorocebus sabaeus]
mmu-miR-5121	11307	-
mmu-miR-376a-3p	100503184	mCG1046406, partial [Mus musculus]
mmu-miR-376a-3p	100040732	germ cell-less homolog 1 family member [Mus musculus]
mmu-miR-376a-3p	622474	sperm motility kinase 3 [Mus musculus]
mmu-miR-376a-3p	619301	transmembrane protein 253 [Mus musculus]
mmu-miR-376a-3p	403088	-
mmu-miR-376a-3p	381605	TBC1 domain family member 2A [Mus musculus]
mmu-miR-376a-3p	381538	maestro heat-like repeat-containing protein family member 7 [Mus musculus]
mmu-miR-376a-3p	380840	cDNA sequence BC034664, partial [Mus musculus]
mmu-miR-376a-3p	353172	glycyl-tRNA synthetase, isoform CRA_b, partial [Mus musculus]
mmu-miR-376a-3p	330485	transmembrane protein 145, isoform CRA_b, partial [Mus musculus]
mmu-miR-376a-3p	330474	PREDICTED: zinc finger CCCH domain-containing protein 4 isoform X4 [Mus musculus]
mmu-miR-376a-3p	329152	E3 ubiquitin-protein ligase HECW2 isoform 1 [Mus musculus]
mmu-miR-376a-3p	328778	ras-related protein Rab-26 [Mus musculus]
mmu-miR-376a-3p	328250	NUT family member 2 [Mus musculus]
mmu-miR-376a-3p	319800	integral membrane transport protein UST1R [Mus musculus]
mmu-miR-376a-3p	258759	olfactory receptor 1408 [Mus musculus]
mmu-miR-376a-3p	245282	apolipoprotein L 10a [Mus musculus]
mmu-miR-376a-3p	238663	putative spermatogenesis-associated protein 31D3 [Mus musculus]
mmu-miR-376a-3p	237979	protein sidekick-2 precursor [Mus musculus]
mmu-miR-376a-3p	235344	serine/threonine-protein kinase SIK2 [Mus musculus]
mmu-miR-376a-3p	235028	zinc finger protein 426, isoform CRA_d [Mus musculus]
mmu-miR-376a-3p	233893	zinc finger protein 764 isoform 1 [Mus musculus]
mmu-miR-376a-3p	233103	uncharacterized protein KIAA0355 homolog [Mus musculus]
mmu-miR-376a-3p	230868	immunoglobulin superfamily member 21 precursor [Mus musculus]
mmu-miR-376a-3p	230576	tetratricopeptide repeat protein 22 [Mus musculus]
mmu-miR-376a-3p	227700	endophilin-B2 isoform 3 [Mus musculus]
mmu-miR-376a-3p	225341	-
mmu-miR-376a-3p	216877	DEAH (Asp-Glu-Ala-His) box polypeptide 33 [Mus musculus]
mmu-miR-376a-3p	216835	ubiquitin carboxyl-terminal hydrolase 43 isoform 1 [Mus musculus]
mmu-miR-376a-3p	211383	APC membrane recruitment protein 3 [Mus musculus]
mmu-miR-376a-3p	209776	probable G-protein coupled receptor 139 [Mus musculus]
mmu-miR-376a-3p	209387	tripartite motif-containing 79 isoform 1 [Mus musculus]
mmu-miR-376a-3p	208266	DOT1-like, histone H3 methyltransferase (S. cerevisiae), isoform CRA_c, partial [Mus musculus]
mmu-miR-376a-3p	170947	myozenin-3 [Mus musculus]
mmu-miR-376a-3p	170441	-
mmu-miR-376a-3p	109151	-
mmu-miR-376a-3p	108954	protein phosphatase 1 regulatory subunit 15B [Mus musculus]
mmu-miR-376a-3p	108116	solute carrier organic anion transporter family member 3A1 isoform 1 [Mus musculus]
mmu-miR-376a-3p	103537	mCG1463, isoform CRA_b, partial [Mus musculus]
mmu-miR-376a-3p	100604	volume-regulated anion channel subunit LRRC8C [Mus musculus]
mmu-miR-376a-3p	98314	PREDICTED: D-2-hydroxyglutarate dehydrogenase, mitochondrial isoform X1 [Mus musculus]
mmu-miR-376a-3p	96935	sushi domain containing 4, isoform CRA_a, partial [Mus musculus]
mmu-miR-376a-3p	94045	P2X purinoceptor 5 [Mus musculus]
mmu-miR-376a-3p	78789	Vsig1 protein [Mus musculus]
mmu-miR-376a-3p	78558	serine protease HTRA3 isoform a precursor [Mus musculus]
mmu-miR-376a-3p	78334	mKIAA1028 protein [Mus musculus]
mmu-miR-376a-3p	74762	MAM domain-containing glycosylphosphatidylinositol anchor protein 1 precursor [Mus musculus]
mmu-miR-376a-3p	74476	unnamed protein product [Mus musculus]
mmu-miR-376a-3p	74363	mCG1037092, partial [Mus musculus]
mmu-miR-376a-3p	74080	-
mmu-miR-376a-3p	74034	-
mmu-miR-376a-3p	73389	high mobility group box transcription factor 1, isoform CRA_b, partial [Mus musculus]
mmu-miR-376a-3p	73338	mCG51762 [Mus musculus]
mmu-miR-376a-3p	73250	carcinoembryonic antigen-related cell adhesion molecule 5 precursor [Mus musculus]
mmu-miR-376a-3p	72960	DNA topoisomerase I, mitochondrial [Mus musculus]
mmu-miR-376a-3p	72446	PREDICTED: proline-rich protein 5-like isoform X2 [Mus musculus]
mmu-miR-376a-3p	72333	palladin isoform 4 [Mus musculus]
mmu-miR-376a-3p	72297	N-acetyllactosaminide beta-1,3-N-acetylglucosaminyltransferase 3 precursor [Mus musculus]
mmu-miR-376a-3p	70882	armadillo repeat-containing protein 3 isoform 4 [Mus musculus]
mmu-miR-376a-3p	70122	protein AF-9 isoform 1 [Mus musculus]
mmu-miR-376a-3p	69710	PREDICTED: arf-GAP with Rho-GAP domain, ANK repeat and PH domain-containing protein 1 isoform X6 [Mus musculus]
mmu-miR-376a-3p	63873	transient receptor potential cation channel subfamily V member 4 [Mus musculus]
mmu-miR-376a-3p	59030	McKusick-Kaufman syndrome protein [Mus musculus]
mmu-miR-376a-3p	56527	microtubule-associated serine/threonine-protein kinase 1 [Mus musculus]
mmu-miR-376a-3p	56430	mKIAA4046 protein [Mus musculus]
mmu-miR-376a-3p	56401	prolyl 3-hydroxylase 1 isoform 2 precursor [Mus musculus]
mmu-miR-376a-3p	54004	protein diaphanous homolog 2 [Mus musculus]
mmu-miR-376a-3p	50776	DNA polymerase subunit gamma-2, mitochondrial [Mus musculus]
mmu-miR-376a-3p	50769	PREDICTED: phospholipid-transporting ATPase IB isoform X2 [Mus musculus]
mmu-miR-376a-3p	30945	E3 ubiquitin-protein ligase RNF19A [Mus musculus]
mmu-miR-376a-3p	30936	thymic stromal cotransporter protein [Mus musculus]
mmu-miR-376a-3p	27029	N-sulfoglucosamine sulfohydrolase (sulfamidase), isoform CRA_d, partial [Mus musculus]
mmu-miR-376a-3p	24131	PREDICTED: LIM domain-binding protein 3 isoform X2 [Rattus norvegicus]
mmu-miR-376a-3p	22688	zinc finger protein 26 [Mus musculus]
mmu-miR-376a-3p	22227	mitochondrial brown fat uncoupling protein 1 [Mus musculus]
mmu-miR-376a-3p	21337	substance-K receptor [Mus musculus]
mmu-miR-376a-3p	20963	tyrosine-protein kinase SYK [Mus musculus]
mmu-miR-376a-3p	20689	sal-like protein 3 [Mus musculus]
mmu-miR-376a-3p	20512	excitatory amino acid transporter 1 [Mus musculus]
mmu-miR-376a-3p	19674	recoverin [Mus musculus]
mmu-miR-376a-3p	19415	-
mmu-miR-376a-3p	18703	polymeric immunoglobulin receptor precursor [Mus musculus]
mmu-miR-376a-3p	18563	pyruvate carboxylase, mitochondrial isoform 1 [Mus musculus]
mmu-miR-376a-3p	18521	poly(rC)-binding protein 2 isoform b [Homo sapiens]
mmu-miR-376a-3p	18508	paired box gene 6, isoform CRA_a [Rattus norvegicus]
mmu-miR-376a-3p	18018	nuclear factor of activated T-cells, cytoplasmic 1 isoform 5 [Mus musculus]
mmu-miR-376a-3p	17079	CD180 antigen precursor [Mus musculus]
mmu-miR-376a-3p	16526	PREDICTED: potassium channel subfamily K member 2 isoform X2 [Mus musculus]
mmu-miR-376a-3p	16526	potassium channel subfamily K member 2 isoform 3 [Mus musculus]
mmu-miR-376a-3p	16324	inhibin beta B chain precursor [Mus musculus]
mmu-miR-376a-3p	14581	zinc finger protein Gfi-1 isoform 2 [Mus musculus]
mmu-miR-376a-3p	14345	-
mmu-miR-376a-3p	13982	rCG41136, isoform CRA_b [Rattus norvegicus]
mmu-miR-376a-3p	13518	dystonin isoform 2 [Mus musculus]
mmu-miR-376a-3p	13409	transmembrane channel-like protein 1 [Mus musculus]
mmu-miR-376a-3p	13078	cytochrome P450 1B1 [Mus musculus]
mmu-miR-376a-3p	12523	SLAM family member 5 isoform 3 precursor [Mus musculus]
mmu-miR-376a-3p	12453	cyclin I, isoform CRA_a, partial [Mus musculus]
mmu-miR-376a-3p	11921	-
mmu-miR-376a-3p	11517	pituitary adenylate cyclase-activating polypeptide type I receptor isoform 2 precursor [Mus musculus]
mmu-miR-494-3p	100503265	mCG144557, partial [Mus musculus]
mmu-miR-494-3p	100384890	mCG145515, partial [Mus musculus]
mmu-miR-494-3p	100126773	exocrine gland-secreting peptide 34 precursor [Mus musculus]
mmu-miR-494-3p	100043462	PREDICTED: nuclear transport factor 2-like [Balaenoptera acutorostrata scammoni]
mmu-miR-494-3p	100038690	-
mmu-miR-494-3p	100038358	E3 ubiquitin-protein ligase TRAIP [Mus musculus]
mmu-miR-494-3p	100038353	-
mmu-miR-494-3p	768252	-
mmu-miR-494-3p	619327	unnamed protein product [Mus musculus]
mmu-miR-494-3p	432593	mCG147538 [Mus musculus]
mmu-miR-494-3p	404239	mas-related G-protein coupled receptor member B5 [Mus musculus]
mmu-miR-494-3p	321015	-
mmu-miR-494-3p	320772	unnamed protein product [Mus musculus]
mmu-miR-494-3p	320560	DENN domain-containing protein 5B [Mus musculus]
mmu-miR-494-3p	319930	carcinoembryonic antigen-related cell adhesion molecule 19 precursor [Mus musculus]
mmu-miR-494-3p	269180	type I inositol 3,4-bisphosphate 4-phosphatase isoform 2 [Mus musculus]
mmu-miR-494-3p	246102	rotatin [Mus musculus]
mmu-miR-494-3p	243621	IQ motif and SEC7 domain-containing protein 3 isoform 1 [Mus musculus]
mmu-miR-494-3p	238988	ERC protein 2 [Mus musculus]
mmu-miR-494-3p	238568	serine (or cysteine) peptidase inhibitor, clade B, member 6d [Mus musculus]
mmu-miR-494-3p	237860	protein phosphatase Slingshot homolog 2 isoform 1 [Mus musculus]
mmu-miR-494-3p	233246	-
mmu-miR-494-3p	231386	YTH domain-containing protein 1 [Mus musculus]
mmu-miR-494-3p	230866	C230096C10Rik protein [Mus musculus]
mmu-miR-494-3p	228545	vacuolar protein sorting-associated protein 18 homolog [Mus musculus]
mmu-miR-494-3p	226830	N-lysine methyltransferase SMYD2 [Mus musculus]
mmu-miR-494-3p	226105	cytochrome P450, family 2, subfamily c, polypeptide 70, isoform CRA_b, partial [Mus musculus]
mmu-miR-494-3p	223828	-
mmu-miR-494-3p	223527	mCG145920, isoform CRA_b, partial [Mus musculus]
mmu-miR-494-3p	216825	mKIAA1063 protein [Mus musculus]
mmu-miR-494-3p	216190	DCC-interacting protein 13-beta [Mus musculus]
mmu-miR-494-3p	210998	-
mmu-miR-494-3p	210510	tudor domain-containing protein 6 isoform 2 [Mus musculus]
mmu-miR-494-3p	209224	cytosolic ovarian carcinoma antigen 1, isoform CRA_c, partial [Mus musculus]
mmu-miR-494-3p	171486	CD99 antigen-like protein 2 isoform 2 precursor [Mus musculus]
mmu-miR-494-3p	171168	N-acylsphingosine amidohydrolase (alkaline ceramidase) 3, partial [Mus musculus]
mmu-miR-494-3p	116733	Vacuolar protein sorting-associated protein 4A [Fukomys damarensis]
mmu-miR-494-3p	111975	mCG146197, partial [Mus musculus]
mmu-miR-494-3p	110886	gamma-aminobutyric acid receptor subunit alpha-5 precursor [Mus musculus]
mmu-miR-494-3p	109676	-
mmu-miR-494-3p	108800	stonin 2, isoform CRA_a, partial [Mus musculus]
mmu-miR-494-3p	103268	RIKEN cDNA 2410017P07, isoform CRA_b, partial [Mus musculus]
mmu-miR-494-3p	97848	serine proteinase inhibitor member 6C [Mus musculus]
mmu-miR-494-3p	77771	-
mmu-miR-494-3p	77531	ankyrin repeat and sterile alpha motif domain-containing protein 1B isoform 2 [Mus musculus]
mmu-miR-494-3p	77519	zinc finger protein 426-like [Mus musculus]
mmu-miR-494-3p	77113	kelch-like protein 2 [Mus musculus]
mmu-miR-494-3p	76510	trafficking protein particle complex subunit 9 isoform 5 [Mus musculus]
mmu-miR-494-3p	76007	zinc finger, MYM-type 2, isoform CRA_b, partial [Mus musculus]
mmu-miR-494-3p	75504	uncharacterized protein C1orf194 homolog [Mus musculus]
mmu-miR-494-3p	73144	-
mmu-miR-494-3p	72568	protein lin-9 homolog [Mus musculus]
mmu-miR-494-3p	72303	cytochrome P450, family 2, subfamily c, polypeptide 65 precursor [Mus musculus]
mmu-miR-494-3p	72205	echinoderm microtubule-associated protein-like 2 isoform 1 [Mus musculus]
mmu-miR-494-3p	71756	carboxypeptidase N, polypeptide 2, partial [Mus musculus]
mmu-miR-494-3p	71244	mCG13839, partial [Mus musculus]
mmu-miR-494-3p	71227	PREDICTED: dynein assembly factor with WDR repeat domains 1 isoform X1 [Mus musculus]
mmu-miR-494-3p	70551	transmembrane and tetratricopeptide repeat containing 4, isoform CRA_c, partial [Mus musculus]
mmu-miR-494-3p	70470	-
mmu-miR-494-3p	69894	PREDICTED: uncharacterized protein C10orf35 homolog isoform X1 [Cavia porcellus]
mmu-miR-494-3p	69543	calpain small subunit 2 [Mus musculus]
mmu-miR-494-3p	69274	CTD (carboxy-terminal domain, RNA polymerase II, polypeptide A) small phosphatase-like, partial [Mus musculus]
mmu-miR-494-3p	69106	stomatin-like 1 [Mus musculus]
mmu-miR-494-3p	68729	-
mmu-miR-494-3p	68344	transmembrane protein 174 [Mus musculus]
mmu-miR-494-3p	68203	GTP-binding protein Di-Ras2 [Mus musculus]
mmu-miR-494-3p	68144	mCG1045525, partial [Mus musculus]
mmu-miR-494-3p	66999	-
mmu-miR-494-3p	57385	P2Y purinoceptor 4 [Mus musculus]
mmu-miR-494-3p	56087	dynein heavy chain 10, axonemal [Mus musculus]
mmu-miR-494-3p	55990	dimethylaniline monooxygenase [N-oxide-forming] 2 [Mus musculus]
mmu-miR-494-3p	53332	myotubularin-related protein 1 isoform A [Mus musculus]
mmu-miR-494-3p	52401	-
mmu-miR-494-3p	28250	solute carrier organic anion transporter family member 1A4 [Mus musculus]
mmu-miR-494-3p	27762	von Willebrand factor A domain-containing protein 7 precursor [Mus musculus]
mmu-miR-494-3p	26936	myosin phosphatase Rho-interacting protein isoform 1 [Mus musculus]
mmu-miR-494-3p	22715	zinc finger protein 57 isoform 1 [Mus musculus]
mmu-miR-494-3p	22324	proto-oncogene vav isoform 2 [Mus musculus]
mmu-miR-494-3p	22061	PREDICTED: tumor protein 63 isoform X3 [Papio anubis]
mmu-miR-494-3p	21822	T-cell specific GTPase, isoform CRA_a, partial [Mus musculus]
mmu-miR-494-3p	21345	transgelin [Mus musculus]
mmu-miR-494-3p	20254	secretogranin-2 isoform 2 precursor [Mus musculus]
mmu-miR-494-3p	18749	cAMP-dependent protein kinase catalytic subunit beta isoform 2 [Mus musculus]
mmu-miR-494-3p	17975	unnamed protein product [Mus musculus]
mmu-miR-494-3p	17153	myelin and lymphocyte protein isoform 1 [Mus musculus]
mmu-miR-494-3p	16589	PREDICTED: serine/threonine-protein kinase Kist [Tarsius syrichta]
mmu-miR-494-3p	16560	kinesin-like protein KIF1A isoform b [Mus musculus]
mmu-miR-494-3p	16475	LIM domain-containing protein ajuba [Mus musculus]
mmu-miR-494-3p	15437	homeobox protein Hox-D8 isoform a [Mus musculus]
mmu-miR-494-3p	14378	-
mmu-miR-494-3p	14119	fibrillin-2 precursor [Mus musculus]
mmu-miR-494-3p	14089	prolyl endopeptidase FAP [Mus musculus]
mmu-miR-494-3p	13046	PREDICTED: CUGBP Elav-like family member 1 isoform X2 [Peromyscus maniculatus bairdii]
mmu-miR-494-3p	12929	-
mmu-miR-494-3p	12394	runt-related transcription factor 1 isoform 2 [Mus musculus]
mmu-miR-494-3p	12322	calcium/calmodulin-dependent protein kinase type II subunit alpha isoform 3 precursor [Mus musculus]
mmu-miR-494-3p	12167	bone morphogenetic protein receptor type-1B [Cricetulus griseus]
mmu-miR-494-3p	12064	brain-derived neurotrophic factor isoform 1 precursor [Mus musculus]
mmu-miR-494-3p	11798	PREDICTED: E3 ubiquitin-protein ligase XIAP isoform X2 [Mus musculus]
mmu-miR-494-3p	11438	-
mmu-miR-125b-1-3p	100504112	-
mmu-miR-125b-1-3p	100503036	coiled-coil domain-containing protein 179 [Mus musculus]
mmu-miR-125b-1-3p	100303738	latent transforming growth factor beta binding protein 2, isoform CRA_b [Mus musculus]
mmu-miR-125b-1-3p	622124	mCG148192 [Mus musculus]
mmu-miR-125b-1-3p	620419	zinc finger protein 669-like [Mus musculus]
mmu-miR-125b-1-3p	399609	VPS10 domain-containing receptor SorCS1 isoform 2 precursor [Mus musculus]
mmu-miR-125b-1-3p	381485	-
mmu-miR-125b-1-3p	381022	histone-lysine N-methyltransferase 2D [Mus musculus]
mmu-miR-125b-1-3p	353326	retrotransposon-like protein 1 [Mus musculus]
mmu-miR-125b-1-3p	332221	zinc finger and SCAN domain-containing protein 10 isoform 2 [Mus musculus]
mmu-miR-125b-1-3p	332221	zinc finger and SCAN domain-containing protein 10 isoform 1 [Mus musculus]
mmu-miR-125b-1-3p	331529	mCG114172, isoform CRA_a, partial [Mus musculus]
mmu-miR-125b-1-3p	330830	-
mmu-miR-125b-1-3p	320301	rCG62930 [Rattus norvegicus]
mmu-miR-125b-1-3p	319468	-
mmu-miR-125b-1-3p	269702	M-phase phosphoprotein 9 isoform a [Mus musculus]
mmu-miR-125b-1-3p	269037	CBP80/20-dependent translation initiation factor [Mus musculus]
mmu-miR-125b-1-3p	258565	olfactory receptor 1009 [Mus musculus]
mmu-miR-125b-1-3p	246229	PREDICTED: basic immunoglobulin-like variable motif-containing protein isoform X2 [Mus musculus]
mmu-miR-125b-1-3p	242602	uncharacterized protein C1orf177 homolog [Mus musculus]
mmu-miR-125b-1-3p	240168	mKIAA0846 protein [Mus musculus]
mmu-miR-125b-1-3p	240168	mKIAA0846 protein [Mus musculus]
mmu-miR-125b-1-3p	239650	coiled-coil domain-containing protein 184 [Mus musculus]
mmu-miR-125b-1-3p	239167	RIKEN cDNA D930020E02, partial [Mus musculus]
mmu-miR-125b-1-3p	234094	PREDICTED: rho guanine nucleotide exchange factor 10 isoform X2 [Mus musculus]
mmu-miR-125b-1-3p	229681	PREDICTED: suppressor of tumorigenicity 7 protein-like isoform X2 [Microtus ochrogaster]
mmu-miR-125b-1-3p	229007	zinc finger, CCCH-type with G patch domain, isoform CRA_a, partial [Mus musculus]
mmu-miR-125b-1-3p	229007	zinc finger, CCCH-type with G patch domain, isoform CRA_a, partial [Mus musculus]
mmu-miR-125b-1-3p	218210	-
mmu-miR-125b-1-3p	213989	transmembrane protein 82 [Mus musculus]
mmu-miR-125b-1-3p	213819	CAS1 domain-containing protein 1 precursor [Mus musculus]
mmu-miR-125b-1-3p	208228	MOB kinase activator 3A [Mus musculus]
mmu-miR-125b-1-3p	170768	mCG9572, isoform CRA_a, partial [Mus musculus]
mmu-miR-125b-1-3p	109079	selenophosphate synthetase 1, isoform CRA_b, partial [Mus musculus]
mmu-miR-125b-1-3p	108800	stonin 2, isoform CRA_a, partial [Mus musculus]
mmu-miR-125b-1-3p	108657	arginyl aminopeptidase-like 1 [Mus musculus]
mmu-miR-125b-1-3p	106722	protein G6b isoform 1 precursor [Mus musculus]
mmu-miR-125b-1-3p	106722	protein G6b isoform 2 precursor [Mus musculus]
mmu-miR-125b-1-3p	105727	solute carrier family 38, member 1, isoform CRA_a, partial [Mus musculus]
mmu-miR-125b-1-3p	102132	-
mmu-miR-125b-1-3p	102115	unnamed protein product [Mus musculus]
mmu-miR-125b-1-3p	99003	PREDICTED: glutamine and serine-rich protein 1 isoform X1 [Mus musculus]
mmu-miR-125b-1-3p	98970	fibrinogen C domain-containing protein 1 [Mus musculus]
mmu-miR-125b-1-3p	93706	protocadherin gamma subfamily C, 3 precursor [Mus musculus]
mmu-miR-125b-1-3p	78266	zinc finger protein 687 [Mus musculus]
mmu-miR-125b-1-3p	77609	-
mmu-miR-125b-1-3p	77609	-
mmu-miR-125b-1-3p	75552	progestin and adipoQ receptor family member 9 [Mus musculus]
mmu-miR-125b-1-3p	75216	centrosomal protein of 128 kDa [Mus musculus]
mmu-miR-125b-1-3p	74352	zinc finger protein 84 [Mus musculus]
mmu-miR-125b-1-3p	73166	delta(14)-sterol reductase [Mus musculus]
mmu-miR-125b-1-3p	72289	hypothetical protein [Plasmodium berghei strain ANKA], partial [Plasmodium berghei ANKA]
mmu-miR-125b-1-3p	72046	up-regulator of cell proliferation isoform 1 [Mus musculus]
mmu-miR-125b-1-3p	69834	RIKEN cDNA 1810048P08, isoform CRA_a, partial [Mus musculus]
mmu-miR-125b-1-3p	69834	ras-related protein Rab-43 isoform a [Mus musculus]
mmu-miR-125b-1-3p	69834	ras-related protein Rab-43 isoform b [Mus musculus]
mmu-miR-125b-1-3p	69159	GTPase RhebL1 precursor [Mus musculus]
mmu-miR-125b-1-3p	68625	cilia- and flagella-associated protein 57 [Mus musculus]
mmu-miR-125b-1-3p	68040	mCG146030, isoform CRA_b, partial [Mus musculus]
mmu-miR-125b-1-3p	67588	PREDICTED: E3 ubiquitin-protein ligase NRDP1 isoform X2 [Nomascus leucogenys]
mmu-miR-125b-1-3p	67261	mCG142216 [Mus musculus]
mmu-miR-125b-1-3p	66784	Ig-like V-type domain-containing protein FAM187A precursor [Mus musculus]
mmu-miR-125b-1-3p	59026	E3 ubiquitin-protein ligase HUWE1 [Mus musculus]
mmu-miR-125b-1-3p	56533	regulator of G-protein signaling 17 isoform 1 [Mus musculus]
mmu-miR-125b-1-3p	56533	regulator of G-protein signaling 17 isoform 1 [Mus musculus]
mmu-miR-125b-1-3p	54725	-
mmu-miR-125b-1-3p	54725	cell adhesion molecule 1 isoform a precursor [Mus musculus]
mmu-miR-125b-1-3p	54725	-
mmu-miR-125b-1-3p	54725	cell adhesion molecule 1 isoform e precursor [Mus musculus]
mmu-miR-125b-1-3p	54725	-
mmu-miR-125b-1-3p	54376	voltage-dependent calcium channel gamma-3 subunit [Rattus norvegicus]
mmu-miR-125b-1-3p	52864	-
mmu-miR-125b-1-3p	50798	PREDICTED: bifunctional UDP-N-acetylglucosamine 2-epimerase/N-acetylmannosamine kinase isoform X1 [Mus musculus]
mmu-miR-125b-1-3p	27387	SH2 domain containing 3C, isoform CRA_a, partial [Mus musculus]
mmu-miR-125b-1-3p	27267	cysteine--tRNA ligase, cytoplasmic isoform 1 [Mus musculus]
mmu-miR-125b-1-3p	27267	cysteine--tRNA ligase, cytoplasmic isoform 2 [Mus musculus]
mmu-miR-125b-1-3p	26561	matrix metalloproteinase-23 isoform 1 precursor [Mus musculus]
mmu-miR-125b-1-3p	26561	matrix metalloproteinase-23 isoform 2 [Mus musculus]
mmu-miR-125b-1-3p	24057	SH3 domain-containing YSC84-like protein 1 isoform 1 [Mus musculus]
mmu-miR-125b-1-3p	22033	TNF receptor-associated factor 5 [Mus musculus]
mmu-miR-125b-1-3p	20410	vinexin isoform a [Mus musculus]
mmu-miR-125b-1-3p	20360	sema domain, transmembrane domain (TM), and cytoplasmic domain, (semaphorin) 6C, isoform CRA_d, partial [Mus musculus]
mmu-miR-125b-1-3p	20360	sema domain, transmembrane domain (TM), and cytoplasmic domain, (semaphorin) 6C, isoform CRA_d, partial [Mus musculus]
mmu-miR-125b-1-3p	20360	sema domain, transmembrane domain (TM), and cytoplasmic domain, (semaphorin) 6C, isoform CRA_d, partial [Mus musculus]
mmu-miR-125b-1-3p	20360	sema domain, transmembrane domain (TM), and cytoplasmic domain, (semaphorin) 6C, isoform CRA_c, partial [Mus musculus]
mmu-miR-125b-1-3p	20148	short-chain dehydrogenase/reductase 3 isoform 1 [Mus musculus]
mmu-miR-125b-1-3p	19647	retinoblastoma binding protein 6, isoform CRA_f [Mus musculus]
mmu-miR-125b-1-3p	19377	retinoic acid-induced protein 1 [Mus musculus]
mmu-miR-125b-1-3p	19377	retinoic acid-induced protein 1 [Mus musculus]
mmu-miR-125b-1-3p	19054	mCG8010, isoform CRA_b, partial [Mus musculus]
mmu-miR-125b-1-3p	18826	PREDICTED: plastin-2 isoform X1 [Panthera tigris altaica]
mmu-miR-125b-1-3p	18826	-
mmu-miR-125b-1-3p	16570	-
mmu-miR-125b-1-3p	12831	procollagen, type V, alpha 1 [Mus musculus]
mmu-miR-125b-1-3p	12550	-
mmu-miR-125b-1-3p	12291	voltage-dependent T-type calcium channel subunit alpha-1G isoform a [Mus musculus]
mmu-miR-125b-1-3p	12291	voltage-dependent T-type calcium channel subunit alpha-1G isoform d [Mus musculus]
mmu-miR-125b-1-3p	12291	voltage-dependent T-type calcium channel subunit alpha-1G isoform c [Mus musculus]
mmu-miR-125b-1-3p	12291	voltage-dependent T-type calcium channel subunit alpha-1G isoform b [Mus musculus]
mmu-miR-125b-1-3p	12091	beta-galactosidase preproprotein [Mus musculus]
mmu-miR-34c-3p	100504265	-
mmu-miR-34c-3p	100038479	-
mmu-miR-34c-3p	723902	-
mmu-miR-34c-3p	666938	BEN domain-containing protein 4 [Mus musculus]
mmu-miR-34c-3p	620709	epididymal-specific lipocalin-6 isoform 1 precursor [Mus musculus]
mmu-miR-34c-3p	384569	neuro-oncological ventral antigen 2 [Homo sapiens]
mmu-miR-34c-3p	381598	cadherin 11 [Mus musculus]
mmu-miR-34c-3p	272551	DNA replication complex GINS protein PSF2 [Mus musculus]
mmu-miR-34c-3p	268470	-
mmu-miR-34c-3p	258363	olfactory receptor 1093 [Mus musculus]
mmu-miR-34c-3p	243371	-
mmu-miR-34c-3p	243369	SCO-spondin precursor [Mus musculus]
mmu-miR-34c-3p	236899	choline-phosphate cytidylyltransferase B isoform 1 [Mus musculus]
mmu-miR-34c-3p	230099	carbonic anhydrase 9 precursor [Mus musculus]
mmu-miR-34c-3p	229862	hypothetical protein 9230109N16, partial [Mus musculus]
mmu-miR-34c-3p	227399	mKIAA0433 protein [Mus musculus]
mmu-miR-34c-3p	226407	-
mmu-miR-34c-3p	223881	rho-related GTP-binding protein Rho6 precursor [Mus musculus]
mmu-miR-34c-3p	214593	-
mmu-miR-34c-3p	214290	zinc finger, CCHC domain containing 6, isoform CRA_b, partial [Mus musculus]
mmu-miR-34c-3p	207596	thrombospondin type-1 domain-containing protein 4 isoform b precursor [Mus musculus]
mmu-miR-34c-3p	207596	thrombospondin type-1 domain-containing protein 4 isoform a precursor [Mus musculus]
mmu-miR-34c-3p	195564	selection and upkeep of intraepithelial T-cells protein 3 isoform b precursor [Mus musculus]
mmu-miR-34c-3p	171095	interleukin-17 receptor C isoform 2 precursor [Mus musculus]
mmu-miR-34c-3p	170753	-
mmu-miR-34c-3p	140780	BMP-2-inducible protein kinase [Mus musculus]
mmu-miR-34c-3p	114615	-
mmu-miR-34c-3p	110695	alpha-aminoadipic semialdehyde dehydrogenase isoform a [Mus musculus]
mmu-miR-34c-3p	108071	metabotropic glutamate receptor 5 isoform b precursor [Mus musculus]
mmu-miR-34c-3p	108012	-
mmu-miR-34c-3p	107351	KN motif and ankyrin repeat domain-containing protein 1 [Mus musculus]
mmu-miR-34c-3p	105732	expressed sequence AA409316, partial [Mus musculus]
mmu-miR-34c-3p	104885	transmembrane protein 179 [Mus musculus]
mmu-miR-34c-3p	104859	tectonin beta-propeller repeat-containing protein 2 isoform 1 [Mus musculus]
mmu-miR-34c-3p	104859	mKIAA0297 protein [Mus musculus]
mmu-miR-34c-3p	104859	mKIAA0297 protein [Mus musculus]
mmu-miR-34c-3p	101100	tubulin monoglycylase TTLL3 isoform 2 [Mus musculus]
mmu-miR-34c-3p	99138	-
mmu-miR-34c-3p	98415	-
mmu-miR-34c-3p	93888	mKIAA1621 protein [Mus musculus]
mmu-miR-34c-3p	81004	F-box-like/WD repeat-containing protein TBL1XR1 [Mus musculus]
mmu-miR-34c-3p	80879	monocarboxylate transporter 4 [Mus musculus]
mmu-miR-34c-3p	78390	cytosolic phospholipase A2 delta [Mus musculus]
mmu-miR-34c-3p	78255	ras-specific guanine nucleotide-releasing factor RalGPS2 isoform a [Mus musculus]
mmu-miR-34c-3p	77248	-
mmu-miR-34c-3p	75721	RIKEN cDNA 4932414N04, partial [Mus musculus]
mmu-miR-34c-3p	75275	RIKEN cDNA 4930563P21, isoform CRA_a, partial [Mus musculus]
mmu-miR-34c-3p	74838	N-alpha-acetyltransferase 15, NatA auxiliary subunit [Mus musculus]
mmu-miR-34c-3p	74480	protein Smaug homolog 1 isoform 2 [Mus musculus]
mmu-miR-34c-3p	74480	protein Smaug homolog 1 isoform 1 [Mus musculus]
mmu-miR-34c-3p	74150	solute carrier family 35 member F5 [Mus musculus]
mmu-miR-34c-3p	72301	mCG141069, partial [Mus musculus]
mmu-miR-34c-3p	70767	-
mmu-miR-34c-3p	69399	uncharacterized protein C1orf21 homolog [Mus musculus]
mmu-miR-34c-3p	68949	-
mmu-miR-34c-3p	67991	nucleus accumbens-associated protein 2 isoform 2 [Mus musculus]
mmu-miR-34c-3p	67731	F-box only protein 32 [Mus musculus]
mmu-miR-34c-3p	66934	-
mmu-miR-34c-3p	66722	-
mmu-miR-34c-3p	59016	PREDICTED: THAP domain-containing protein 11 [Balaenoptera acutorostrata scammoni]
mmu-miR-34c-3p	57810	-
mmu-miR-34c-3p	56620	C-type lectin domain family 6 member A isoform 2 [Mus musculus]
mmu-miR-34c-3p	53310	mKIAA1232 protein [Mus musculus]
mmu-miR-34c-3p	52250	-
mmu-miR-34c-3p	52036	serine/threonine-protein phosphatase 6 regulatory subunit 3 isoform 2 [Mus musculus]
mmu-miR-34c-3p	52036	serine/threonine-protein phosphatase 6 regulatory subunit 3 isoform 1 [Mus musculus]
mmu-miR-34c-3p	52036	serine/threonine-protein phosphatase 6 regulatory subunit 3 isoform 3 [Mus musculus]
mmu-miR-34c-3p	50997	MAGUK p55 subfamily member 2 [Mus musculus]
mmu-miR-34c-3p	24045	secretory carrier-associated membrane protein 3 isoform 3 [Mus musculus]
mmu-miR-34c-3p	22030	TNF receptor-associated factor 2 isoform b [Mus musculus]
mmu-miR-34c-3p	22030	TNF receptor-associated factor 2 isoform a [Mus musculus]
mmu-miR-34c-3p	21841	nucleolysin TIA-1 isoform 1 [Mus musculus]
mmu-miR-34c-3p	21841	cytotoxic granule-associated RNA binding protein 1, isoform CRA_c, partial [Mus musculus]
mmu-miR-34c-3p	21841	cytotoxic granule-associated RNA binding protein 1, isoform CRA_d, partial [Mus musculus]
mmu-miR-34c-3p	20853	unnamed protein product [Mus musculus]
mmu-miR-34c-3p	20318	stromal cell derived factor 4, isoform CRA_b, partial [Mus musculus]
mmu-miR-34c-3p	19820	E3 ubiquitin-protein ligase RLIM [Mus musculus]
mmu-miR-34c-3p	19281	-
mmu-miR-34c-3p	19011	poly(U)-specific endoribonuclease isoform 2 precursor [Mus musculus]
mmu-miR-34c-3p	18704	phosphatidylinositol 4-phosphate 3-kinase C2 domain-containing subunit alpha [Mus musculus]
mmu-miR-34c-3p	18514	PREDICTED: pre-B-cell leukemia transcription factor 1 isoform X1 [Equus caballus]
mmu-miR-34c-3p	18245	ornithine decarboxylase antizyme [Mus musculus]
mmu-miR-34c-3p	18019	nuclear factor of activated T-cells, cytoplasmic, calcineurin-dependent 2, isoform CRA_b [Mus musculus]
mmu-miR-34c-3p	14962	complement factor B isoform 2 precursor [Mus musculus]
mmu-miR-34c-3p	14528	GTP cyclohydrolase 1 precursor [Mus musculus]
mmu-miR-34c-3p	14086	-
mmu-miR-34c-3p	13527	dystrobrevin alpha, isoform CRA_b, partial [Mus musculus]
mmu-miR-34c-3p	13506	-
mmu-miR-34c-3p	13506	-
mmu-miR-34c-3p	13506	-
mmu-miR-34c-3p	13436	PREDICTED: DNA (cytosine-5)-methyltransferase 3B isoform X3 [Mus musculus]
mmu-miR-34c-3p	13209	-
mmu-miR-34c-3p	12808	cordon-bleu, isoform CRA_b, partial [Mus musculus]
[truncated: 6,231 more rows]

## Sheet: 1569  pairs DE miRNA-DE mRNA 
miRNA id	Up/down regulation	mRNA	Up/Down Regulation
mmu-miR-2137	UP	Zfp575	Up
mmu-miR-3110-5p	UP	Zfp575	Up
mmu-miR-494-3p	UP	Zfp57	Up
mmu-miR-154-3p	UP	Zfp385c	Up
mmu-miR-34c-3p	UP	Zfos1	Up
mmu-miR-434-3p	UP	Zfhx3	Up
mmu-miR-701-3p	UP	Zcchc18	Up
mmu-miR-701-3p	UP	Zbtb42	Up
mmu-miR-410-3p	UP	Ypel2	Up
mmu-miR-6994-3p	UP	Xntrpc	Up
mmu-miR-212-3p	UP	Wnt10a	Up
mmu-miR-494-3p	UP	Vwa7	Up
mmu-miR-494-3p	UP	Vav1	Up
mmu-miR-3071-3p	UP	Vash2	Up
mmu-miR-299a-5p	UP	Vangl2	Up
mmu-miR-376a-3p	UP	Usp43	Up
mmu-miR-223-5p	UP	Usp43	Up
mmu-miR-300-3p	UP	Upk3b	Up
mmu-miR-212-5p	UP	Unc93b1	Up
mmu-miR-434-3p	UP	Uhrf1	Up
mmu-miR-376a-3p	UP	Ucp1	Up
mmu-miR-380-3p	UP	Ucn2	Up
mmu-miR-132-3p	UP	Tusc5	Up
mmu-miR-7649-3p	UP	Ttc9	Up
mmu-miR-496a-3p	UP	Ttc39a	Up
mmu-miR-376a-3p	UP	Ttc22	Up
mmu-miR-1193-3p	UP	Trpv2	Up
mmu-miR-223-5p	UP	Trpm4	Up
mmu-miR-21a-5p	UP	Trp63	Up
mmu-miR-494-3p	UP	Trp63	Up
mmu-miR-298-5p	UP	Trp53i11	Up
mmu-miR-223-5p	UP	Trip13	Up
mmu-miR-146b-5p	UP	Trim14	Up
mmu-miR-34b-5p	UP	Trim14	Up
mmu-miR-129-2-3p	UP	Trim12a	Up
mmu-miR-5128	UP	Tpx2	Up
mmu-miR-31-5p	UP	Top2a	Up
mmu-miR-380-3p	UP	Tnip3	Up
mmu-miR-300-3p	UP	Tmsb4x	Up
mmu-miR-667-3p	UP	Tmprss13	Up
mmu-miR-667-3p	UP	Tmem240	Up
mmu-miR-701-3p	UP	Tmem184b	Up
mmu-miR-34c-3p	UP	Tmem179	Up
mmu-miR-34b-3p	UP	Tmem179	Up
mmu-miR-2137	UP	Tmem158	Up
mmu-miR-466p-3p	UP	Tlr4	Up
mmu-miR-3071-3p	UP	Tlr4	Up
mmu-miR-34b-3p	UP	Tlr13	Up
mmu-miR-34c-5p	UP	Tifab	Up
mmu-miR-496a-3p	UP	Thsd1	Up
mmu-miR-21a-5p	UP	Tgfbi	Up
mmu-miR-3071-3p	UP	Tgfb2	Up
mmu-miR-541-5p	UP	Tcf19	Up
mmu-miR-132-3p	UP	Tbc1d9	Up
mmu-miR-376a-3p	UP	Tbc1d2	Up
mmu-miR-541-5p	UP	Tax1bp3	Up
mmu-miR-494-3p	UP	Tagln	Up
mmu-miR-146b-5p	UP	Sytl5	Up
mmu-miR-376a-3p	UP	Syk	Up
mmu-miR-541-5p	UP	Sulf2	Up
mmu-miR-667-3p	UP	Stox2	Up
mmu-miR-300-3p	UP	Stox1	Up
mmu-miR-511-3p	UP	Stil	Up
mmu-miR-496a-3p	UP	Stambpl1	Up
mmu-miR-154-3p	UP	St6galnac6	Up
mmu-miR-155-3p	UP	St6gal1	Up
mmu-miR-34b-3p	UP	St18	Up
mmu-miR-154-3p	UP	St14	Up
mmu-miR-380-3p	UP	Sspn	Up
mmu-miR-494-3p	UP	Ssh2	Up
mmu-miR-5121	UP	Sprr2e	Up
mmu-miR-541-5p	UP	Sprr1a	Up
mmu-miR-3071-3p	UP	Spns2	Up
mmu-miR-2137	UP	Sp9	Up
mmu-miR-155-3p	UP	Sobp	Up
mmu-miR-154-3p	UP	Smox	Up
mmu-miR-122-3p	UP	Smc2	Up
mmu-miR-124-5p	UP	Slit3	Up
mmu-miR-122-3p	UP	Slfn1	Up
mmu-miR-701-3p	UP	Slc7a15	Up
mmu-miR-409-5p	UP	Slc5a3	Up
mmu-miR-31-5p	UP	Slc34a2	Up
mmu-miR-376a-3p	UP	Slc2a10	Up
mmu-miR-409-5p	UP	Slc29a4	Up
mmu-miR-3110-5p	UP	Slc22a15	Up
mmu-miR-376a-3p	UP	Slc1a3	Up
mmu-miR-34c-3p	UP	Slc16a3	Up
mmu-miR-212-5p	UP	Sipa1l2	Up
mmu-miR-431-5p	UP	Sipa1l2	Up
mmu-miR-31-5p	UP	Shc2	Up
mmu-miR-212-5p	UP	Sh3rf2	Up
mmu-miR-155-3p	UP	Sfxn3	Up
mmu-miR-1193-3p	UP	Sfxn3	Up
mmu-miR-124-5p	UP	Setd7	Up
mmu-miR-5121	UP	Serpinh1	Up
mmu-miR-223-5p	UP	Serpina3m	Up
mmu-miR-206-3p	UP	Sema6d	Up
mmu-miR-143-5p	UP	Sema6b	Up
mmu-miR-21a-3p	UP	Sema6b	Up
mmu-miR-511-3p	UP	Sec14l1	Up
mmu-miR-182-3p	UP	Sdc3	Up
mmu-miR-409-5p	UP	Scn1b	Up
mmu-miR-496a-3p	UP	Sapcd1	Up
mmu-miR-212-5p	UP	Samd4	Up
mmu-miR-34c-3p	UP	Samd4	Up
mmu-miR-34b-3p	UP	Samd4	Up
mmu-miR-2137	UP	Rusc2	Up
mmu-miR-410-3p	UP	Runx2	Up
mmu-miR-154-3p	UP	Runx2	Up
mmu-miR-369-3p	UP	Runx2	Up
mmu-miR-494-3p	UP	Runx1	Up
mmu-miR-6994-3p	UP	Rtn4	Up
mmu-miR-206-3p	UP	Rrm1	Up
mmu-miR-124-3p	UP	Rras	Up
mmu-miR-5121	UP	Rock2	Up
mmu-miR-511-3p	UP	Robo4	Up
mmu-miR-34c-3p	UP	Rnd1	Up
mmu-miR-409-5p	UP	Rn45s	Up
mmu-miR-34c-5p	UP	Rhoh	Up
mmu-miR-667-3p	UP	Rhoh	Up
mmu-miR-369-3p	UP	Rhoh	Up
mmu-miR-380-3p	UP	Rftn1	Up
mmu-miR-5121	UP	Rcn1	Up
mmu-miR-2137	UP	Rbfox3	Up
mmu-miR-409-5p	UP	Rbfox2	Up
mmu-miR-511-5p	UP	Rbfox2	Up
mmu-miR-7649-3p	UP	Pwwp2b	Up
mmu-miR-154-3p	UP	Pvrl2	Up
mmu-miR-124-3p	UP	Ptprv	Up
mmu-miR-21a-5p	UP	Ptpru	Up
mmu-miR-124-3p	UP	Ptpn14	Up
mmu-miR-3071-3p	UP	Ptpn12	Up
mmu-miR-369-3p	UP	Ptk7	Up
mmu-miR-122-3p	UP	Ptgfrn	Up
mmu-miR-21a-5p	UP	Prss46	Up
mmu-miR-7649-3p	UP	Prkg1	Up
mmu-miR-380-3p	UP	Prkcg	Up
mmu-miR-433-3p	UP	Prickle2	Up
mmu-miR-3110-5p	UP	Pram1	Up
mmu-miR-21a-3p	UP	Ppp1r13l	Up
mmu-miR-369-3p	UP	Popdc3	Up
mmu-miR-129-2-3p	UP	Plp2	Up
mmu-miR-206-3p	UP	Plin4	Up
mmu-miR-409-5p	UP	Plekhh2	Up
mmu-miR-124-3p	UP	Plekhg2	Up
mmu-miR-147-3p	UP	Plec	Up
mmu-miR-212-5p	UP	Plec	Up
mmu-miR-409-5p	UP	Pla2g15	Up
mmu-miR-122-3p	UP	Pkn3	Up
mmu-miR-1193-3p	UP	Pkm	Up
mmu-miR-129-2-3p	UP	Pik3ip1	Up
mmu-miR-466p-3p	UP	Pik3cd	Up
mmu-miR-298-5p	UP	Pid1	Up
mmu-miR-466p-3p	UP	Pid1	Up
mmu-miR-511-3p	UP	Phtf1os	Up
mmu-miR-380-3p	UP	Phtf1os	Up
mmu-miR-124-3p	UP	Phf19	Up
mmu-miR-124-3p	UP	Pgr	Up
mmu-miR-34c-5p	UP	Penk	Up
mmu-miR-344d-3p	UP	Pear1	Up
mmu-miR-2137	UP	Pear1	Up
mmu-miR-298-5p	UP	Pear1	Up
mmu-miR-434-3p	UP	Pear1	Up
mmu-miR-3110-5p	UP	Pdzd4	Up
mmu-miR-369-3p	UP	Pdzd4	Up
mmu-miR-21a-5p	UP	Pdp1	Up
mmu-miR-34c-5p	UP	Pdlim7	Up
mmu-miR-34b-5p	UP	Pcdhgc5	Up
mmu-miR-125b-1-3p	UP	Pcdhgc3	Up
mmu-miR-34c-3p	UP	Pcdhb17	Up
mmu-miR-410-3p	UP	Pcdh19	Up
mmu-miR-122-3p	UP	Pappa	Up
mmu-miR-434-3p	UP	Otx1	Up
mmu-miR-434-3p	UP	Orai2	Up
mmu-miR-7649-3p	UP	Nxpe5	Up
mmu-miR-31-5p	UP	Nxpe5	Up
mmu-miR-344d-3p	UP	Ntrk2	Up
mmu-miR-212-5p	UP	Ntrk2	Up
mmu-miR-2137	UP	Ntrk2	Up
mmu-miR-3071-3p	UP	Ntn3	Up
mmu-miR-369-3p	UP	Nsg1	Up
mmu-miR-667-3p	UP	Nrp2	Up
mmu-miR-154-3p	UP	Nradd	Up
mmu-miR-409-5p	UP	Nptx1	Up
mmu-miR-2137	UP	Npcd	Up
mmu-miR-223-5p	UP	Npcd	Up
mmu-miR-21a-5p	UP	Noxo1	Up
mmu-miR-34c-3p	UP	Nova2	Up
mmu-miR-298-5p	UP	Nova2	Up
mmu-miR-300-3p	UP	Nova2	Up
mmu-miR-124-3p	UP	Nos3	Up
mmu-miR-496a-3p	UP	Nin	Up
mmu-miR-344d-3p	UP	Nid2	Up
mmu-miR-344d-3p	UP	Nid1	Up
mmu-miR-701-3p	UP	Nfkbie	Up
mmu-miR-511-5p	UP	Nfkbie	Up
mmu-miR-298-5p	UP	Nckap5l	Up
mmu-miR-3110-5p	UP	Nckap5l	Up
mmu-miR-21a-5p	UP	Nckap1l	Up
mmu-miR-212-5p	UP	Ncam1	Up
mmu-miR-212-5p	UP	Nav3	Up
mmu-miR-143-5p	UP	Nat8l	Up
mmu-miR-2137	UP	Nat8l	Up
mmu-miR-298-5p	UP	Nat8l	Up
mmu-miR-212-5p	UP	Myom1	Up
mmu-miR-299a-5p	UP	Myoc	Up
mmu-miR-6994-3p	UP	Myo1h	Up
mmu-miR-344d-3p	UP	Myo1b	Up
mmu-miR-541-5p	UP	Mybl1	Up
mmu-miR-667-3p	UP	Myadm	Up
mmu-miR-5128	UP	Muc15	Up
mmu-miR-511-3p	UP	Ms4a6c	Up
mmu-miR-433-3p	UP	Ms4a6c	Up
mmu-miR-667-3p	UP	Mpzl1	Up
mmu-miR-124-5p	UP	Mob3a	Up
mmu-miR-125b-1-3p	UP	Mob3a	Up
mmu-miR-21a-3p	UP	Moap1	Up
mmu-miR-125b-1-3p	UP	Mmp23	Up
mmu-miR-5121	UP	Mki67	Up
mmu-miR-212-3p	UP	Mki67	Up
mmu-miR-511-5p	UP	Mirt1	Up
mmu-miR-409-5p	UP	Mfge8	Up
mmu-miR-182-3p	UP	Meis3	Up
mmu-miR-129-2-3p	UP	Meg3	Up
mmu-miR-496a-3p	UP	Meg3	Up
mmu-miR-154-3p	UP	Meg3	Up
mmu-miR-376a-3p	UP	Mdga1	Up
mmu-miR-212-3p	UP	Mdga1	Up
mmu-miR-1193-3p	UP	Mdfi	Up
mmu-miR-2137	UP	Mbp	Up
mmu-miR-376a-3p	UP	Mast1	Up
mmu-miR-5121	UP	Mark1	Up
mmu-miR-496a-3p	UP	Map6	Up
mmu-miR-380-3p	UP	Map6	Up
mmu-miR-541-5p	UP	Map4	Up
mmu-miR-34b-3p	UP	Map4	Up
mmu-miR-124-5p	UP	Map3k1	Up
mmu-miR-212-5p	UP	Map1a	Up
mmu-miR-299a-5p	UP	Map1a	Up
mmu-miR-496a-3p	UP	Man1c1	Up
mmu-miR-494-3p	UP	Mal	Up
mmu-miR-147-3p	UP	Maff	Up
mmu-miR-1193-3p	UP	Maff	Up
mmu-miR-155-3p	UP	Macc1	Up
mmu-miR-31-5p	UP	Lyl1	Up
mmu-miR-511-5p	UP	Ly6e	Up
mmu-miR-701-3p	UP	Ly6c1	Up
mmu-miR-143-5p	UP	Lrrfip1	Up
mmu-miR-21a-3p	UP	Lrrfip1	Up
mmu-miR-132-3p	UP	Lrrc8c	Up
mmu-miR-376a-3p	UP	Lrrc8c	Up
mmu-miR-212-5p	UP	Lrrc32	Up
mmu-miR-466p-3p	UP	Loxl3	Up
mmu-miR-146b-5p	UP	Liph	Up
mmu-miR-667-3p	UP	Liph	Up
mmu-miR-344d-3p	UP	Lhx6	Up
mmu-miR-433-3p	UP	Lgals9	Up
mmu-miR-182-3p	UP	Lgals3bp	Up
mmu-miR-376a-3p	UP	Ldb3	Up
mmu-miR-147-3p	UP	Laptm5	Up
mmu-miR-5128	UP	Lamb3	Up
mmu-miR-212-5p	UP	Lama5	Up
mmu-miR-34b-5p	UP	Lama5	Up
mmu-miR-1193-3p	UP	Lama5	Up
mmu-miR-298-5p	UP	Krt83	Up
mmu-miR-3110-5p	UP	Kntc1	Up
mmu-miR-667-3p	UP	Kntc1	Up
mmu-miR-1193-3p	UP	Klhl30	Up
mmu-miR-431-5p	UP	Klf6	Up
mmu-miR-206-3p	UP	Kirrel	Up
mmu-miR-494-3p	UP	Kif1a	Up
mmu-miR-147-3p	UP	Kif18b	Up
mmu-miR-21a-5p	UP	Kctd10	Up
mmu-miR-3110-5p	UP	Kcnk6	Up
mmu-miR-34b-5p	UP	Kcnh2	Up
mmu-miR-511-3p	UP	Jam2	Up
mmu-miR-6994-3p	UP	Itpr3	Up
mmu-miR-2137	UP	Itgb4	Up
mmu-miR-212-5p	UP	Itga9	Up
mmu-miR-147-3p	UP	Itga6	Up
mmu-miR-496a-3p	UP	Itga5	Up
mmu-miR-541-5p	UP	Irf4	Up
mmu-miR-3110-5p	UP	Iqgap3	Up
mmu-miR-5121	UP	Iqgap1	Up
mmu-miR-431-5p	UP	Iqgap1	Up
mmu-miR-155-3p	UP	Inpp5d	Up
mmu-miR-376a-3p	UP	Inhbb	Up
mmu-miR-541-5p	UP	Inhbb	Up
mmu-miR-155-3p	UP	Inf2	Up
mmu-miR-298-5p	UP	Il4ra	Up
mmu-miR-31-5p	UP	Il1r1	Up
mmu-miR-124-3p	UP	Igsf9b	Up
mmu-miR-410-3p	UP	Igsf9b	Up
mmu-miR-466p-3p	UP	Igsf9b	Up
mmu-miR-434-3p	UP	Igsf9b	Up
mmu-miR-3071-3p	UP	Ifrd1	Up
mmu-miR-147-3p	UP	Ifnlr1	Up
mmu-miR-147-3p	UP	Ica1l	Up
mmu-miR-376a-3p	UP	Htra3	Up
mmu-miR-433-3p	UP	Hspg2	Up
mmu-miR-1193-3p	UP	Hspg2	Up
mmu-miR-154-3p	UP	Hspb2	Up
mmu-miR-154-3p	UP	Hrh2	Up
mmu-miR-369-3p	UP	Hrh2	Up
mmu-miR-511-3p	UP	Hoxc9	Up
mmu-miR-7649-3p	UP	Hmcn1	Up
mmu-miR-2137	UP	Hmcn1	Up
mmu-miR-21a-3p	UP	Hmcn1	Up
mmu-miR-21a-3p	UP	Hk3	Up
mmu-miR-154-3p	UP	Hk3	Up
mmu-miR-146b-5p	UP	Hivep3	Up
mmu-miR-212-5p	UP	Hipk4	Up
mmu-miR-434-3p	UP	Hip1	Up
mmu-miR-431-5p	UP	Hic1	Up
mmu-miR-155-3p	UP	Hhipl2	Up
mmu-miR-299a-5p	UP	Hhipl2	Up
mmu-miR-701-3p	UP	Havcr2	Up
mmu-miR-223-5p	UP	Havcr1	Up
mmu-miR-431-5p	UP	Gsto1	Up
mmu-miR-212-3p	UP	Gpr27	Up
mmu-miR-154-3p	UP	Gpr161	Up
mmu-miR-298-5p	UP	Gp1bb	Up
mmu-miR-212-3p	UP	Gng8	Up
mmu-miR-7649-3p	UP	Gm5622	Up
mmu-miR-298-5p	UP	Gm5622	Up
mmu-miR-380-3p	UP	Gm4788	Up
mmu-miR-122-3p	UP	Gm3636	Up
mmu-miR-511-5p	UP	Gjc1	Up
mmu-miR-344d-3p	UP	Gjb4	Up
mmu-miR-34c-3p	UP	Gins2	Up
mmu-miR-344d-3p	UP	Ggta1	Up
mmu-miR-34c-3p	UP	Gch1	Up
mmu-miR-34b-3p	UP	Gch1	Up
mmu-miR-410-3p	UP	Fzd2	Up
mmu-miR-376a-3p	UP	Fut4	Up
mmu-miR-380-3p	UP	Fut2	Up
mmu-miR-433-3p	UP	Fut10	Up
mmu-miR-34c-3p	UP	Fscn1	Up
mmu-miR-369-3p	UP	Frmd6	Up
mmu-miR-129-2-3p	UP	Foxm1	Up
mmu-miR-344d-3p	UP	Fn1	Up
mmu-miR-409-5p	UP	Flt1	Up
mmu-miR-124-5p	UP	Flnc	Up
mmu-miR-667-3p	UP	Flnc	Up
mmu-miR-34c-5p	UP	Fkbp10	Up
mmu-miR-146b-5p	UP	Fkbp10	Up
mmu-miR-34b-5p	UP	Fkbp10	Up
mmu-miR-5121	UP	Fhdc1	Up
mmu-miR-182-3p	UP	Fhdc1	Up
mmu-miR-146b-5p	UP	Fga	Up
mmu-miR-122-3p	UP	Fermt3	Up
mmu-miR-124-3p	UP	Fbxw9	Up
mmu-miR-409-5p	UP	Fbxw18	Up
mmu-miR-667-3p	UP	Fbxw10	Up
mmu-miR-34c-3p	UP	Fbxo32	Up
mmu-miR-124-5p	UP	Fbn2	Up
mmu-miR-494-3p	UP	Fbn2	Up
mmu-miR-212-3p	UP	Fbn2	Up
mmu-miR-124-5p	UP	Fbn1	Up
mmu-miR-34b-3p	UP	Fam198b	Up
mmu-miR-300-3p	UP	Fam109b	Up
mmu-miR-132-3p	UP	F13a1	Up
mmu-miR-212-3p	UP	F13a1	Up
mmu-miR-344d-3p	UP	Evl	Up
mmu-miR-496a-3p	UP	Evi2a	Up
mmu-miR-34c-5p	UP	Eva1c	Up
mmu-miR-7649-3p	UP	Espl1	Up
mmu-miR-212-5p	UP	Espl1	Up
mmu-miR-2137	UP	Espl1	Up
mmu-miR-511-5p	UP	Ercc6l	Up
mmu-miR-434-3p	UP	Ercc1	Up
mmu-miR-34b-5p	UP	Epx	Up
mmu-miR-511-3p	UP	Entpd3	Up
mmu-miR-223-5p	UP	Entpd3	Up
mmu-miR-124-3p	UP	Eng	Up
mmu-miR-122-3p	UP	Eln	Up
mmu-miR-124-3p	UP	Ehf	Up
mmu-miR-299a-5p	UP	Efna5	Up
mmu-miR-223-5p	UP	Efemp1	Up
mmu-miR-212-5p	UP	Dysf	Up
mmu-miR-344d-3p	UP	Dsg2	Up
mmu-miR-122-3p	UP	Dsel	Up
mmu-miR-146b-5p	UP	Dscaml1	Up
mmu-miR-223-5p	UP	Dpysl3	Up
mmu-miR-298-5p	UP	Dock11	Up
mmu-miR-34c-3p	UP	Dnmt3b	Up
mmu-miR-3071-3p	UP	Dnmt3b	Up
mmu-miR-434-3p	UP	Dnm3os	Up
mmu-miR-212-5p	UP	Dmkn	Up
mmu-miR-1193-3p	UP	Ddit4l	Up
mmu-miR-433-3p	UP	Dctd	Up
mmu-miR-299a-5p	UP	Dcbld2	Up
mmu-miR-5121	UP	D730005E14Rik	Up
mmu-miR-125b-1-3p	UP	D030025P21Rik	Up
mmu-miR-431-5p	UP	Cyth3	Up
mmu-miR-3071-3p	UP	Cyp4f16	Up
mmu-miR-376a-3p	UP	Cyp1b1	Up
mmu-miR-1193-3p	UP	Csdc2	Up
mmu-miR-147-3p	UP	Creb5	Up
mmu-miR-34b-5p	UP	Creb5	Up
mmu-miR-212-5p	UP	Cpne8	Up
mmu-miR-212-3p	UP	Coro1a	Up
mmu-miR-155-3p	UP	Col8a2	Up
mmu-miR-701-3p	UP	Col6a3	Up
mmu-miR-125b-1-3p	UP	Col5a1	Up
mmu-miR-21a-5p	UP	Col18a1	Up
mmu-miR-129-2-3p	UP	Col17a1	Up
mmu-miR-431-5p	UP	Col12a1	Up
mmu-miR-496a-3p	UP	Cntn1	Up
mmu-miR-206-3p	UP	Cnp	Up
mmu-miR-122-3p	UP	Cmtm3	Up
mmu-miR-132-3p	UP	Clu	Up
mmu-miR-3071-3p	UP	Clspn	Up
mmu-miR-212-5p	UP	Clip3	Up
mmu-miR-34c-3p	UP	Clec4n	Up
mmu-miR-701-3p	UP	Cldn4	Up
mmu-miR-132-3p	UP	Cldn16	Up
mmu-miR-409-5p	UP	Cidec	Up
mmu-miR-466p-3p	UP	Chek1	Up
mmu-miR-409-5p	UP	Cfd	Up
mmu-miR-541-5p	UP	Cfap45	Up
mmu-miR-154-3p	UP	Ces2g	Up
mmu-miR-154-3p	UP	Ces2e	Up
mmu-miR-154-3p	UP	Cerk	Up
mmu-miR-1193-3p	UP	Cerk	Up
mmu-miR-212-5p	UP	Cenpf	Up
mmu-miR-541-5p	UP	Celf5	Up
mmu-miR-143-5p	UP	Celf4	Up
mmu-miR-155-3p	UP	Celf3	Up
mmu-miR-122-3p	UP	Celf2	Up
mmu-miR-34c-5p	UP	Celf2	Up
mmu-miR-34b-5p	UP	Celf2	Up
mmu-miR-212-5p	UP	Cdsn	Up
mmu-miR-7649-3p	UP	Cdc6	Up
mmu-miR-132-3p	UP	Cd93	Up
mmu-miR-1193-3p	UP	Cd93	Up
mmu-miR-376a-3p	UP	Cd84	Up
mmu-miR-496a-3p	UP	Cd44	Up
mmu-miR-5128	UP	Cd38	Up
mmu-miR-667-3p	UP	Cd33	Up
mmu-miR-376a-3p	UP	Cd180	Up
mmu-miR-701-3p	UP	Cd163	Up
mmu-miR-124-3p	UP	Ccsap	Up
mmu-miR-21a-5p	UP	Ccdc88a	Up
mmu-miR-434-3p	UP	Ccdc85b	Up
mmu-miR-125b-1-3p	UP	Ccdc184	Up
mmu-miR-21a-5p	UP	Ccdc116	Up
mmu-miR-2137	UP	Catip	Up
mmu-miR-344d-3p	UP	Cast	Up
mmu-miR-5128	UP	Casp14	Up
mmu-miR-511-3p	UP	Capn2	Up
mmu-miR-541-5p	UP	Capn2	Up
mmu-miR-410-3p	UP	Camk2d	Up
mmu-miR-494-3p	UP	Camk2a	Up
mmu-miR-6994-3p	UP	Camk2a	Up
mmu-miR-434-3p	UP	Cacnb3	Up
mmu-miR-129-2-3p	UP	Cacna1c	Up
mmu-miR-212-5p	UP	Cacna1c	Up
mmu-miR-511-3p	UP	Cacna1c	Up
mmu-miR-300-3p	UP	Cacna1c	Up
mmu-miR-667-3p	UP	C77080	Up
mmu-miR-344d-3p	UP	C7	Up
mmu-miR-1193-3p	UP	C5ar2	Up
mmu-miR-369-3p	UP	C5ar1	Up
mmu-miR-147-3p	UP	C1qtnf7	Up
mmu-miR-34c-5p	UP	C1qtnf7	Up
mmu-miR-34b-5p	UP	C1qtnf7	Up
mmu-miR-155-3p	UP	Bzw2	Up
mmu-miR-667-3p	UP	Brsk1	Up
mmu-miR-2137	UP	Bnip2	Up
mmu-miR-31-5p	UP	Bmp8b	Up
mmu-miR-124-5p	UP	Bmp1	Up
mmu-miR-380-3p	UP	Bmp1	Up
mmu-miR-299a-5p	UP	Birc5	Up
mmu-miR-511-5p	UP	Birc5	Up
mmu-miR-433-3p	UP	Bex1	Up
mmu-miR-299a-5p	UP	Bco1	Up
mmu-miR-146b-5p	UP	B4galt6	Up
mmu-miR-34c-5p	UP	B4galt2	Up
mmu-miR-132-3p	UP	B4galnt2	Up
mmu-miR-212-3p	UP	B4galnt2	Up
mmu-miR-376a-3p	UP	B3gnt3	Up
mmu-miR-466p-3p	UP	B3galt1	Up
mmu-miR-21a-3p	UP	Atp8b1	Up
mmu-miR-431-5p	UP	Atp1a3	Up
mmu-miR-298-5p	UP	Atg9b	Up
mmu-miR-146b-5p	UP	Armcx4	Up
mmu-miR-129-2-3p	UP	Armcx2	Up
mmu-miR-300-3p	UP	Arhgef40	Up
mmu-miR-701-3p	UP	Arhgap9	Up
mmu-miR-21a-3p	UP	Arhgap25	Up
mmu-miR-206-3p	UP	Arhgap25	Up
mmu-miR-6994-3p	UP	Arhgap19	Up
mmu-miR-124-5p	UP	Arg1	Up
mmu-miR-31-5p	UP	Arfgef3	Up
mmu-miR-300-3p	UP	Arfgef3	Up
mmu-miR-433-3p	UP	Arfgef3	Up
mmu-miR-409-5p	UP	Apbb1ip	Up
mmu-miR-34c-3p	UP	Ap1s2	Up
mmu-miR-34b-3p	UP	Anxa5	Up
mmu-miR-701-3p	UP	Amotl1	Up
mmu-miR-21a-3p	UP	Amotl1	Up
mmu-miR-299a-5p	UP	Amigo2	Up
mmu-miR-7649-3p	UP	Amica1	Up
mmu-miR-182-3p	UP	Alox5	Up
mmu-miR-300-3p	UP	Aldh1a1	Up
mmu-miR-212-5p	UP	Akna	Up
mmu-miR-494-3p	UP	Ajuba	Up
mmu-miR-206-3p	UP	AI115009	Up
mmu-miR-431-5p	UP	Adra1b	Up
mmu-miR-223-5p	UP	Adora2a	Up
mmu-miR-155-3p	UP	Adgrg1	Up
mmu-miR-34c-5p	UP	Add2	Up
mmu-miR-369-3p	UP	Add2	Up
mmu-miR-7649-3p	UP	Adcyap1r1	Up
mmu-miR-376a-3p	UP	Adcyap1r1	Up
mmu-miR-701-3p	UP	Adcyap1r1	Up
mmu-miR-132-3p	UP	Adcy7	Up
mmu-miR-380-3p	UP	Adcy3	Up
mmu-miR-667-3p	UP	Adamts7	Up
mmu-miR-6994-3p	UP	Adamts4	Up
mmu-miR-496a-3p	UP	Adamts2	Up
mmu-miR-409-5p	UP	Adamts10	Up
mmu-miR-541-5p	UP	Adam19	Up
mmu-miR-124-3p	UP	Adam12	Up
mmu-miR-31-5p	UP	Acsl4	Up
mmu-miR-3071-3p	UP	Acod1	Up
mmu-miR-5121	UP	Abcg1	Up
mmu-miR-369-3p	UP	Abca1	Up
mmu-miR-7649-3p	UP	9930012K11Rik	Up
mmu-miR-146b-5p	UP	9530053A07Rik	Up
mmu-miR-511-5p	UP	9030625G05Rik	Up
mmu-miR-212-3p	UP	9030025P20Rik	Up
mmu-miR-701-3p	UP	6030408B16Rik	Up
mmu-miR-466p-3p	UP	6030408B16Rik	Up
mmu-miR-298-5p	UP	5730409E04Rik	Up
mmu-miR-511-5p	UP	5033406O09Rik	Up
mmu-miR-410-3p	UP	4930546K05Rik	Up
mmu-miR-132-3p	UP	3110039I08Rik	Up
mmu-miR-494-3p	UP	3110039I08Rik	Up
mmu-miR-496a-3p	UP	2310022B05Rik	Up
mmu-miR-7649-3p	UP	1700066B19Rik	Up
mmu-miR-667-3p	UP	1700047I17Rik2	Up
mmu-miR-34c-3p	UP	1700025G04Rik	Up
mmu-miR-496a-3p	UP	Zswim5	Down
mmu-miR-5128	UP	Zmynd12	Down
mmu-miR-2137	UP	Zmynd12	Down
mmu-miR-1193-3p	UP	Zmynd10	Down
mmu-miR-129-2-3p	UP	Zfp93	Down
mmu-miR-155-3p	UP	Zc2hc1c	Down
mmu-miR-701-3p	UP	Xylb	Down
mmu-miR-298-5p	UP	Xylb	Down
mmu-miR-369-3p	UP	Xpnpep3	Down
mmu-miR-122-3p	UP	Wwp1	Down
mmu-miR-380-3p	UP	Wwp1	Down
mmu-miR-155-3p	UP	Wwp1	Down
mmu-miR-380-3p	UP	Wnt11	Down
mmu-miR-410-3p	UP	Wnk2	Down
mmu-miR-21a-5p	UP	Whrn	Down
mmu-miR-2137	UP	Whrn	Down
mmu-miR-298-5p	UP	Whrn	Down
mmu-miR-21a-5p	UP	Wdr78	Down
mmu-miR-496a-3p	UP	Vwce	Down
mmu-miR-129-2-3p	UP	Vwa8	Down
mmu-miR-380-3p	UP	Vwa2	Down
mmu-miR-410-3p	UP	Vnn1	Down
mmu-miR-34b-3p	UP	Uroc1	Down
mmu-miR-122-3p	UP	Uqcc1	Down
mmu-miR-409-5p	UP	Uqcc1	Down
mmu-miR-6994-3p	UP	Upb1	Down
mmu-miR-494-3p	UP	Uhmk1	Down
mmu-miR-369-3p	UP	Ugt3a2	Down
mmu-miR-541-5p	UP	Ugt2b38	Down
mmu-miR-433-3p	UP	Tyw3	Down
mmu-miR-1193-3p	UP	Tysnd1	Down
mmu-miR-31-5p	UP	Tulp3	Down
mmu-miR-6994-3p	UP	Ttc41	Down
mmu-miR-212-3p	UP	Ttc38	Down
mmu-miR-701-3p	UP	Ttc25	Down
mmu-miR-5128	UP	Tspan13	Down
mmu-miR-143-5p	UP	Tsku	Down
mmu-miR-129-2-3p	UP	Tsga10	Down
mmu-miR-376a-3p	UP	Trpv4	Down
mmu-miR-5121	UP	Trmt2b	Down
mmu-miR-34c-5p	UP	Trappc9	Down
mmu-miR-494-3p	UP	Trappc9	Down
mmu-miR-21a-3p	UP	Trabd2b	Down
mmu-miR-433-3p	UP	Tpk1	Down
mmu-miR-494-3p	UP	Tmtc4	Down
mmu-miR-143-5p	UP	Tmprss9	Down
mmu-miR-154-3p	UP	Tmprss9	Down
mmu-miR-344d-3p	UP	Tmem64	Down
mmu-miR-154-3p	UP	Tmem254a	Down
mmu-miR-344d-3p	UP	Tmem229a	Down
mmu-miR-409-5p	UP	Tmem176a	Down
mmu-miR-494-3p	UP	Tmem174	Down
mmu-miR-431-5p	UP	Tmco3	Down
mmu-miR-511-3p	UP	Tmc3	Down
mmu-miR-122-3p	UP	Timm9	Down
mmu-miR-701-3p	UP	Them7	Down
mmu-miR-380-3p	UP	Tefm	Down
mmu-miR-466p-3p	UP	Tbc1d13	Down
mmu-miR-146b-5p	UP	Tanc2	Down
mmu-miR-380-3p	UP	Tanc2	Down
mmu-miR-21a-5p	UP	Syt14	Down
mmu-miR-154-3p	UP	Syt1	Down
mmu-miR-129-2-3p	UP	Sypl2	Down
mmu-miR-667-3p	UP	Sufu	Down
mmu-miR-132-3p	UP	Stxbp5l	Down
mmu-miR-212-5p	UP	Stra6	Down
mmu-miR-129-2-3p	UP	Sptlc3	Down
mmu-miR-298-5p	UP	Spry3	Down
mmu-miR-34c-5p	UP	Snx7	Down
mmu-miR-34b-5p	UP	Snx7	Down
mmu-miR-143-5p	UP	Snx27	Down
mmu-miR-223-5p	UP	Smpd2	Down
mmu-miR-376a-3p	UP	Slco3a1	Down
mmu-miR-494-3p	UP	Slco1a4	Down
mmu-miR-299a-5p	UP	Slco1a1	Down
mmu-miR-369-3p	UP	Slc7a9	Down
mmu-miR-34b-3p	UP	Slc5a6	Down
mmu-miR-701-3p	UP	Slc5a4a	Down
mmu-miR-146b-5p	UP	Slc4a9	Down
mmu-miR-223-5p	UP	Slc4a9	Down
mmu-miR-701-3p	UP	Slc4a4	Down
mmu-miR-146b-5p	UP	Slc44a4	Down
mmu-miR-21a-3p	UP	Slc39a5	Down
mmu-miR-380-3p	UP	Slc39a11	Down
mmu-miR-298-5p	UP	Slc35d2	Down
mmu-miR-132-3p	UP	Slc34a3	Down
mmu-miR-433-3p	UP	Slc30a2	Down
mmu-miR-298-5p	UP	Slc25a42	Down
mmu-miR-667-3p	UP	Slc25a42	Down
mmu-miR-3110-5p	UP	Slc25a34	Down
mmu-miR-701-3p	UP	Slc25a19	Down
mmu-miR-206-3p	UP	Slc25a13	Down
mmu-miR-376a-3p	UP	Slc22a30	Down
mmu-miR-34b-3p	UP	Slc22a23	Down
mmu-miR-31-5p	UP	Slc22a23	Down
mmu-miR-155-3p	UP	Slc1a7	Down
mmu-miR-182-3p	UP	Slc1a2	Down
mmu-miR-541-5p	UP	Slc17a1	Down
mmu-miR-3110-5p	UP	Slc13a5	Down
mmu-miR-434-3p	UP	Slc13a2os	Down
mmu-miR-155-3p	UP	Slc12a7	Down
mmu-miR-3071-3p	UP	Slc10a2	Down
mmu-miR-147-3p	UP	Shc3	Down
mmu-miR-132-3p	UP	Sez6l	Down
mmu-miR-212-3p	UP	Sez6l	Down
mmu-miR-34c-5p	UP	Sepp1	Down
mmu-miR-132-3p	UP	Sema5b	Down
mmu-miR-3110-5p	UP	Sec14l3	Down
mmu-miR-223-5p	UP	Sec14l3	Down
mmu-miR-5121	UP	Sardh	Down
mmu-miR-1193-3p	UP	Ryr2	Down
mmu-miR-300-3p	UP	Rundc3b	Down
mmu-miR-299a-5p	UP	Rreb1	Down
mmu-miR-299a-5p	UP	Rnf32	Down
mmu-miR-132-3p	UP	Rmdn3	Down
mmu-miR-2137	UP	Rmdn3	Down
mmu-miR-146b-5p	UP	Rhov	Down
mmu-miR-155-3p	UP	Rhov	Down
mmu-miR-124-3p	UP	Rgl1	Down
mmu-miR-466p-3p	UP	Rgl1	Down
mmu-miR-1193-3p	UP	Reps2	Down
mmu-miR-300-3p	UP	Rd3	Down
mmu-miR-147-3p	UP	Rbpms2	Down
mmu-miR-124-5p	UP	Rbm47	Down
mmu-miR-511-3p	UP	Rbm47	Down
mmu-miR-34c-3p	UP	Ralgps2	Down
mmu-miR-7649-3p	UP	Ralgapa2	Down
mmu-miR-2137	UP	Ralgapa2	Down
mmu-miR-143-5p	UP	R3hdml	Down
mmu-miR-129-2-3p	UP	Pvalb	Down
mmu-miR-3071-3p	UP	Ptgr2	Down
mmu-miR-433-3p	UP	Pter	Down
mmu-miR-701-3p	UP	Prlr	Down
mmu-miR-3110-5p	UP	Prkcz	Down
mmu-miR-511-3p	UP	Ppp1r16a	Down
mmu-miR-410-3p	UP	Ppa2	Down
mmu-miR-3110-5p	UP	Pnpla1	Down
mmu-miR-124-5p	UP	Pm20d1	Down
mmu-miR-21a-5p	UP	Plekha8	Down
mmu-miR-410-3p	UP	Plekha8	Down
mmu-miR-3071-3p	UP	Pla2g6	Down
mmu-miR-299a-5p	UP	Pipox	Down
mmu-miR-212-5p	UP	Pi4ka	Down
mmu-miR-21a-3p	UP	Pi4ka	Down
mmu-miR-380-3p	UP	Phyhd1	Down
mmu-miR-146b-5p	UP	Pgm2	Down
mmu-miR-431-5p	UP	Peli2	Down
mmu-miR-124-3p	UP	Pecr	Down
mmu-miR-6994-3p	UP	Pdss2	Down
mmu-miR-409-5p	UP	Pdk3	Down
mmu-miR-5121	UP	Pcyt2	Down
mmu-miR-376a-3p	UP	Pcx	Down
mmu-miR-143-5p	UP	Pcsk5	Down
mmu-miR-2137	UP	Pcdh17	Down
mmu-miR-182-3p	UP	Pccb	Down
mmu-miR-511-5p	UP	Pax9	Down
mmu-miR-125b-1-3p	UP	Paqr9	Down
mmu-miR-1193-3p	UP	Pank1	Down
mmu-miR-132-3p	UP	P2rx3	Down
mmu-miR-410-3p	UP	Oxgr1	Down
mmu-miR-6994-3p	UP	Oxct2a	Down
mmu-miR-21a-5p	UP	Osgepl1	Down
mmu-miR-143-5p	UP	Osbpl9	Down
mmu-miR-298-5p	UP	Osbpl8	Down
mmu-miR-154-3p	UP	Osbpl8	Down
mmu-miR-344d-3p	UP	Osbpl6	Down
mmu-miR-129-2-3p	UP	Osbp2	Down
mmu-miR-223-5p	UP	Olfm3	Down
mmu-miR-434-3p	UP	Nxpe3	Down
mmu-miR-182-3p	UP	Nubpl	Down
mmu-miR-34b-5p	UP	Nrap	Down
mmu-miR-124-3p	UP	Npm3	Down
mmu-miR-31-5p	UP	Nphp1	Down
mmu-miR-3110-5p	UP	Nlrc4	Down
mmu-miR-409-5p	UP	Nit1	Down
mmu-miR-433-3p	UP	Nipsnap1	Down
mmu-miR-223-5p	UP	Neurog2	Down
mmu-miR-298-5p	UP	Neurl4	Down
mmu-miR-34b-5p	UP	Nat8f2	Down
mmu-miR-511-3p	UP	Nadsyn1	Down
mmu-miR-431-5p	UP	Nadsyn1	Down
mmu-miR-223-5p	UP	Myrfl	Down
mmu-miR-21a-3p	UP	Myom3	Down
mmu-miR-34b-3p	UP	Myh14	Down
mmu-miR-3110-5p	UP	Mtus1	Down
mmu-miR-344d-3p	UP	Mtif3	Down
mmu-miR-6994-3p	UP	Mtg2	Down
mmu-miR-511-5p	UP	Mtg2	Down
mmu-miR-376a-3p	UP	Mroh7	Down
mmu-miR-212-3p	UP	Mfsd4b3	Down
mmu-miR-369-3p	UP	Mfsd1	Down
mmu-miR-223-5p	UP	Mfap3l	Down
mmu-miR-431-5p	UP	Me1	Down
mmu-miR-223-5p	UP	Me1	Down
mmu-miR-132-3p	UP	Mdn1	Down
mmu-miR-5121	UP	Mdn1	Down
mmu-miR-369-3p	UP	Magi2	Down
mmu-miR-298-5p	UP	Maf	Down
mmu-miR-376a-3p	UP	Lyrm4	Down
mmu-miR-511-5p	UP	Lrtm1	Down
mmu-miR-410-3p	UP	Lrrk2	Down
mmu-miR-3071-3p	UP	Lrriq3	Down
mmu-miR-2137	UP	Lrrc8b	Down
mmu-miR-410-3p	UP	Lrrc55	Down
mmu-miR-124-5p	UP	Lrp2	Down
mmu-miR-182-3p	UP	Lpin1	Down
mmu-miR-21a-3p	UP	Lpin1	Down
mmu-miR-541-5p	UP	Lpin1	Down
mmu-miR-667-3p	UP	Lclat1	Down
mmu-miR-3071-3p	UP	Lace1	Down
mmu-miR-2137	UP	Klhl32	Down
mmu-miR-2137	UP	Kcp	Down
mmu-miR-212-5p	UP	Kcnt1	Down
mmu-miR-122-3p	UP	Kcnj3	Down
mmu-miR-223-5p	UP	Kcnj3	Down
mmu-miR-129-2-3p	UP	Kcnj15	Down
mmu-miR-5121	UP	Kcnj15	Down
mmu-miR-34b-5p	UP	Kcnc3	Down
mmu-miR-223-5p	UP	Itgae	Down
mmu-miR-34b-3p	UP	Iqsec2	Down
mmu-miR-132-3p	UP	Il12rb2	Down
mmu-miR-409-5p	UP	Ihh	Down
mmu-miR-5121	UP	Igfbp4	Down
mmu-miR-31-5p	UP	Hus1	Down
mmu-miR-31-5p	UP	Htt	Down
mmu-miR-212-3p	UP	Hps3	Down
mmu-miR-34b-3p	UP	Hmgcr	Down
mmu-miR-701-3p	UP	Hlf	Down
mmu-miR-21a-5p	UP	Hes2	Down
mmu-miR-154-3p	UP	Hao2	Down
mmu-miR-124-5p	UP	Habp2	Down
mmu-miR-344d-3p	UP	Habp2	Down
mmu-miR-667-3p	UP	Gucy2f	Down
mmu-miR-5121	UP	Gsap	Down
mmu-miR-21a-5p	UP	Grin3a	Down
mmu-miR-431-5p	UP	Grin3a	Down
mmu-miR-182-3p	UP	Gpr155	Down
mmu-miR-146b-5p	UP	Gpr137b-ps	Down
mmu-miR-146b-5p	UP	Gpr137b	Down
mmu-miR-122-3p	UP	Gpm6a	Down
mmu-miR-143-5p	UP	Gm6878	Down
mmu-miR-34b-3p	UP	Gm6300	Down
mmu-miR-511-3p	UP	Gm5424	Down
mmu-miR-5121	UP	Gm3716	Down
mmu-miR-206-3p	UP	Gm3716	Down
mmu-miR-344d-3p	UP	Gm16861	Down
mmu-miR-154-3p	UP	Gm16861	Down
mmu-miR-434-3p	UP	Gm15441	Down
mmu-miR-300-3p	UP	Gm15348	Down
mmu-miR-223-5p	UP	Gm11127	Down
mmu-miR-34c-3p	UP	Gm10787	Down
mmu-miR-494-3p	UP	Gm10732	Down
mmu-miR-3110-5p	UP	Glyctk	Down
mmu-miR-147-3p	UP	Glb1l2	Down
mmu-miR-125b-1-3p	UP	Glb1	Down
mmu-miR-299a-5p	UP	Glb1	Down
mmu-miR-147-3p	UP	Ggt1	Down
mmu-miR-431-5p	UP	Gfra1	Down
mmu-miR-212-3p	UP	Gfra1	Down
mmu-miR-541-5p	UP	Gfm2	Down
mmu-miR-132-3p	UP	Gcsh	Down
mmu-miR-434-3p	UP	Gcat	Down
mmu-miR-155-3p	UP	Gatsl2	Down
mmu-miR-701-3p	UP	Galnt1	Down
mmu-miR-147-3p	UP	Gabrb3	Down
mmu-miR-182-3p	UP	Fut8	Down
mmu-miR-132-3p	UP	Fn3k	Down
mmu-miR-212-3p	UP	Fn3k	Down
mmu-miR-494-3p	UP	Fmo2	Down
mmu-miR-129-2-3p	UP	Fam214a	Down
mmu-miR-369-3p	UP	Fam188b	Down
mmu-miR-5128	UP	Fam169b	Down
mmu-miR-344d-3p	UP	Fam126b	Down
mmu-miR-34b-3p	UP	Fam126b	Down
mmu-miR-3071-3p	UP	F5	Down
mmu-miR-124-3p	UP	Etv1	Down
mmu-miR-5121	UP	Esr1	Down
mmu-miR-376a-3p	UP	Esr1	Down
mmu-miR-299a-5p	UP	Erlin1	Down
mmu-miR-511-3p	UP	Erich6b	Down
mmu-miR-410-3p	UP	Erich6b	Down
mmu-miR-369-3p	UP	Erich6b	Down
mmu-miR-494-3p	UP	Erc2	Down
mmu-miR-496a-3p	UP	Eps8	Down
mmu-miR-21a-5p	UP	Ephx2	Down
mmu-miR-369-3p	UP	Entpd5	Down
mmu-miR-1193-3p	UP	Eml5	Down
mmu-miR-124-5p	UP	Elovl2	Down
mmu-miR-701-3p	UP	Egf	Down
mmu-miR-3071-3p	UP	E330009J07Rik	Down
mmu-miR-132-3p	UP	Dynll2	Down
mmu-miR-212-3p	UP	Dynll2	Down
mmu-miR-3071-3p	UP	Dusp9	Down
mmu-miR-667-3p	UP	Dock9	Down
mmu-miR-5121	UP	Dnajc28	Down
mmu-miR-466p-3p	UP	Dnajc19	Down
mmu-miR-206-3p	UP	Dnajc13	Down
mmu-miR-410-3p	UP	Dnah5	Down
mmu-miR-143-5p	UP	Dnah2	Down
mmu-miR-21a-3p	UP	Dnah2	Down
mmu-miR-154-3p	UP	Dmtn	Down
mmu-miR-212-3p	UP	Dlg2	Down
mmu-miR-3110-5p	UP	Dhrs4	Down
mmu-miR-369-3p	UP	Dhfr	Down
mmu-miR-21a-5p	UP	Dgkg	Down
mmu-miR-124-3p	UP	Dgat2	Down
mmu-miR-34b-5p	UP	Ddo	Down
mmu-miR-21a-5p	UP	D3Ertd751e	Down
mmu-miR-376a-3p	UP	D2hgdh	Down
mmu-miR-667-3p	UP	D130043K22Rik	Down
mmu-miR-344d-3p	UP	Cyp4f14	Down
mmu-miR-494-3p	UP	Csrnp3	Down
mmu-miR-410-3p	UP	Csrnp3	Down
mmu-miR-206-3p	UP	Csrnp3	Down
mmu-miR-147-3p	UP	Crocc	Down
mmu-miR-212-5p	UP	Crocc	Down
mmu-miR-433-3p	UP	Cpeb3	Down
mmu-miR-300-3p	UP	Cox15	Down
mmu-miR-21a-5p	UP	Col6a6	Down
mmu-miR-129-2-3p	UP	Col4a3	Down
mmu-miR-409-5p	UP	Cndp1	Down
mmu-miR-154-3p	UP	Cmbl	Down
mmu-miR-21a-3p	UP	Cluh	Down
mmu-miR-21a-5p	UP	Clic6	Down
mmu-miR-5121	UP	Clec2h	Down
mmu-miR-541-5p	UP	Cldn2	Down
mmu-miR-212-3p	UP	Clcn5	Down
mmu-miR-380-3p	UP	Clcn3	Down
mmu-miR-494-3p	UP	Chrna4	Down
mmu-miR-701-3p	UP	Chrna4	Down
mmu-miR-34c-3p	UP	Cfb	Down
mmu-miR-34b-3p	UP	Ces1e	Down
mmu-miR-344d-3p	UP	Ceacam2	Down
mmu-miR-182-3p	UP	Ceacam2	Down
mmu-miR-21a-3p	UP	Cdhr5	Down
mmu-miR-21a-3p	UP	Cd36	Down
mmu-miR-124-5p	UP	Ccdc171	Down
mmu-miR-34c-5p	UP	Ccdc170	Down
mmu-miR-125b-1-3p	UP	Ccdc151	Down
mmu-miR-3110-5p	UP	Ccdc108	Down
mmu-miR-21a-3p	UP	Ccdc107	Down
mmu-miR-34c-3p	UP	Car9	Down
mmu-miR-5128	UP	Car4	Down
mmu-miR-125b-1-3p	UP	Cadm1	Down
mmu-miR-6994-3p	UP	C8a	Down
mmu-miR-6994-3p	UP	Brap	Down
mmu-miR-380-3p	UP	Bnc2	Down
mmu-miR-299a-5p	UP	Bnc2	Down
mmu-miR-494-3p	UP	Bdnf	Down
mmu-miR-21a-5p	UP	BC024386	Down
mmu-miR-122-3p	UP	Bbs9	Down
mmu-miR-34c-5p	UP	Baiap3	Down
mmu-miR-155-3p	UP	B930092H01Rik	Down
mmu-miR-701-3p	UP	B4galt5	Down
mmu-miR-154-3p	UP	B4galt5	Down
mmu-miR-431-5p	UP	B3galt5	Down
mmu-miR-132-3p	UP	As3mt	Down
mmu-miR-129-2-3p	UP	Armc1	Down
mmu-miR-298-5p	UP	Arhgef39	Down
mmu-miR-124-3p	UP	Ar	Down
mmu-miR-5128	UP	Ar	Down
mmu-miR-380-3p	UP	Aqp11	Down
mmu-miR-34b-5p	UP	Apol7c	Down
mmu-miR-5128	UP	Aph1c	Down
mmu-miR-143-5p	UP	Ap5b1	Down
mmu-miR-431-5p	UP	Ap5b1	Down
mmu-miR-494-3p	UP	Anks1b	Down
mmu-miR-212-5p	UP	Ankrd33b	Down
mmu-miR-3110-5p	UP	Ankrd13c	Down
mmu-miR-2137	UP	Ankib1	Down
mmu-miR-541-5p	UP	Ankib1	Down
mmu-miR-369-3p	UP	Angptl7	Down
mmu-miR-7649-3p	UP	Amt	Down
mmu-miR-34c-3p	UP	Aldh7a1	Down
mmu-miR-212-3p	UP	Aldh7a1	Down
mmu-miR-223-5p	UP	Aldh5a1	Down
mmu-miR-541-5p	UP	Aldh16a1	Down
mmu-miR-1193-3p	UP	Airn	Down
mmu-miR-129-2-3p	UP	AI464131	Down
mmu-miR-31-5p	UP	AI464131	Down
mmu-miR-122-3p	UP	Agxt2	Down
mmu-miR-132-3p	UP	Agmat	Down
mmu-miR-212-3p	UP	Agmat	Down
mmu-miR-3071-3p	UP	Add3	Down
mmu-miR-122-3p	UP	Adcy9	Down
mmu-miR-146b-5p	UP	Adck3	Down
mmu-miR-434-3p	UP	Adap2	Down
mmu-miR-34b-3p	UP	Adamtsl3	Down
mmu-miR-154-3p	UP	Acvr2b	Down
mmu-miR-431-5p	UP	Actrt3	Down
mmu-miR-380-3p	UP	Acss3	Down
mmu-miR-212-5p	UP	Acp5	Down
mmu-miR-701-3p	UP	Acox3	Down
mmu-miR-34b-3p	UP	Acnat1	Down
mmu-miR-7649-3p	UP	Acmsd	Down
mmu-miR-3110-5p	UP	Acmsd	Down
mmu-miR-124-5p	UP	Ace2	Down
mmu-miR-212-3p	UP	Ace2	Down
mmu-miR-132-3p	UP	Acad11	Down
mmu-miR-155-3p	UP	Abhd18	Down
mmu-miR-34b-3p	UP	Abcg8	Down
mmu-miR-369-3p	UP	Abcg2	Down
mmu-miR-31-5p	UP	Abcc6	Down
mmu-miR-344d-3p	UP	Abcb6	Down
mmu-miR-129-2-3p	UP	Abca13	Down
mmu-miR-6994-3p	UP	Aacs	Down
mmu-miR-223-5p	UP	9030617O03Rik	Down
mmu-miR-300-3p	UP	9030617O03Rik	Down
mmu-miR-143-5p	UP	5830411N06Rik	Down
mmu-miR-155-3p	UP	4931408D14Rik	Down
mmu-miR-132-3p	UP	4931406C07Rik	Down
mmu-miR-344d-3p	UP	4930480K23Rik	Down
mmu-miR-3071-3p	UP	4930451G09Rik	Down
mmu-miR-3071-3p	UP	2500002B13Rik	Down
mmu-miR-409-5p	UP	1810034E14Rik	Down
mmu-miR-511-5p	UP	1700030J22Rik	Down
mmu-miR-365-2-5p	DOWN	Zfp575	Up
mmu-miR-1968-5p	DOWN	Zfp575	Up
mmu-miR-92a-2-5p	DOWN	Zfp57	Up
mmu-miR-547-3p	DOWN	Zfp385a	Up
mmu-miR-1948-3p	DOWN	Zfp185	Up
mmu-miR-3475-3p	DOWN	Zbtb42	Up
mmu-miR-187-5p	DOWN	Zak	Up
mmu-miR-7085-3p	DOWN	Ypel4	Up
mmu-miR-1968-5p	DOWN	Ypel2	Up
mmu-miR-122-5p	DOWN	Xirp2	Up
mmu-miR-122-5p	DOWN	Wfdc1	Up
mmu-miR-122-5p	DOWN	Vav3	Up
mmu-miR-1968-3p	DOWN	Unc13d	Up
mmu-miR-187-5p	DOWN	Unc13d	Up
mmu-miR-3073a-5p	DOWN	Ttc9	Up
mmu-miR-1948-3p	DOWN	Trp63	Up
mmu-miR-486b-3p	DOWN	Trp53i11	Up
mmu-miR-365-2-5p	DOWN	Trim72	Up
mmu-miR-1968-3p	DOWN	Trim72	Up
mmu-miR-7240-5p	DOWN	Trim6	Up
mmu-miR-92a-2-5p	DOWN	Trim6	Up
mmu-miR-7085-5p	DOWN	Treml2	Up
mmu-miR-3099-3p	DOWN	Tnfrsf9	Up
mmu-miR-365-2-5p	DOWN	Tmod2	Up
mmu-miR-7085-3p	DOWN	Tmem240	Up
mmu-miR-1968-5p	DOWN	Tmem158	Up
mmu-miR-1968-5p	DOWN	Tmem151b	Up
mmu-miR-466b-3p	DOWN	Tlr4	Up
mmu-miR-547-3p	DOWN	Tlr13	Up
mmu-miR-3073b-3p	DOWN	Tinagl1	Up
mmu-miR-3475-3p	DOWN	Themis2	Up
mmu-miR-346-5p	DOWN	Themis2	Up
mmu-miR-122-5p	DOWN	Tgif2	Up
mmu-miR-1948-5p	DOWN	Tes	Up
mmu-miR-1948-5p	DOWN	Tcirg1	Up
mmu-miR-7240-5p	DOWN	Tcf7l1	Up
mmu-miR-3073b-5p	DOWN	Tcf7l1	Up
mmu-miR-3073a-5p	DOWN	Tcf7l1	Up
mmu-miR-3099-3p	DOWN	Sytl2	Up
mmu-miR-7085-3p	DOWN	Syndig1	Up
mmu-miR-187-5p	DOWN	Syndig1	Up
mmu-miR-669c-5p	DOWN	Stx11	Up
mmu-miR-365-2-5p	DOWN	Stox2	Up
mmu-miR-1948-5p	DOWN	Stmn2	Up
mmu-miR-3073b-5p	DOWN	St6galnac4	Up
mmu-miR-7085-3p	DOWN	Specc1	Up
mmu-miR-346-5p	DOWN	Specc1	Up
mmu-miR-92a-2-5p	DOWN	Specc1	Up
mmu-miR-7240-5p	DOWN	Smurf1	Up
mmu-miR-190a-5p	DOWN	Smpdl3b	Up
mmu-miR-365-2-5p	DOWN	Slc9a5	Up
mmu-miR-1948-5p	DOWN	Slc7a11	Up
mmu-miR-122-5p	DOWN	Slc7a1	Up
mmu-miR-187-5p	DOWN	Slc7a1	Up
mmu-miR-1948-5p	DOWN	Slc34a2	Up
mmu-miR-190a-5p	DOWN	Slc2a10	Up
mmu-miR-190a-3p	DOWN	Slc2a1	Up
mmu-miR-190a-3p	DOWN	Slc27a6	Up
mmu-miR-7085-5p	DOWN	Slc22a15	Up
mmu-miR-92a-2-5p	DOWN	Slc16a3	Up
mmu-miR-122-5p	DOWN	Slc15a3	Up
mmu-miR-486a-5p	DOWN	Sirpb1b	Up
mmu-miR-190a-3p	DOWN	Shcbp1	Up
mmu-miR-92a-2-5p	DOWN	Shc2	Up
mmu-miR-187-3p	DOWN	Sh3pxd2a	Up
mmu-miR-499-5p	DOWN	Serpinh1	Up
mmu-miR-499-5p	DOWN	Sash3	Up
mmu-miR-3099-3p	DOWN	Samd4	Up
mmu-miR-346-5p	DOWN	Samd4	Up
mmu-miR-669c-5p	DOWN	Samd4	Up
mmu-miR-3073a-3p	DOWN	S100a13	Up
mmu-miR-7085-3p	DOWN	Rusc1	Up
mmu-miR-3073a-5p	DOWN	Rusc1	Up
mmu-miR-669o-3p	DOWN	Runx2	Up
mmu-let-7a-1-3p	DOWN	Rrm1	Up
mmu-miR-547-3p	DOWN	Ret	Up
mmu-miR-669c-5p	DOWN	Reep4	Up
mmu-miR-187-3p	DOWN	Rbms3	Up
mmu-miR-1948-3p	DOWN	Rbms3	Up
mmu-miR-7085-3p	DOWN	Rbfox3	Up
mmu-miR-3073b-5p	DOWN	Rbfox3	Up
mmu-miR-363-3p	DOWN	Rbfox2	Up
mmu-miR-92a-2-5p	DOWN	Rarg	Up
mmu-miR-547-3p	DOWN	Rarb	Up
mmu-miR-3099-3p	DOWN	Rad54b	Up
mmu-miR-547-3p	DOWN	Rab31	Up
mmu-miR-3073b-5p	DOWN	Rab27b	Up
mmu-miR-3073a-5p	DOWN	Rab27b	Up
mmu-miR-346-5p	DOWN	Qsox1	Up
mmu-miR-7240-5p	DOWN	Pwwp2b	Up
mmu-miR-1968-5p	DOWN	Pwwp2b	Up
mmu-miR-669o-3p	DOWN	Ptpre	Up
mmu-miR-669o-3p	DOWN	Ptpn18	Up
mmu-miR-486a-5p	DOWN	Psrc1	Up
mmu-miR-669c-5p	DOWN	Psd4	Up
mmu-miR-547-3p	DOWN	Psd3	Up
mmu-miR-1948-3p	DOWN	Psd3	Up
mmu-miR-486a-5p	DOWN	Prrx1	Up
mmu-miR-190a-3p	DOWN	Prrx1	Up
mmu-miR-7085-3p	DOWN	Prrt2	Up
mmu-miR-365-2-5p	DOWN	Prickle2	Up
mmu-miR-365-2-5p	DOWN	Pram1	Up
mmu-miR-1968-5p	DOWN	Pram1	Up
mmu-miR-92a-2-5p	DOWN	Ppp1r13l	Up
mmu-miR-190a-5p	DOWN	Pls3	Up
mmu-miR-92a-2-5p	DOWN	Plekhn1	Up
mmu-miR-187-3p	DOWN	Plekhg1	Up
mmu-miR-7240-5p	DOWN	Plekhg1	Up
mmu-miR-190a-3p	DOWN	Plek	Up
mmu-miR-486b-3p	DOWN	Pitpnm3	Up
mmu-let-7a-1-3p	DOWN	Pinx1	Up
mmu-miR-346-5p	DOWN	Pinlyp	Up
mmu-miR-466e-3p	DOWN	Pik3cd	Up
mmu-miR-486b-3p	DOWN	Pik3cd	Up
mmu-miR-466b-3p	DOWN	Pik3cd	Up
mmu-miR-92a-2-5p	DOWN	Pik3cd	Up
mmu-miR-466b-3p	DOWN	Pid1	Up
mmu-miR-3099-3p	DOWN	Penk	Up
mmu-miR-346-5p	DOWN	Pecam1	Up
mmu-miR-3073a-5p	DOWN	Pear1	Up
mmu-miR-187-3p	DOWN	Pdlim7	Up
mmu-miR-3073a-3p	DOWN	Pcdhgc3	Up
mmu-miR-669o-3p	DOWN	Pcdh19	Up
mmu-miR-1948-5p	DOWN	Parvg	Up
mmu-miR-122-5p	DOWN	Pakap	Up
mmu-miR-365-2-5p	DOWN	Pak6	Up
mmu-miR-486b-3p	DOWN	Pak6	Up
mmu-miR-190a-5p	DOWN	Pak3	Up
mmu-miR-1948-5p	DOWN	Pak3	Up
mmu-miR-1948-3p	DOWN	Orai2	Up
mmu-miR-190a-5p	DOWN	Olfml2b	Up
mmu-miR-3073b-3p	DOWN	Nusap1	Up
mmu-miR-3073a-3p	DOWN	Nupr1	Up
mmu-miR-7085-5p	DOWN	Ntrk2	Up
mmu-miR-1968-3p	DOWN	Nrp2	Up
mmu-miR-3073b-3p	DOWN	Nrp2	Up
mmu-miR-669c-5p	DOWN	Nrcam	Up
mmu-miR-7085-5p	DOWN	Npcd	Up
mmu-miR-92a-2-5p	DOWN	Npcd	Up
mmu-miR-486a-5p	DOWN	Nova2	Up
mmu-miR-92a-2-5p	DOWN	Nova2	Up
mmu-miR-669c-5p	DOWN	Nos3	Up
mmu-miR-187-3p	DOWN	Nnmt	Up
mmu-miR-7085-3p	DOWN	Nin	Up
mmu-miR-7240-5p	DOWN	Nin	Up
mmu-miR-365-2-5p	DOWN	Nckap5l	Up
mmu-miR-3099-3p	DOWN	Nckap5l	Up
mmu-miR-7085-5p	DOWN	Nckap5l	Up
mmu-let-7a-1-3p	DOWN	Ncam1	Up
mmu-miR-92a-2-5p	DOWN	Nat8l	Up
mmu-miR-499-5p	DOWN	Mybl1	Up
mmu-miR-190a-5p	DOWN	Mybl1	Up
mmu-miR-3475-3p	DOWN	Mtcl1	Up
mmu-miR-187-5p	DOWN	Mmp28	Up
mmu-miR-3073b-5p	DOWN	Mmp17	Up
mmu-miR-122-5p	DOWN	Mlkl	Up
mmu-miR-346-5p	DOWN	Mlf1	Up
mmu-miR-365-2-5p	DOWN	Mki67	Up
mmu-miR-92a-2-5p	DOWN	Mex3a	Up
mmu-miR-3073a-3p	DOWN	Medag	Up
mmu-miR-486b-3p	DOWN	Mbp	Up
mmu-miR-7085-5p	DOWN	Mbp	Up
mmu-miR-122-5p	DOWN	Mapkapk3	Up
mmu-miR-486b-3p	DOWN	Map6	Up
mmu-miR-3073b-3p	DOWN	Map3k9	Up
mmu-miR-1948-3p	DOWN	Man1c1	Up
mmu-miR-3073b-3p	DOWN	Mal	Up
mmu-miR-3475-3p	DOWN	Lrrc32	Up
mmu-miR-7240-5p	DOWN	Lrrc32	Up
mmu-miR-3073b-3p	DOWN	Loxl4	Up
mmu-miR-466e-3p	DOWN	Loxl3	Up
mmu-miR-466b-3p	DOWN	Loxl3	Up
mmu-miR-669c-5p	DOWN	Loxl2	Up
mmu-miR-363-3p	DOWN	Lox	Up
mmu-miR-499-5p	DOWN	Lmod1	Up
mmu-miR-7085-3p	DOWN	Lmna	Up
mmu-miR-3099-3p	DOWN	Lmna	Up
mmu-miR-486a-5p	DOWN	Liph	Up
mmu-miR-1948-5p	DOWN	Liph	Up
mmu-miR-3073a-5p	DOWN	Liph	Up
mmu-miR-7085-3p	DOWN	Lif	Up
mmu-miR-3475-3p	DOWN	Lif	Up
mmu-miR-7085-5p	DOWN	Lif	Up
mmu-miR-363-3p	DOWN	Leprot	Up
mmu-miR-363-3p	DOWN	Lepr	Up
mmu-miR-365-2-5p	DOWN	Ldb3	Up
mmu-miR-1948-3p	DOWN	Lamb2	Up
mmu-miR-3073b-5p	DOWN	Lamb2	Up
mmu-miR-1948-5p	DOWN	Lama5	Up
mmu-miR-1968-5p	DOWN	Krt83	Up
mmu-miR-365-2-5p	DOWN	Kntc1	Up
mmu-miR-486b-3p	DOWN	Klrg2	Up
mmu-miR-92a-2-5p	DOWN	Klrg2	Up
mmu-miR-1948-5p	DOWN	Klrg2	Up
mmu-miR-669c-5p	DOWN	Klf6	Up
mmu-miR-187-3p	DOWN	Klc3	Up
mmu-miR-187-5p	DOWN	Kif2c	Up
mmu-miR-7240-5p	DOWN	Kif1a	Up
mmu-miR-190a-3p	DOWN	Kctd4	Up
mmu-miR-122-5p	DOWN	Kcns3	Up
mmu-miR-1948-3p	DOWN	Jak3	Up
mmu-miR-365-2-5p	DOWN	Itpripl2	Up
mmu-miR-190a-3p	DOWN	Itgbl1	Up
mmu-miR-1968-3p	DOWN	Itgb4	Up
mmu-miR-3073a-3p	DOWN	Itga2	Up
mmu-miR-486a-5p	DOWN	Islr	Up
mmu-miR-7085-5p	DOWN	Il4ra	Up
mmu-miR-486b-3p	DOWN	Il20rb	Up
mmu-miR-3073b-5p	DOWN	Il10ra	Up
mmu-miR-466e-3p	DOWN	Igsf9b	Up
mmu-miR-466b-3p	DOWN	Igsf9b	Up
mmu-miR-92a-2-5p	DOWN	Igsf9b	Up
mmu-miR-1948-3p	DOWN	Icam1	Up
mmu-miR-7085-3p	DOWN	Htra3	Up
mmu-miR-363-3p	DOWN	Htr3a	Up
mmu-miR-7085-5p	DOWN	Hmga1	Up
mmu-miR-92a-2-5p	DOWN	Hmga1	Up
mmu-miR-3475-3p	DOWN	Hmcn1	Up
mmu-miR-92a-2-5p	DOWN	Hmcn1	Up
mmu-miR-92a-2-5p	DOWN	Hipk4	Up
mmu-miR-3475-3p	DOWN	Hhipl1	Up
mmu-miR-190a-3p	DOWN	Gzmm	Up
mmu-miR-3073a-5p	DOWN	Gvin1	Up
mmu-miR-466e-3p	DOWN	Gucy1b3	Up
mmu-miR-486a-5p	DOWN	Gucy1a2	Up
mmu-miR-1968-5p	DOWN	Grhl3	Up
mmu-miR-190a-5p	DOWN	Grhl1	Up
mmu-miR-187-5p	DOWN	Gpsm1	Up
mmu-miR-1948-5p	DOWN	Gpr173	Up
mmu-miR-365-2-5p	DOWN	Gpr161	Up
mmu-miR-122-5p	DOWN	Gpm6b	Up
mmu-miR-1968-3p	DOWN	Gpc6	Up
mmu-miR-1948-5p	DOWN	Gng2	Up
mmu-miR-669c-5p	DOWN	Gm14005	Up
mmu-miR-669c-5p	DOWN	Gli3	Up
mmu-let-7a-1-3p	DOWN	Gjc1	Up
mmu-let-7a-1-3p	DOWN	Gdf15	Up
mmu-miR-669o-3p	DOWN	Fzd2	Up
mmu-miR-669c-5p	DOWN	Fxyd1	Up
mmu-miR-499-5p	DOWN	Fscn2	Up
mmu-miR-499-5p	DOWN	Foxd2os	Up
mmu-miR-486a-5p	DOWN	Fndc1	Up
mmu-miR-7085-3p	DOWN	Flnc	Up
mmu-miR-365-2-5p	DOWN	Flnc	Up
mmu-miR-3073a-5p	DOWN	Flnc	Up
mmu-miR-190a-3p	DOWN	Flna	Up
mmu-miR-3073b-5p	DOWN	Fgfr2	Up
mmu-miR-365-2-5p	DOWN	Fbxw10	Up
mmu-miR-187-3p	DOWN	Fbn1	Up
mmu-miR-190a-3p	DOWN	Fbln2	Up
mmu-miR-3073a-3p	DOWN	Fbln2	Up
mmu-miR-3073b-3p	DOWN	Fbln2	Up
mmu-miR-7085-3p	DOWN	Fat3	Up
mmu-miR-190a-5p	DOWN	Fat3	Up
mmu-miR-1968-3p	DOWN	Fat1	Up
mmu-miR-3475-3p	DOWN	Fam83e	Up
mmu-miR-1968-5p	DOWN	Fam83e	Up
mmu-miR-1948-5p	DOWN	Fam110a	Up
mmu-let-7a-1-3p	DOWN	F3	Up
mmu-miR-1948-5p	DOWN	Evi2b	Up
mmu-miR-1968-3p	DOWN	Evi2a	Up
mmu-miR-1968-5p	DOWN	Espl1	Up
mmu-miR-499-5p	DOWN	Emilin1	Up
mmu-miR-365-2-5p	DOWN	Ehbp1l1	Up
mmu-miR-190a-5p	DOWN	Eda2r	Up
mmu-miR-363-3p	DOWN	Dysf	Up
mmu-miR-7085-3p	DOWN	Dusp5	Up
mmu-miR-3073b-3p	DOWN	Dusp5	Up
mmu-miR-486b-3p	DOWN	Dscaml1	Up
mmu-miR-3099-3p	DOWN	Dpysl3	Up
mmu-miR-486a-5p	DOWN	Dpcr1	Up
mmu-miR-7085-3p	DOWN	Dpcr1	Up
mmu-miR-669o-3p	DOWN	Dnmt3l	Up
mmu-miR-190a-5p	DOWN	Dnmt3b	Up
mmu-miR-92a-2-5p	DOWN	Dnaaf3	Up
mmu-miR-547-3p	DOWN	Dmkn	Up
mmu-miR-1948-5p	DOWN	Dkk3	Up
mmu-miR-190a-5p	DOWN	Dctd	Up
mmu-miR-7085-3p	DOWN	Dbndd2	Up
mmu-miR-3073b-3p	DOWN	Dact3	Up
mmu-miR-122-5p	DOWN	Cxcl3	Up
mmu-let-7a-1-3p	DOWN	Ctsc	Up
mmu-miR-499-5p	DOWN	Csf1	Up
mmu-miR-7240-5p	DOWN	Csf1	Up
mmu-miR-3073b-3p	DOWN	Crybb3	Up
mmu-miR-187-5p	DOWN	Cp	Up
mmu-miR-669o-3p	DOWN	Col8a2	Up
mmu-miR-363-3p	DOWN	Col4a1	Up
mmu-miR-3475-3p	DOWN	Col18a1	Up
mmu-miR-3099-3p	DOWN	Col18a1	Up
mmu-miR-190a-5p	DOWN	Cntn1	Up
mmu-miR-1948-5p	DOWN	Cntn1	Up
mmu-let-7a-1-3p	DOWN	Cnn1	Up
mmu-miR-499-5p	DOWN	Clec4a2	Up
mmu-miR-499-5p	DOWN	Cldn7	Up
mmu-miR-1948-3p	DOWN	Cldn19	Up
mmu-miR-187-3p	DOWN	Clca3a1	Up
mmu-miR-122-5p	DOWN	Cilp	Up
mmu-miR-466e-3p	DOWN	Chek1	Up
mmu-miR-466b-3p	DOWN	Chek1	Up
mmu-miR-3073b-3p	DOWN	Cers3	Up
mmu-miR-1968-3p	DOWN	Cdsn	Up
mmu-miR-7240-5p	DOWN	Cdca2	Up
mmu-miR-187-5p	DOWN	Cbln2	Up
mmu-miR-499-5p	DOWN	Cav2	Up
mmu-miR-7240-5p	DOWN	Catip	Up
mmu-miR-1968-5p	DOWN	Catip	Up
mmu-miR-122-5p	DOWN	Camk2d	Up
mmu-miR-363-3p	DOWN	Camk2a	Up
mmu-miR-486b-3p	DOWN	C77080	Up
mmu-miR-3073b-3p	DOWN	C1qtnf5	Up
mmu-miR-346-5p	DOWN	Brsk1	Up
mmu-miR-363-3p	DOWN	Bmf	Up
mmu-miR-187-3p	DOWN	Blnk	Up
mmu-miR-3073b-3p	DOWN	Bcas1	Up
mmu-miR-466e-3p	DOWN	B3galt1	Up
mmu-miR-466b-3p	DOWN	B3galt1	Up
mmu-miR-3475-3p	DOWN	Atp8b2	Up
mmu-miR-499-5p	DOWN	Atp8b1	Up
mmu-miR-1968-3p	DOWN	Atp8b1	Up
mmu-miR-669c-5p	DOWN	Aspm	Up
mmu-miR-190a-3p	DOWN	Arid5a	Up
mmu-let-7a-1-3p	DOWN	Arhgap25	Up
mmu-miR-1948-5p	DOWN	Anxa5	Up
mmu-miR-669c-5p	DOWN	Ankle1	Up
mmu-miR-187-3p	DOWN	Angptl8	Up
mmu-miR-7085-3p	DOWN	Angptl8	Up
mmu-miR-1948-3p	DOWN	Ahnak	Up
mmu-miR-7240-5p	DOWN	Agap2	Up
mmu-miR-1968-5p	DOWN	Agap2	Up
mmu-miR-669c-5p	DOWN	Agap2	Up
mmu-miR-92a-2-5p	DOWN	Agap2	Up
mmu-miR-3073a-5p	DOWN	Adora1	Up
mmu-miR-365-2-5p	DOWN	Adgrg6	Up
mmu-miR-1968-5p	DOWN	Adgrg6	Up
mmu-miR-363-3p	DOWN	Adgrg2	Up
mmu-miR-7085-5p	DOWN	Adgrf3	Up
mmu-miR-3073a-5p	DOWN	Adgrd1	Up
mmu-miR-92a-2-5p	DOWN	Adamts7	Up
mmu-miR-466e-3p	DOWN	Adamts4	Up
mmu-miR-3073a-5p	DOWN	Adamts14	Up
mmu-miR-190a-3p	DOWN	Adamts10	Up
mmu-miR-190a-3p	DOWN	Adam23	Up
mmu-miR-1948-5p	DOWN	Adam19	Up
mmu-miR-187-5p	DOWN	Adam12	Up
mmu-miR-346-5p	DOWN	Acsl4	Up
mmu-miR-190a-3p	DOWN	A430105I19Rik	Up
mmu-miR-466e-3p	DOWN	6030408B16Rik	Up
mmu-miR-466b-3p	DOWN	6030408B16Rik	Up
mmu-miR-1948-5p	DOWN	4930447K03Rik	Up
mmu-miR-1948-3p	DOWN	4833428L15Rik	Up
mmu-miR-363-3p	DOWN	Znrf2	Down
mmu-miR-1968-5p	DOWN	Zmynd12	Down
mmu-miR-363-3p	DOWN	Yars2	Down
mmu-miR-3073b-3p	DOWN	Xylb	Down
mmu-miR-190a-3p	DOWN	Xpnpep3	Down
mmu-miR-547-3p	DOWN	Wnk2	Down
mmu-miR-187-3p	DOWN	Wnk2	Down
mmu-miR-346-5p	DOWN	Whrn	Down
mmu-miR-1968-5p	DOWN	Whrn	Down
mmu-miR-7085-5p	DOWN	Whrn	Down
mmu-miR-669c-5p	DOWN	Wdpcp	Down
mmu-miR-187-3p	DOWN	Vegfa	Down
mmu-miR-346-5p	DOWN	Vegfa	Down
mmu-miR-92a-2-5p	DOWN	Vegfa	Down
mmu-miR-669o-3p	DOWN	Unc5c	Down
mmu-miR-122-5p	DOWN	Ugt8a	Down
mmu-miR-669c-5p	DOWN	Ubxn10	Down
mmu-let-7a-1-3p	DOWN	Ttc41	Down
mmu-miR-1968-5p	DOWN	Ttc38	Down
mmu-miR-3073a-5p	DOWN	Tsku	Down
mmu-miR-547-3p	DOWN	Trps1	Down
mmu-miR-190a-3p	DOWN	Trappc9	Down
mmu-miR-466e-3p	DOWN	Tpte	Down
mmu-miR-466e-3p	DOWN	Tnfrsf21	Down
mmu-miR-1948-3p	DOWN	Tmem56	Down
mmu-miR-669o-3p	DOWN	Tmem237	Down
mmu-miR-3475-3p	DOWN	Tmem176a	Down
mmu-miR-122-5p	DOWN	Tmem175	Down
mmu-miR-466e-3p	DOWN	Tmem108	Down
mmu-miR-1968-3p	DOWN	Tln2	Down
mmu-miR-669o-3p	DOWN	Timp3	Down
mmu-miR-486a-5p	DOWN	Thrb	Down
mmu-miR-1968-5p	DOWN	Tcaim	Down
mmu-miR-92a-2-5p	DOWN	Tcaim	Down
mmu-miR-187-5p	DOWN	Tbx10	Down
mmu-miR-669o-3p	DOWN	Tbc1d16	Down
mmu-miR-122-5p	DOWN	Tbc1d16	Down
mmu-miR-466e-3p	DOWN	Tbc1d13	Down
mmu-miR-466b-3p	DOWN	Tbc1d13	Down
mmu-miR-547-3p	DOWN	Syt7	Down
mmu-miR-499-5p	DOWN	Syt1	Down
mmu-miR-3073a-3p	DOWN	Stxbp5l	Down
mmu-miR-1968-5p	DOWN	Spry3	Down
mmu-miR-190a-5p	DOWN	Snx7	Down
mmu-miR-190a-5p	DOWN	Slco1a4	Down
mmu-miR-3073b-3p	DOWN	Slc9a2	Down
mmu-miR-190a-3p	DOWN	Slc6a20b	Down
mmu-miR-1968-3p	DOWN	Slc6a18	Down
mmu-miR-499-5p	DOWN	Slc5a8	Down
mmu-miR-486a-5p	DOWN	Slc5a12	Down
mmu-miR-187-3p	DOWN	Slc5a10	Down
mmu-miR-3475-3p	DOWN	Slc5a10	Down
mmu-miR-122-5p	DOWN	Slc41a2	Down
mmu-miR-190a-5p	DOWN	Slc35a3	Down
mmu-miR-669c-5p	DOWN	Slc33a1	Down
mmu-miR-1948-3p	DOWN	Slc2a2	Down
mmu-miR-7085-3p	DOWN	Slc28a1	Down
mmu-miR-7240-5p	DOWN	Slc28a1	Down
mmu-miR-346-5p	DOWN	Slc28a1	Down
mmu-miR-1968-5p	DOWN	Slc28a1	Down
mmu-miR-92a-2-5p	DOWN	Slc25a42	Down
mmu-miR-7085-3p	DOWN	Slc25a34	Down
mmu-miR-122-5p	DOWN	Slc25a34	Down
mmu-miR-3073a-5p	DOWN	Slc25a34	Down
mmu-miR-3073a-5p	DOWN	Slc22a28	Down
mmu-miR-669c-5p	DOWN	Slc22a27	Down
mmu-miR-1968-3p	DOWN	Slc22a23	Down
mmu-miR-1968-5p	DOWN	Slc22a23	Down
mmu-miR-486b-3p	DOWN	Slc22a18	Down
mmu-miR-669o-3p	DOWN	Slc22a13	Down
mmu-miR-187-3p	DOWN	Slc1a2	Down
mmu-miR-486b-3p	DOWN	Slc13a5	Down
mmu-miR-190a-3p	DOWN	Slc12a7	Down
mmu-miR-7085-3p	DOWN	Shf	Down
mmu-miR-3073b-5p	DOWN	Sema4g	Down
mmu-miR-187-3p	DOWN	Sec24a	Down
mmu-miR-346-5p	DOWN	Sec14l3	Down
mmu-miR-486b-3p	DOWN	Rreb1	Down
mmu-miR-92a-2-5p	DOWN	Rreb1	Down
mmu-miR-7240-5p	DOWN	Rpusd3	Down
mmu-miR-1968-3p	DOWN	Rmdn3	Down
mmu-miR-499-5p	DOWN	Rims2	Down
mmu-miR-466b-3p	DOWN	Rgl1	Down
mmu-let-7a-1-3p	DOWN	Rdh7	Down
mmu-miR-122-5p	DOWN	Ralgapa2	Down
mmu-miR-486b-3p	DOWN	Rab3ip	Down
mmu-miR-669o-3p	DOWN	Pth1r	Down
mmu-miR-486b-3p	DOWN	Pth1r	Down
mmu-miR-3073b-5p	DOWN	Pth1r	Down
mmu-miR-1968-3p	DOWN	Prss53	Down
mmu-miR-669c-5p	DOWN	Prss36	Down
mmu-miR-190a-3p	DOWN	Prodh2	Down
mmu-miR-363-3p	DOWN	Ppp1r16b	Down
mmu-miR-486a-5p	DOWN	Ppara	Down
mmu-miR-365-2-5p	DOWN	Ppara	Down
mmu-miR-1948-5p	DOWN	Polr3e	Down
mmu-miR-3073b-3p	DOWN	Poli	Down
mmu-miR-7240-5p	DOWN	Pnkd	Down
mmu-miR-7085-5p	DOWN	Pnkd	Down
mmu-miR-547-3p	DOWN	Plk5	Down
mmu-miR-3073b-3p	DOWN	Plekha6	Down
mmu-miR-1968-5p	DOWN	Pi4ka	Down
mmu-miR-3475-3p	DOWN	Pex10	Down
mmu-miR-486a-5p	DOWN	Pdzd2	Down
mmu-miR-3073b-3p	DOWN	Pdp2	Down
mmu-miR-365-2-5p	DOWN	Pcdh17	Down
mmu-miR-669c-5p	DOWN	Pank3	Down
mmu-miR-190a-5p	DOWN	P4ha1	Down
mmu-miR-1968-5p	DOWN	Osbpl8	Down
mmu-miR-466e-3p	DOWN	Oas3	Down
mmu-miR-1968-3p	DOWN	Nlrc4	Down
mmu-miR-669o-3p	DOWN	Neurl4	Down
mmu-miR-3475-3p	DOWN	Neurl4	Down
mmu-miR-3073b-5p	DOWN	Neu1	Down
mmu-miR-7240-5p	DOWN	Ndufv3	Down
mmu-miR-499-5p	DOWN	Ndufs1	Down
mmu-miR-365-2-5p	DOWN	Nccrp1	Down
mmu-miR-486b-3p	DOWN	Nat8f3	Down
mmu-miR-499-5p	DOWN	Nat8f2	Down
mmu-miR-122-5p	DOWN	Nap1l5	Down
mmu-miR-346-5p	DOWN	Nadk2	Down
mmu-miR-92a-2-5p	DOWN	Mtus1	Down
mmu-miR-547-3p	DOWN	Mrpl50	Down
mmu-miR-1948-3p	DOWN	Mocos	Down
mmu-miR-466e-3p	DOWN	Mgat3	Down
mmu-miR-466e-3p	DOWN	Mfsd2a	Down
mmu-miR-365-2-5p	DOWN	Mettl8	Down
mmu-miR-7085-3p	DOWN	Methig1	Down
mmu-miR-486a-5p	DOWN	Med14	Down
mmu-miR-346-5p	DOWN	Med14	Down
mmu-miR-187-5p	DOWN	Me1	Down
mmu-miR-669c-5p	DOWN	Me1	Down
mmu-miR-3073b-5p	DOWN	Masp2	Down
mmu-miR-3073a-5p	DOWN	Masp2	Down
mmu-miR-365-2-5p	DOWN	Mapt	Down
mmu-miR-7240-5p	DOWN	Mapt	Down
mmu-miR-3099-3p	DOWN	Mapt	Down
mmu-miR-187-5p	DOWN	Mapt	Down
mmu-miR-486a-5p	DOWN	Magi2	Down
mmu-miR-187-3p	DOWN	Maf	Down
mmu-miR-486b-3p	DOWN	Lrrc55	Down
mmu-miR-190a-5p	DOWN	Lrrc19	Down
mmu-miR-3073a-5p	DOWN	Lrp2	Down
mmu-miR-547-3p	DOWN	Lonp2	Down
mmu-miR-190a-5p	DOWN	Lmln	Down
mmu-miR-1948-3p	DOWN	Lipa	Down
mmu-miR-122-5p	DOWN	Lama1	Down
mmu-miR-346-5p	DOWN	Klhl32	Down
mmu-miR-3475-3p	DOWN	Kcp	Down
mmu-miR-363-3p	DOWN	Kcnt1	Down
mmu-miR-3073b-5p	DOWN	Kcnj8	Down
mmu-miR-7085-5p	DOWN	Kcnj15	Down
mmu-miR-3073b-5p	DOWN	Itgae	Down
mmu-miR-7085-5p	DOWN	Iqsec2	Down
mmu-miR-92a-2-5p	DOWN	Iqsec2	Down
mmu-let-7a-1-3p	DOWN	Insc	Down
mmu-let-7a-1-3p	DOWN	Iba57	Down
mmu-miR-3099-3p	DOWN	Hps5	Down
mmu-miR-547-3p	DOWN	Homer1	Down
mmu-miR-363-3p	DOWN	Hnf1a	Down
mmu-miR-1948-5p	DOWN	Herc3	Down
mmu-miR-7085-3p	DOWN	Henmt1	Down
mmu-miR-363-3p	DOWN	Henmt1	Down
mmu-miR-365-2-5p	DOWN	Gtf2i	Down
mmu-miR-669c-5p	DOWN	Grtp1	Down
mmu-miR-190a-5p	DOWN	Gorasp1	Down
mmu-miR-7085-5p	DOWN	Gm853	Down
mmu-miR-7085-5p	DOWN	Glyctk	Down
mmu-miR-3073a-3p	DOWN	Ghitm	Down
mmu-miR-187-3p	DOWN	Fnip2	Down
mmu-miR-3073a-5p	DOWN	Fn3k	Down
mmu-miR-122-5p	DOWN	Fmo2	Down
mmu-miR-499-5p	DOWN	Fhl1	Down
mmu-miR-1968-3p	DOWN	Fhl1	Down
mmu-miR-346-5p	DOWN	Fbxo40	Down
mmu-miR-92a-2-5p	DOWN	Fbxo10	Down
mmu-miR-3073b-3p	DOWN	Fam8a1	Down
mmu-miR-669c-5p	DOWN	Fads3	Down
mmu-miR-1948-3p	DOWN	Esr1	Down
mmu-miR-669o-3p	DOWN	Erlin1	Down
mmu-miR-363-3p	DOWN	Erlin1	Down
mmu-miR-346-5p	DOWN	Erich4	Down
mmu-miR-187-5p	DOWN	Entpd5	Down
mmu-miR-1968-3p	DOWN	Eml5	Down
mmu-miR-3073a-5p	DOWN	Eml5	Down
mmu-miR-190a-5p	DOWN	Dusp9	Down
mmu-miR-466b-3p	DOWN	Dnajc19	Down
mmu-miR-3475-3p	DOWN	Dnah9	Down
mmu-miR-363-3p	DOWN	Dnah5	Down
mmu-miR-365-2-5p	DOWN	Dnah2	Down
mmu-miR-1948-3p	DOWN	Depdc1b	Down
mmu-miR-547-3p	DOWN	Degs2	Down
mmu-miR-499-5p	DOWN	Def8	Down
mmu-miR-547-3p	DOWN	Dcst1	Down
mmu-miR-499-5p	DOWN	D630023F18Rik	Down
mmu-miR-547-3p	DOWN	D3Ertd751e	Down
mmu-miR-1968-5p	DOWN	Cyp2c44	Down
mmu-miR-486a-5p	DOWN	Cym	Down
mmu-miR-187-5p	DOWN	Csrnp3	Down
mmu-miR-669c-5p	DOWN	Coq9	Down
mmu-miR-486a-5p	DOWN	Col6a6	Down
mmu-miR-3073b-5p	DOWN	Col6a6	Down
mmu-miR-3073a-5p	DOWN	Col6a6	Down
mmu-miR-3073a-5p	DOWN	Cntnap5a	Down
mmu-miR-3073b-3p	DOWN	Cnnm2	Down
mmu-miR-3099-3p	DOWN	Cmah	Down
mmu-miR-187-5p	DOWN	Cluh	Down
mmu-miR-187-5p	DOWN	Clcn5	Down
mmu-miR-190a-5p	DOWN	Clcn3	Down
mmu-miR-1948-5p	DOWN	Cgref1	Down
mmu-miR-486a-5p	DOWN	Cfap70	Down
mmu-miR-187-5p	DOWN	Ceacam2	Down
mmu-miR-3073b-5p	DOWN	Cdhr2	Down
mmu-miR-3073a-5p	DOWN	Cdhr2	Down
mmu-miR-1968-3p	DOWN	Cd6	Down
mmu-miR-190a-3p	DOWN	Ccdc6	Down
mmu-miR-1968-3p	DOWN	Ccdc171	Down
mmu-miR-3073a-3p	DOWN	Ccdc171	Down
mmu-miR-3073b-5p	DOWN	Cadm1	Down
mmu-miR-669c-5p	DOWN	C8a	Down
mmu-miR-1948-3p	DOWN	C330021F23Rik	Down
mmu-miR-1948-5p	DOWN	C1qtnf3	Down
mmu-let-7a-1-3p	DOWN	Bdnf	Down
mmu-miR-365-2-5p	DOWN	Bdnf	Down
mmu-miR-499-5p	DOWN	Bcl11b	Down
mmu-miR-363-3p	DOWN	Bcl11b	Down
mmu-miR-346-5p	DOWN	Bcat1	Down
mmu-miR-1968-5p	DOWN	Bcat1	Down
mmu-miR-3073a-5p	DOWN	Bcat1	Down
mmu-miR-486a-5p	DOWN	B3galt5	Down
mmu-miR-3475-3p	DOWN	B3galt5	Down
mmu-miR-190a-5p	DOWN	Atp11a	Down
mmu-miR-3073a-3p	DOWN	Aspdh	Down
mmu-miR-1968-5p	DOWN	Asap3	Down
mmu-miR-7085-5p	DOWN	Arhgef39	Down
mmu-miR-3073a-3p	DOWN	Aph1c	Down
mmu-miR-7085-5p	DOWN	Ap5b1	Down
mmu-let-7a-1-3p	DOWN	Ano4	Down
mmu-miR-122-5p	DOWN	Anks1b	Down
mmu-miR-3099-3p	DOWN	Ankib1	Down
mmu-miR-3073b-3p	DOWN	Als2	Down
mmu-miR-190a-5p	DOWN	Alk	Down
mmu-miR-187-5p	DOWN	Ahcyl2	Down
mmu-miR-547-3p	DOWN	Agps	Down
mmu-miR-190a-3p	DOWN	Acy3	Down
mmu-miR-1948-5p	DOWN	Acsm2	Down
mmu-miR-190a-3p	DOWN	Acot6	Down
mmu-miR-466e-3p	DOWN	Acot11	Down
mmu-miR-190a-3p	DOWN	Ace2	Down
mmu-miR-3475-3p	DOWN	Abca3	Down
mmu-miR-3099-3p	DOWN	Abca3	Down
mmu-miR-486a-5p	DOWN	5830411N06Rik	Down
mmu-miR-1948-3p	DOWN	5430402O13Rik	Down
mmu-miR-7240-5p	DOWN	2810459M11Rik	Down
mmu-miR-7085-3p	DOWN	2610507B11Rik	Down
mmu-miR-3073a-3p	DOWN	1110008L16Rik	Down
mmu-miR-363-3p	DOWN	2018-03-08	Down
mmu-miR-1948-5p	DOWN	2018-03-08	Down

## Sheet: 767 opposite regulatory pairs 
Data S2.
miRNA id	Up/down regulation	Symbol	Up/Down Regulation
mmu-miR-124-5p	UP	Rbm47	Down
mmu-miR-124-5p	UP	Pm20d1	Down
mmu-miR-124-5p	UP	Lrp2	Down
mmu-miR-124-5p	UP	Habp2	Down
mmu-miR-124-5p	UP	Elovl2	Down
mmu-miR-124-5p	UP	Ccdc171	Down
mmu-miR-124-5p	UP	Ace2	Down
mmu-miR-122-3p	UP	Wwp1	Down
mmu-miR-122-3p	UP	Uqcc1	Down
mmu-miR-122-3p	UP	Timm9	Down
mmu-miR-122-3p	UP	Kcnj3	Down
mmu-miR-122-3p	UP	Gpm6a	Down
mmu-miR-122-3p	UP	Bbs9	Down
mmu-miR-122-3p	UP	Agxt2	Down
mmu-miR-122-3p	UP	Adcy9	Down
mmu-miR-124-3p	UP	Rgl1	Down
mmu-miR-124-3p	UP	Pecr	Down
mmu-miR-124-3p	UP	Npm3	Down
mmu-miR-124-3p	UP	Etv1	Down
mmu-miR-124-3p	UP	Dgat2	Down
mmu-miR-124-3p	UP	Ar	Down
mmu-miR-344d-3p	UP	Tmem64	Down
mmu-miR-344d-3p	UP	Tmem229a	Down
mmu-miR-344d-3p	UP	Osbpl6	Down
mmu-miR-344d-3p	UP	Mtif3	Down
mmu-miR-344d-3p	UP	Habp2	Down
mmu-miR-344d-3p	UP	Gm16861	Down
mmu-miR-344d-3p	UP	Fam126b	Down
mmu-miR-344d-3p	UP	Cyp4f14	Down
mmu-miR-344d-3p	UP	Ceacam2	Down
mmu-miR-344d-3p	UP	Abcb6	Down
mmu-miR-344d-3p	UP	4930480K23Rik	Down
mmu-miR-409-5p	UP	Uqcc1	Down
mmu-miR-409-5p	UP	Tmem176a	Down
mmu-miR-409-5p	UP	Pdk3	Down
mmu-miR-409-5p	UP	Nit1	Down
mmu-miR-409-5p	UP	Ihh	Down
mmu-miR-409-5p	UP	Cndp1	Down
mmu-miR-409-5p	UP	1810034E14Rik	Down
mmu-miR-129-2-3p	UP	Zfp93	Down
mmu-miR-129-2-3p	UP	Vwa8	Down
mmu-miR-129-2-3p	UP	Tsga10	Down
mmu-miR-129-2-3p	UP	Sypl2	Down
mmu-miR-129-2-3p	UP	Sptlc3	Down
mmu-miR-129-2-3p	UP	Pvalb	Down
mmu-miR-129-2-3p	UP	Osbp2	Down
mmu-miR-129-2-3p	UP	Kcnj15	Down
mmu-miR-129-2-3p	UP	Fam214a	Down
mmu-miR-129-2-3p	UP	Col4a3	Down
mmu-miR-129-2-3p	UP	Armc1	Down
mmu-miR-129-2-3p	UP	AI464131	Down
mmu-miR-129-2-3p	UP	Abca13	Down
mmu-miR-496a-3p	UP	Zswim5	Down
mmu-miR-496a-3p	UP	Vwce	Down
mmu-miR-496a-3p	UP	Eps8	Down
mmu-miR-147-3p	UP	Shc3	Down
mmu-miR-147-3p	UP	Rbpms2	Down
mmu-miR-147-3p	UP	Glb1l2	Down
mmu-miR-147-3p	UP	Ggt1	Down
mmu-miR-147-3p	UP	Gabrb3	Down
mmu-miR-147-3p	UP	Crocc	Down
mmu-miR-5128	UP	Zmynd12	Down
mmu-miR-5128	UP	Tspan13	Down
mmu-miR-5128	UP	Fam169b	Down
mmu-miR-5128	UP	Car4	Down
mmu-miR-5128	UP	Ar	Down
mmu-miR-5128	UP	Aph1c	Down
mmu-miR-7649-3p	UP	Ralgapa2	Down
mmu-miR-7649-3p	UP	Amt	Down
mmu-miR-7649-3p	UP	Acmsd	Down
mmu-miR-21a-5p	UP	Whrn	Down
mmu-miR-21a-5p	UP	Wdr78	Down
mmu-miR-21a-5p	UP	Syt14	Down
mmu-miR-21a-5p	UP	Plekha8	Down
mmu-miR-21a-5p	UP	Osgepl1	Down
mmu-miR-21a-5p	UP	Hes2	Down
mmu-miR-21a-5p	UP	Grin3a	Down
mmu-miR-21a-5p	UP	Ephx2	Down
mmu-miR-21a-5p	UP	Dgkg	Down
mmu-miR-21a-5p	UP	D3Ertd751e	Down
mmu-miR-21a-5p	UP	Col6a6	Down
mmu-miR-21a-5p	UP	Clic6	Down
mmu-miR-21a-5p	UP	BC024386	Down
mmu-miR-212-5p	UP	Stra6	Down
mmu-miR-212-5p	UP	Pi4ka	Down
mmu-miR-212-5p	UP	Kcnt1	Down
mmu-miR-212-5p	UP	Crocc	Down
mmu-miR-212-5p	UP	Ankrd33b	Down
mmu-miR-212-5p	UP	Acp5	Down
mmu-miR-132-3p	UP	Stxbp5l	Down
mmu-miR-132-3p	UP	Slc34a3	Down
mmu-miR-132-3p	UP	Sez6l	Down
mmu-miR-132-3p	UP	Sema5b	Down
mmu-miR-132-3p	UP	Rmdn3	Down
mmu-miR-132-3p	UP	P2rx3	Down
mmu-miR-132-3p	UP	Mdn1	Down
mmu-miR-132-3p	UP	Il12rb2	Down
mmu-miR-132-3p	UP	Gcsh	Down
mmu-miR-132-3p	UP	Fn3k	Down
mmu-miR-132-3p	UP	Dynll2	Down
mmu-miR-132-3p	UP	As3mt	Down
mmu-miR-132-3p	UP	Agmat	Down
mmu-miR-132-3p	UP	Acad11	Down
mmu-miR-132-3p	UP	4931406C07Rik	Down
mmu-miR-34c-5p	UP	Trappc9	Down
mmu-miR-34c-5p	UP	Snx7	Down
mmu-miR-34c-5p	UP	Sepp1	Down
mmu-miR-34c-5p	UP	Ccdc170	Down
mmu-miR-34c-5p	UP	Baiap3	Down
mmu-miR-146b-5p	UP	Tanc2	Down
mmu-miR-146b-5p	UP	Slc4a9	Down
mmu-miR-146b-5p	UP	Slc44a4	Down
mmu-miR-146b-5p	UP	Rhov	Down
mmu-miR-146b-5p	UP	Pgm2	Down
mmu-miR-146b-5p	UP	Gpr137b-ps	Down
mmu-miR-146b-5p	UP	Gpr137b	Down
mmu-miR-146b-5p	UP	Adck3	Down
mmu-miR-5121	UP	Trmt2b	Down
mmu-miR-5121	UP	Sardh	Down
mmu-miR-5121	UP	Pcyt2	Down
mmu-miR-5121	UP	Mdn1	Down
mmu-miR-5121	UP	Kcnj15	Down
mmu-miR-5121	UP	Igfbp4	Down
mmu-miR-5121	UP	Gsap	Down
mmu-miR-5121	UP	Gm3716	Down
mmu-miR-5121	UP	Esr1	Down
mmu-miR-5121	UP	Dnajc28	Down
mmu-miR-5121	UP	Clec2h	Down
mmu-miR-376a-3p	UP	Trpv4	Down
mmu-miR-376a-3p	UP	Slco3a1	Down
mmu-miR-376a-3p	UP	Slc22a30	Down
mmu-miR-376a-3p	UP	Pcx	Down
mmu-miR-376a-3p	UP	Mroh7	Down
mmu-miR-376a-3p	UP	Lyrm4	Down
mmu-miR-376a-3p	UP	Esr1	Down
mmu-miR-376a-3p	UP	D2hgdh	Down
mmu-miR-494-3p	UP	Uhmk1	Down
mmu-miR-494-3p	UP	Trappc9	Down
mmu-miR-494-3p	UP	Tmtc4	Down
mmu-miR-494-3p	UP	Tmem174	Down
mmu-miR-494-3p	UP	Slco1a4	Down
mmu-miR-494-3p	UP	Gm10732	Down
mmu-miR-494-3p	UP	Fmo2	Down
mmu-miR-494-3p	UP	Erc2	Down
mmu-miR-494-3p	UP	Csrnp3	Down
mmu-miR-494-3p	UP	Chrna4	Down
mmu-miR-494-3p	UP	Bdnf	Down
mmu-miR-494-3p	UP	Anks1b	Down
mmu-miR-125b-1-3p	UP	Paqr9	Down
mmu-miR-125b-1-3p	UP	Glb1	Down
mmu-miR-125b-1-3p	UP	Ccdc151	Down
mmu-miR-125b-1-3p	UP	Cadm1	Down
mmu-miR-34c-3p	UP	Ralgps2	Down
mmu-miR-34c-3p	UP	Gm10787	Down
mmu-miR-34c-3p	UP	Cfb	Down
mmu-miR-34c-3p	UP	Car9	Down
mmu-miR-34c-3p	UP	Aldh7a1	Down
mmu-miR-701-3p	UP	Xylb	Down
mmu-miR-701-3p	UP	Ttc25	Down
mmu-miR-701-3p	UP	Them7	Down
mmu-miR-701-3p	UP	Slc5a4a	Down
mmu-miR-701-3p	UP	Slc4a4	Down
mmu-miR-701-3p	UP	Slc25a19	Down
mmu-miR-701-3p	UP	Prlr	Down
mmu-miR-701-3p	UP	Hlf	Down
mmu-miR-701-3p	UP	Galnt1	Down
mmu-miR-701-3p	UP	Egf	Down
mmu-miR-701-3p	UP	Chrna4	Down
mmu-miR-701-3p	UP	B4galt5	Down
mmu-miR-701-3p	UP	Acox3	Down
mmu-miR-143-5p	UP	Tsku	Down
mmu-miR-143-5p	UP	Tmprss9	Down
mmu-miR-143-5p	UP	Snx27	Down
mmu-miR-143-5p	UP	R3hdml	Down
mmu-miR-143-5p	UP	Pcsk5	Down
mmu-miR-143-5p	UP	Osbpl9	Down
mmu-miR-143-5p	UP	Gm6878	Down
mmu-miR-143-5p	UP	Dnah2	Down
mmu-miR-143-5p	UP	Ap5b1	Down
mmu-miR-143-5p	UP	5830411N06Rik	Down
mmu-miR-2137	UP	Zmynd12	Down
mmu-miR-2137	UP	Whrn	Down
mmu-miR-2137	UP	Rmdn3	Down
mmu-miR-2137	UP	Ralgapa2	Down
mmu-miR-2137	UP	Pcdh17	Down
mmu-miR-2137	UP	Lrrc8b	Down
mmu-miR-2137	UP	Klhl32	Down
mmu-miR-2137	UP	Kcp	Down
mmu-miR-2137	UP	Ankib1	Down
mmu-miR-511-3p	UP	Tmc3	Down
mmu-miR-511-3p	UP	Rbm47	Down
mmu-miR-511-3p	UP	Ppp1r16a	Down
mmu-miR-511-3p	UP	Nadsyn1	Down
mmu-miR-511-3p	UP	Gm5424	Down
mmu-miR-511-3p	UP	Erich6b	Down
mmu-miR-182-3p	UP	Slc1a2	Down
mmu-miR-182-3p	UP	Pccb	Down
mmu-miR-182-3p	UP	Nubpl	Down
mmu-miR-182-3p	UP	Lpin1	Down
mmu-miR-182-3p	UP	Gpr155	Down
mmu-miR-182-3p	UP	Fut8	Down
mmu-miR-182-3p	UP	Ceacam2	Down
mmu-miR-298-5p	UP	Xylb	Down
mmu-miR-298-5p	UP	Whrn	Down
mmu-miR-298-5p	UP	Spry3	Down
mmu-miR-298-5p	UP	Slc35d2	Down
mmu-miR-298-5p	UP	Slc25a42	Down
mmu-miR-298-5p	UP	Osbpl8	Down
mmu-miR-298-5p	UP	Neurl4	Down
mmu-miR-298-5p	UP	Maf	Down
mmu-miR-298-5p	UP	Arhgef39	Down
mmu-miR-410-3p	UP	Wnk2	Down
mmu-miR-410-3p	UP	Vnn1	Down
mmu-miR-410-3p	UP	Ppa2	Down
mmu-miR-410-3p	UP	Plekha8	Down
mmu-miR-410-3p	UP	Oxgr1	Down
mmu-miR-410-3p	UP	Lrrk2	Down
mmu-miR-410-3p	UP	Lrrc55	Down
mmu-miR-410-3p	UP	Erich6b	Down
mmu-miR-410-3p	UP	Dnah5	Down
mmu-miR-410-3p	UP	Csrnp3	Down
mmu-miR-3110-5p	UP	Slc25a34	Down
mmu-miR-3110-5p	UP	Slc13a5	Down
mmu-miR-3110-5p	UP	Sec14l3	Down
mmu-miR-3110-5p	UP	Prkcz	Down
mmu-miR-3110-5p	UP	Pnpla1	Down
mmu-miR-3110-5p	UP	Nlrc4	Down
mmu-miR-3110-5p	UP	Mtus1	Down
mmu-miR-3110-5p	UP	Glyctk	Down
mmu-miR-3110-5p	UP	Dhrs4	Down
mmu-miR-3110-5p	UP	Ccdc108	Down
mmu-miR-3110-5p	UP	Ankrd13c	Down
mmu-miR-3110-5p	UP	Acmsd	Down
mmu-miR-21a-3p	UP	Trabd2b	Down
mmu-miR-21a-3p	UP	Slc39a5	Down
mmu-miR-21a-3p	UP	Pi4ka	Down
mmu-miR-21a-3p	UP	Myom3	Down
mmu-miR-21a-3p	UP	Lpin1	Down
mmu-miR-21a-3p	UP	Dnah2	Down
mmu-miR-21a-3p	UP	Cluh	Down
mmu-miR-21a-3p	UP	Cdhr5	Down
mmu-miR-21a-3p	UP	Cd36	Down
mmu-miR-21a-3p	UP	Ccdc107	Down
mmu-miR-466p-3p	UP	Tbc1d13	Down
mmu-miR-466p-3p	UP	Rgl1	Down
mmu-miR-466p-3p	UP	Dnajc19	Down
mmu-miR-206-3p	UP	Slc25a13	Down
mmu-miR-206-3p	UP	Gm3716	Down
mmu-miR-206-3p	UP	Dnajc13	Down
mmu-miR-206-3p	UP	Csrnp3	Down
mmu-miR-6994-3p	UP	Upb1	Down
mmu-miR-6994-3p	UP	Ttc41	Down
mmu-miR-6994-3p	UP	Pdss2	Down
mmu-miR-6994-3p	UP	Oxct2a	Down
mmu-miR-6994-3p	UP	Mtg2	Down
mmu-miR-6994-3p	UP	C8a	Down
mmu-miR-6994-3p	UP	Brap	Down
mmu-miR-6994-3p	UP	Aacs	Down
mmu-miR-34b-5p	UP	Snx7	Down
mmu-miR-34b-5p	UP	Nrap	Down
mmu-miR-34b-5p	UP	Nat8f2	Down
mmu-miR-34b-5p	UP	Kcnc3	Down
mmu-miR-34b-5p	UP	Ddo	Down
mmu-miR-34b-5p	UP	Apol7c	Down
mmu-miR-431-5p	UP	Tmco3	Down
mmu-miR-431-5p	UP	Peli2	Down
mmu-miR-431-5p	UP	Nadsyn1	Down
mmu-miR-431-5p	UP	Me1	Down
mmu-miR-431-5p	UP	Grin3a	Down
mmu-miR-431-5p	UP	Gfra1	Down
mmu-miR-431-5p	UP	B3galt5	Down
mmu-miR-431-5p	UP	Ap5b1	Down
mmu-miR-431-5p	UP	Actrt3	Down
mmu-miR-541-5p	UP	Ugt2b38	Down
mmu-miR-541-5p	UP	Slc17a1	Down
mmu-miR-541-5p	UP	Lpin1	Down
mmu-miR-541-5p	UP	Gfm2	Down
mmu-miR-541-5p	UP	Cldn2	Down
mmu-miR-541-5p	UP	Ankib1	Down
mmu-miR-541-5p	UP	Aldh16a1	Down
mmu-miR-3071-3p	UP	Slc10a2	Down
mmu-miR-3071-3p	UP	Ptgr2	Down
mmu-miR-3071-3p	UP	Pla2g6	Down
mmu-miR-3071-3p	UP	Lrriq3	Down
mmu-miR-3071-3p	UP	Lace1	Down
mmu-miR-3071-3p	UP	F5	Down
mmu-miR-3071-3p	UP	E330009J07Rik	Down
mmu-miR-3071-3p	UP	Dusp9	Down
mmu-miR-3071-3p	UP	Add3	Down
mmu-miR-3071-3p	UP	4930451G09Rik	Down
mmu-miR-3071-3p	UP	2500002B13Rik	Down
mmu-miR-667-3p	UP	Sufu	Down
mmu-miR-667-3p	UP	Slc25a42	Down
mmu-miR-667-3p	UP	Lclat1	Down
mmu-miR-667-3p	UP	Gucy2f	Down
mmu-miR-667-3p	UP	Dock9	Down
mmu-miR-667-3p	UP	D130043K22Rik	Down
mmu-miR-154-3p	UP	Tmprss9	Down
mmu-miR-154-3p	UP	Tmem254a	Down
mmu-miR-154-3p	UP	Syt1	Down
mmu-miR-154-3p	UP	Osbpl8	Down
mmu-miR-154-3p	UP	Hao2	Down
mmu-miR-154-3p	UP	Gm16861	Down
mmu-miR-154-3p	UP	Dmtn	Down
mmu-miR-154-3p	UP	Cmbl	Down
mmu-miR-154-3p	UP	B4galt5	Down
mmu-miR-154-3p	UP	Acvr2b	Down
mmu-miR-380-3p	UP	Wwp1	Down
mmu-miR-380-3p	UP	Wnt11	Down
mmu-miR-380-3p	UP	Vwa2	Down
mmu-miR-380-3p	UP	Tefm	Down
mmu-miR-380-3p	UP	Tanc2	Down
mmu-miR-380-3p	UP	Slc39a11	Down
mmu-miR-380-3p	UP	Phyhd1	Down
mmu-miR-380-3p	UP	Clcn3	Down
mmu-miR-380-3p	UP	Bnc2	Down
mmu-miR-380-3p	UP	Aqp11	Down
mmu-miR-380-3p	UP	Acss3	Down
mmu-miR-155-3p	UP	Zc2hc1c	Down
mmu-miR-155-3p	UP	Wwp1	Down
mmu-miR-155-3p	UP	Slc1a7	Down
mmu-miR-155-3p	UP	Slc12a7	Down
mmu-miR-155-3p	UP	Rhov	Down
mmu-miR-155-3p	UP	Gatsl2	Down
mmu-miR-155-3p	UP	B930092H01Rik	Down
mmu-miR-155-3p	UP	Abhd18	Down
mmu-miR-155-3p	UP	4931408D14Rik	Down
mmu-miR-434-3p	UP	Slc13a2os	Down
mmu-miR-434-3p	UP	Nxpe3	Down
mmu-miR-434-3p	UP	Gm15441	Down
mmu-miR-434-3p	UP	Gcat	Down
mmu-miR-434-3p	UP	Adap2	Down
mmu-miR-223-5p	UP	Smpd2	Down
mmu-miR-223-5p	UP	Slc4a9	Down
mmu-miR-223-5p	UP	Sec14l3	Down
mmu-miR-223-5p	UP	Olfm3	Down
mmu-miR-223-5p	UP	Neurog2	Down
mmu-miR-223-5p	UP	Myrfl	Down
mmu-miR-223-5p	UP	Mfap3l	Down
mmu-miR-223-5p	UP	Me1	Down
mmu-miR-223-5p	UP	Kcnj3	Down
mmu-miR-223-5p	UP	Itgae	Down
mmu-miR-223-5p	UP	Gm11127	Down
mmu-miR-223-5p	UP	Aldh5a1	Down
mmu-miR-223-5p	UP	9030617O03Rik	Down
mmu-miR-34b-3p	UP	Uroc1	Down
mmu-miR-34b-3p	UP	Slc5a6	Down
mmu-miR-34b-3p	UP	Slc22a23	Down
mmu-miR-34b-3p	UP	Myh14	Down
mmu-miR-34b-3p	UP	Iqsec2	Down
mmu-miR-34b-3p	UP	Hmgcr	Down
mmu-miR-34b-3p	UP	Gm6300	Down
mmu-miR-34b-3p	UP	Fam126b	Down
mmu-miR-34b-3p	UP	Ces1e	Down
mmu-miR-34b-3p	UP	Adamtsl3	Down
mmu-miR-34b-3p	UP	Acnat1	Down
mmu-miR-34b-3p	UP	Abcg8	Down
mmu-miR-299a-5p	UP	Slco1a1	Down
mmu-miR-299a-5p	UP	Rreb1	Down
mmu-miR-299a-5p	UP	Rnf32	Down
mmu-miR-299a-5p	UP	Pipox	Down
mmu-miR-299a-5p	UP	Glb1	Down
mmu-miR-299a-5p	UP	Erlin1	Down
mmu-miR-299a-5p	UP	Bnc2	Down
mmu-miR-511-5p	UP	Pax9	Down
mmu-miR-511-5p	UP	Mtg2	Down
mmu-miR-511-5p	UP	Lrtm1	Down
mmu-miR-511-5p	UP	1700030J22Rik	Down
mmu-miR-31-5p	UP	Tulp3	Down
mmu-miR-31-5p	UP	Slc22a23	Down
mmu-miR-31-5p	UP	Nphp1	Down
mmu-miR-31-5p	UP	Hus1	Down
mmu-miR-31-5p	UP	Htt	Down
mmu-miR-31-5p	UP	AI464131	Down
mmu-miR-31-5p	UP	Abcc6	Down
mmu-miR-300-3p	UP	Rundc3b	Down
mmu-miR-300-3p	UP	Rd3	Down
mmu-miR-300-3p	UP	Gm15348	Down
mmu-miR-300-3p	UP	Cox15	Down
mmu-miR-300-3p	UP	9030617O03Rik	Down
mmu-miR-433-3p	UP	Tyw3	Down
mmu-miR-433-3p	UP	Tpk1	Down
mmu-miR-433-3p	UP	Slc30a2	Down
mmu-miR-433-3p	UP	Pter	Down
mmu-miR-433-3p	UP	Nipsnap1	Down
mmu-miR-433-3p	UP	Cpeb3	Down
mmu-miR-1193-3p	UP	Zmynd10	Down
mmu-miR-1193-3p	UP	Tysnd1	Down
mmu-miR-1193-3p	UP	Ryr2	Down
mmu-miR-1193-3p	UP	Reps2	Down
mmu-miR-1193-3p	UP	Pank1	Down
mmu-miR-1193-3p	UP	Eml5	Down
mmu-miR-1193-3p	UP	Airn	Down
mmu-miR-212-3p	UP	Ttc38	Down
mmu-miR-212-3p	UP	Sez6l	Down
mmu-miR-212-3p	UP	Mfsd4b3	Down
mmu-miR-212-3p	UP	Hps3	Down
mmu-miR-212-3p	UP	Gfra1	Down
mmu-miR-212-3p	UP	Fn3k	Down
mmu-miR-212-3p	UP	Dynll2	Down
mmu-miR-212-3p	UP	Dlg2	Down
mmu-miR-212-3p	UP	Clcn5	Down
mmu-miR-212-3p	UP	Aldh7a1	Down
mmu-miR-212-3p	UP	Agmat	Down
mmu-miR-212-3p	UP	Ace2	Down
mmu-miR-369-3p	UP	Xpnpep3	Down
mmu-miR-369-3p	UP	Ugt3a2	Down
mmu-miR-369-3p	UP	Slc7a9	Down
mmu-miR-369-3p	UP	Mfsd1	Down
mmu-miR-369-3p	UP	Magi2	Down
mmu-miR-369-3p	UP	Fam188b	Down
mmu-miR-369-3p	UP	Erich6b	Down
mmu-miR-369-3p	UP	Entpd5	Down
mmu-miR-369-3p	UP	Dhfr	Down
mmu-miR-369-3p	UP	Angptl7	Down
mmu-miR-369-3p	UP	Abcg2	Down
mmu-let-7a-1-3p	DOWN	Rrm1	Up
mmu-let-7a-1-3p	DOWN	Pinx1	Up
mmu-let-7a-1-3p	DOWN	Ncam1	Up
mmu-let-7a-1-3p	DOWN	Gjc1	Up
mmu-let-7a-1-3p	DOWN	Gdf15	Up
mmu-let-7a-1-3p	DOWN	F3	Up
mmu-let-7a-1-3p	DOWN	Ctsc	Up
mmu-let-7a-1-3p	DOWN	Cnn1	Up
mmu-let-7a-1-3p	DOWN	Arhgap25	Up
mmu-miR-486a-5p	DOWN	Sirpb1b	Up
mmu-miR-486a-5p	DOWN	Psrc1	Up
mmu-miR-486a-5p	DOWN	Prrx1	Up
mmu-miR-486a-5p	DOWN	Nova2	Up
mmu-miR-486a-5p	DOWN	Liph	Up
mmu-miR-486a-5p	DOWN	Islr	Up
mmu-miR-486a-5p	DOWN	Gucy1a2	Up
mmu-miR-486a-5p	DOWN	Fndc1	Up
mmu-miR-486a-5p	DOWN	Dpcr1	Up
mmu-miR-547-3p	DOWN	Zfp385a	Up
mmu-miR-547-3p	DOWN	Tlr13	Up
mmu-miR-547-3p	DOWN	Ret	Up
mmu-miR-547-3p	DOWN	Rarb	Up
mmu-miR-547-3p	DOWN	Rab31	Up
mmu-miR-547-3p	DOWN	Psd3	Up
mmu-miR-547-3p	DOWN	Dmkn	Up
mmu-miR-187-3p	DOWN	Sh3pxd2a	Up
mmu-miR-187-3p	DOWN	Rbms3	Up
mmu-miR-187-3p	DOWN	Plekhg1	Up
mmu-miR-187-3p	DOWN	Pdlim7	Up
mmu-miR-187-3p	DOWN	Nnmt	Up
mmu-miR-187-3p	DOWN	Klc3	Up
mmu-miR-187-3p	DOWN	Fbn1	Up
mmu-miR-187-3p	DOWN	Clca3a1	Up
mmu-miR-187-3p	DOWN	Blnk	Up
mmu-miR-187-3p	DOWN	Angptl8	Up
mmu-miR-499-5p	DOWN	Serpinh1	Up
mmu-miR-499-5p	DOWN	Sash3	Up
mmu-miR-499-5p	DOWN	Mybl1	Up
mmu-miR-499-5p	DOWN	Lmod1	Up
mmu-miR-499-5p	DOWN	Fscn2	Up
mmu-miR-499-5p	DOWN	Foxd2os	Up
mmu-miR-499-5p	DOWN	Emilin1	Up
mmu-miR-499-5p	DOWN	Csf1	Up
mmu-miR-499-5p	DOWN	Clec4a2	Up
mmu-miR-499-5p	DOWN	Cldn7	Up
mmu-miR-499-5p	DOWN	Cav2	Up
mmu-miR-499-5p	DOWN	Atp8b1	Up
mmu-miR-190a-3p	DOWN	Slc2a1	Up
mmu-miR-190a-3p	DOWN	Slc27a6	Up
mmu-miR-190a-3p	DOWN	Shcbp1	Up
mmu-miR-190a-3p	DOWN	Prrx1	Up
mmu-miR-190a-3p	DOWN	Plek	Up
mmu-miR-190a-3p	DOWN	Kctd4	Up
mmu-miR-190a-3p	DOWN	Itgbl1	Up
mmu-miR-190a-3p	DOWN	Gzmm	Up
mmu-miR-190a-3p	DOWN	Flna	Up
mmu-miR-190a-3p	DOWN	Fbln2	Up
mmu-miR-190a-3p	DOWN	Arid5a	Up
mmu-miR-190a-3p	DOWN	Adamts10	Up
mmu-miR-190a-3p	DOWN	Adam23	Up
mmu-miR-190a-3p	DOWN	A430105I19Rik	Up
mmu-miR-669o-3p	DOWN	Runx2	Up
mmu-miR-669o-3p	DOWN	Ptpre	Up
mmu-miR-669o-3p	DOWN	Ptpn18	Up
mmu-miR-669o-3p	DOWN	Pcdh19	Up
mmu-miR-669o-3p	DOWN	Fzd2	Up
mmu-miR-669o-3p	DOWN	Dnmt3l	Up
mmu-miR-669o-3p	DOWN	Col8a2	Up
mmu-miR-7085-3p	DOWN	Ypel4	Up
mmu-miR-7085-3p	DOWN	Tmem240	Up
mmu-miR-7085-3p	DOWN	Syndig1	Up
mmu-miR-7085-3p	DOWN	Specc1	Up
mmu-miR-7085-3p	DOWN	Rusc1	Up
mmu-miR-7085-3p	DOWN	Rbfox3	Up
mmu-miR-7085-3p	DOWN	Prrt2	Up
mmu-miR-7085-3p	DOWN	Nin	Up
mmu-miR-7085-3p	DOWN	Lmna	Up
mmu-miR-7085-3p	DOWN	Lif	Up
mmu-miR-7085-3p	DOWN	Htra3	Up
mmu-miR-7085-3p	DOWN	Flnc	Up
mmu-miR-7085-3p	DOWN	Fat3	Up
mmu-miR-7085-3p	DOWN	Dusp5	Up
mmu-miR-7085-3p	DOWN	Dpcr1	Up
mmu-miR-7085-3p	DOWN	Dbndd2	Up
mmu-miR-7085-3p	DOWN	Angptl8	Up
mmu-miR-3475-3p	DOWN	Zbtb42	Up
mmu-miR-3475-3p	DOWN	Themis2	Up
mmu-miR-3475-3p	DOWN	Mtcl1	Up
mmu-miR-3475-3p	DOWN	Lrrc32	Up
mmu-miR-3475-3p	DOWN	Lif	Up
mmu-miR-3475-3p	DOWN	Hmcn1	Up
mmu-miR-3475-3p	DOWN	Hhipl1	Up
mmu-miR-3475-3p	DOWN	Fam83e	Up
mmu-miR-3475-3p	DOWN	Col18a1	Up
mmu-miR-3475-3p	DOWN	Atp8b2	Up
mmu-miR-466e-3p	DOWN	Pik3cd	Up
mmu-miR-466e-3p	DOWN	Loxl3	Up
mmu-miR-466e-3p	DOWN	Igsf9b	Up
mmu-miR-466e-3p	DOWN	Gucy1b3	Up
mmu-miR-466e-3p	DOWN	Chek1	Up
mmu-miR-466e-3p	DOWN	B3galt1	Up
mmu-miR-466e-3p	DOWN	Adamts4	Up
mmu-miR-466e-3p	DOWN	6030408B16Rik	Up
mmu-miR-190a-5p	DOWN	Smpdl3b	Up
mmu-miR-190a-5p	DOWN	Slc2a10	Up
mmu-miR-190a-5p	DOWN	Pls3	Up
mmu-miR-190a-5p	DOWN	Pak3	Up
mmu-miR-190a-5p	DOWN	Olfml2b	Up
mmu-miR-190a-5p	DOWN	Mybl1	Up
mmu-miR-190a-5p	DOWN	Grhl1	Up
mmu-miR-190a-5p	DOWN	Fat3	Up
mmu-miR-190a-5p	DOWN	Eda2r	Up
mmu-miR-190a-5p	DOWN	Dnmt3b	Up
mmu-miR-190a-5p	DOWN	Dctd	Up
mmu-miR-190a-5p	DOWN	Cntn1	Up
mmu-miR-365-2-5p	DOWN	Zfp575	Up
mmu-miR-365-2-5p	DOWN	Trim72	Up
mmu-miR-365-2-5p	DOWN	Tmod2	Up
mmu-miR-365-2-5p	DOWN	Stox2	Up
mmu-miR-365-2-5p	DOWN	Slc9a5	Up
mmu-miR-365-2-5p	DOWN	Prickle2	Up
mmu-miR-365-2-5p	DOWN	Pram1	Up
mmu-miR-365-2-5p	DOWN	Pak6	Up
mmu-miR-365-2-5p	DOWN	Nckap5l	Up
mmu-miR-365-2-5p	DOWN	Mki67	Up
mmu-miR-365-2-5p	DOWN	Ldb3	Up
mmu-miR-365-2-5p	DOWN	Kntc1	Up
mmu-miR-365-2-5p	DOWN	Itpripl2	Up
mmu-miR-365-2-5p	DOWN	Gpr161	Up
mmu-miR-365-2-5p	DOWN	Flnc	Up
mmu-miR-365-2-5p	DOWN	Fbxw10	Up
mmu-miR-365-2-5p	DOWN	Ehbp1l1	Up
mmu-miR-365-2-5p	DOWN	Adgrg6	Up
mmu-miR-122-5p	DOWN	Xirp2	Up
mmu-miR-122-5p	DOWN	Wfdc1	Up
mmu-miR-122-5p	DOWN	Vav3	Up
mmu-miR-122-5p	DOWN	Tgif2	Up
mmu-miR-122-5p	DOWN	Slc7a1	Up
mmu-miR-122-5p	DOWN	Slc15a3	Up
mmu-miR-122-5p	DOWN	Pakap	Up
mmu-miR-122-5p	DOWN	Mlkl	Up
mmu-miR-122-5p	DOWN	Mapkapk3	Up
mmu-miR-122-5p	DOWN	Kcns3	Up
mmu-miR-122-5p	DOWN	Gpm6b	Up
mmu-miR-122-5p	DOWN	Cxcl3	Up
mmu-miR-122-5p	DOWN	Cilp	Up
mmu-miR-122-5p	DOWN	Camk2d	Up
mmu-miR-1968-3p	DOWN	Unc13d	Up
mmu-miR-1968-3p	DOWN	Trim72	Up
mmu-miR-1968-3p	DOWN	Nrp2	Up
mmu-miR-1968-3p	DOWN	Itgb4	Up
mmu-miR-1968-3p	DOWN	Gpc6	Up
mmu-miR-1968-3p	DOWN	Fat1	Up
mmu-miR-1968-3p	DOWN	Evi2a	Up
mmu-miR-1968-3p	DOWN	Cdsn	Up
mmu-miR-1968-3p	DOWN	Atp8b1	Up
mmu-miR-7240-5p	DOWN	Trim6	Up
mmu-miR-7240-5p	DOWN	Tcf7l1	Up
mmu-miR-7240-5p	DOWN	Smurf1	Up
mmu-miR-7240-5p	DOWN	Pwwp2b	Up
mmu-miR-7240-5p	DOWN	Plekhg1	Up
mmu-miR-7240-5p	DOWN	Nin	Up
mmu-miR-7240-5p	DOWN	Lrrc32	Up
mmu-miR-7240-5p	DOWN	Kif1a	Up
mmu-miR-7240-5p	DOWN	Csf1	Up
mmu-miR-7240-5p	DOWN	Cdca2	Up
mmu-miR-7240-5p	DOWN	Catip	Up
mmu-miR-7240-5p	DOWN	Agap2	Up
mmu-miR-3099-3p	DOWN	Tnfrsf9	Up
mmu-miR-3099-3p	DOWN	Sytl2	Up
mmu-miR-3099-3p	DOWN	Samd4	Up
mmu-miR-3099-3p	DOWN	Rad54b	Up
mmu-miR-3099-3p	DOWN	Penk	Up
mmu-miR-3099-3p	DOWN	Nckap5l	Up
mmu-miR-3099-3p	DOWN	Lmna	Up
mmu-miR-3099-3p	DOWN	Dpysl3	Up
mmu-miR-3099-3p	DOWN	Col18a1	Up
mmu-miR-486b-3p	DOWN	Trp53i11	Up
mmu-miR-486b-3p	DOWN	Pitpnm3	Up
mmu-miR-486b-3p	DOWN	Pik3cd	Up
mmu-miR-486b-3p	DOWN	Pak6	Up
mmu-miR-486b-3p	DOWN	Mbp	Up
mmu-miR-486b-3p	DOWN	Map6	Up
mmu-miR-486b-3p	DOWN	Klrg2	Up
mmu-miR-486b-3p	DOWN	Il20rb	Up
mmu-miR-486b-3p	DOWN	Dscaml1	Up
mmu-miR-486b-3p	DOWN	C77080	Up
mmu-miR-466b-3p	DOWN	Tlr4	Up
mmu-miR-466b-3p	DOWN	Pik3cd	Up
mmu-miR-466b-3p	DOWN	Pid1	Up
mmu-miR-466b-3p	DOWN	Loxl3	Up
mmu-miR-466b-3p	DOWN	Igsf9b	Up
mmu-miR-466b-3p	DOWN	Chek1	Up
mmu-miR-466b-3p	DOWN	B3galt1	Up
mmu-miR-466b-3p	DOWN	6030408B16Rik	Up
mmu-miR-363-3p	DOWN	Rbfox2	Up
mmu-miR-363-3p	DOWN	Lox	Up
mmu-miR-363-3p	DOWN	Leprot	Up
mmu-miR-363-3p	DOWN	Lepr	Up
mmu-miR-363-3p	DOWN	Htr3a	Up
mmu-miR-363-3p	DOWN	Dysf	Up
mmu-miR-363-3p	DOWN	Col4a1	Up
mmu-miR-363-3p	DOWN	Camk2a	Up
mmu-miR-363-3p	DOWN	Bmf	Up
mmu-miR-363-3p	DOWN	Adgrg2	Up
mmu-miR-187-5p	DOWN	Zak	Up
mmu-miR-187-5p	DOWN	Unc13d	Up
mmu-miR-187-5p	DOWN	Syndig1	Up
mmu-miR-187-5p	DOWN	Slc7a1	Up
mmu-miR-187-5p	DOWN	Mmp28	Up
mmu-miR-187-5p	DOWN	Kif2c	Up
mmu-miR-187-5p	DOWN	Gpsm1	Up
mmu-miR-187-5p	DOWN	Cp	Up
mmu-miR-187-5p	DOWN	Cbln2	Up
mmu-miR-187-5p	DOWN	Adam12	Up
mmu-miR-346-5p	DOWN	Themis2	Up
mmu-miR-346-5p	DOWN	Specc1	Up
mmu-miR-346-5p	DOWN	Samd4	Up
mmu-miR-346-5p	DOWN	Qsox1	Up
mmu-miR-346-5p	DOWN	Pinlyp	Up
mmu-miR-346-5p	DOWN	Pecam1	Up
mmu-miR-346-5p	DOWN	Mlf1	Up
mmu-miR-346-5p	DOWN	Brsk1	Up
mmu-miR-346-5p	DOWN	Acsl4	Up
mmu-miR-1948-3p	DOWN	Zfp185	Up
mmu-miR-1948-3p	DOWN	Trp63	Up
mmu-miR-1948-3p	DOWN	Rbms3	Up
mmu-miR-1948-3p	DOWN	Psd3	Up
mmu-miR-1948-3p	DOWN	Orai2	Up
mmu-miR-1948-3p	DOWN	Man1c1	Up
mmu-miR-1948-3p	DOWN	Lamb2	Up
mmu-miR-1948-3p	DOWN	Jak3	Up
mmu-miR-1948-3p	DOWN	Icam1	Up
mmu-miR-1948-3p	DOWN	Cldn19	Up
mmu-miR-1948-3p	DOWN	Ahnak	Up
mmu-miR-1948-3p	DOWN	4833428L15Rik	Up
mmu-miR-1968-5p	DOWN	Zfp575	Up
mmu-miR-1968-5p	DOWN	Ypel2	Up
mmu-miR-1968-5p	DOWN	Tmem158	Up
mmu-miR-1968-5p	DOWN	Tmem151b	Up
mmu-miR-1968-5p	DOWN	Pwwp2b	Up
mmu-miR-1968-5p	DOWN	Pram1	Up
mmu-miR-1968-5p	DOWN	Krt83	Up
mmu-miR-1968-5p	DOWN	Grhl3	Up
mmu-miR-1968-5p	DOWN	Fam83e	Up
mmu-miR-1968-5p	DOWN	Espl1	Up
mmu-miR-1968-5p	DOWN	Catip	Up
mmu-miR-1968-5p	DOWN	Agap2	Up
mmu-miR-1968-5p	DOWN	Adgrg6	Up
mmu-miR-7085-5p	DOWN	Treml2	Up
mmu-miR-7085-5p	DOWN	Slc22a15	Up
mmu-miR-7085-5p	DOWN	Ntrk2	Up
mmu-miR-7085-5p	DOWN	Npcd	Up
mmu-miR-7085-5p	DOWN	Nckap5l	Up
mmu-miR-7085-5p	DOWN	Mbp	Up
mmu-miR-7085-5p	DOWN	Lif	Up
mmu-miR-7085-5p	DOWN	Il4ra	Up
mmu-miR-7085-5p	DOWN	Hmga1	Up
mmu-miR-7085-5p	DOWN	Adgrf3	Up
mmu-miR-669c-5p	DOWN	Stx11	Up
mmu-miR-669c-5p	DOWN	Samd4	Up
mmu-miR-669c-5p	DOWN	Reep4	Up
mmu-miR-669c-5p	DOWN	Psd4	Up
mmu-miR-669c-5p	DOWN	Nrcam	Up
mmu-miR-669c-5p	DOWN	Nos3	Up
mmu-miR-669c-5p	DOWN	Loxl2	Up
mmu-miR-669c-5p	DOWN	Klf6	Up
mmu-miR-669c-5p	DOWN	Gm14005	Up
mmu-miR-669c-5p	DOWN	Gli3	Up
mmu-miR-669c-5p	DOWN	Fxyd1	Up
mmu-miR-669c-5p	DOWN	Aspm	Up
mmu-miR-669c-5p	DOWN	Ankle1	Up
mmu-miR-669c-5p	DOWN	Agap2	Up
mmu-miR-3073a-3p	DOWN	S100a13	Up
mmu-miR-3073a-3p	DOWN	Pcdhgc3	Up
mmu-miR-3073a-3p	DOWN	Nupr1	Up
mmu-miR-3073a-3p	DOWN	Medag	Up
mmu-miR-3073a-3p	DOWN	Itga2	Up
mmu-miR-3073a-3p	DOWN	Fbln2	Up
mmu-miR-92a-2-5p	DOWN	Zfp57	Up
mmu-miR-92a-2-5p	DOWN	Trim6	Up
mmu-miR-92a-2-5p	DOWN	Specc1	Up
mmu-miR-92a-2-5p	DOWN	Slc16a3	Up
mmu-miR-92a-2-5p	DOWN	Shc2	Up
mmu-miR-92a-2-5p	DOWN	Rarg	Up
mmu-miR-92a-2-5p	DOWN	Ppp1r13l	Up
mmu-miR-92a-2-5p	DOWN	Plekhn1	Up
mmu-miR-92a-2-5p	DOWN	Pik3cd	Up
mmu-miR-92a-2-5p	DOWN	Npcd	Up
mmu-miR-92a-2-5p	DOWN	Nova2	Up
mmu-miR-92a-2-5p	DOWN	Nat8l	Up
mmu-miR-92a-2-5p	DOWN	Mex3a	Up
mmu-miR-92a-2-5p	DOWN	Klrg2	Up
mmu-miR-92a-2-5p	DOWN	Igsf9b	Up
mmu-miR-92a-2-5p	DOWN	Hmga1	Up
mmu-miR-92a-2-5p	DOWN	Hmcn1	Up
mmu-miR-92a-2-5p	DOWN	Hipk4	Up
mmu-miR-92a-2-5p	DOWN	Dnaaf3	Up
mmu-miR-92a-2-5p	DOWN	Agap2	Up
mmu-miR-92a-2-5p	DOWN	Adamts7	Up
mmu-miR-1948-5p	DOWN	Tes	Up
mmu-miR-1948-5p	DOWN	Tcirg1	Up
mmu-miR-1948-5p	DOWN	Stmn2	Up
mmu-miR-1948-5p	DOWN	Slc7a11	Up
mmu-miR-1948-5p	DOWN	Slc34a2	Up
mmu-miR-1948-5p	DOWN	Parvg	Up
mmu-miR-1948-5p	DOWN	Pak3	Up
mmu-miR-1948-5p	DOWN	Liph	Up
mmu-miR-1948-5p	DOWN	Lama5	Up
mmu-miR-1948-5p	DOWN	Klrg2	Up
mmu-miR-1948-5p	DOWN	Gpr173	Up
mmu-miR-1948-5p	DOWN	Gng2	Up
mmu-miR-1948-5p	DOWN	Fam110a	Up
mmu-miR-1948-5p	DOWN	Evi2b	Up
mmu-miR-1948-5p	DOWN	Dkk3	Up
mmu-miR-1948-5p	DOWN	Cntn1	Up
mmu-miR-1948-5p	DOWN	Anxa5	Up
mmu-miR-1948-5p	DOWN	Adam19	Up
mmu-miR-1948-5p	DOWN	4930447K03Rik	Up
mmu-miR-3073b-5p	DOWN	Tcf7l1	Up
mmu-miR-3073b-5p	DOWN	St6galnac4	Up
mmu-miR-3073b-5p	DOWN	Rbfox3	Up
mmu-miR-3073b-5p	DOWN	Rab27b	Up
mmu-miR-3073b-5p	DOWN	Mmp17	Up
mmu-miR-3073b-5p	DOWN	Lamb2	Up
mmu-miR-3073b-5p	DOWN	Il10ra	Up
mmu-miR-3073b-5p	DOWN	Fgfr2	Up
mmu-miR-3073b-3p	DOWN	Tinagl1	Up
mmu-miR-3073b-3p	DOWN	Nusap1	Up
mmu-miR-3073b-3p	DOWN	Nrp2	Up
mmu-miR-3073b-3p	DOWN	Map3k9	Up
mmu-miR-3073b-3p	DOWN	Mal	Up
mmu-miR-3073b-3p	DOWN	Loxl4	Up
mmu-miR-3073b-3p	DOWN	Fbln2	Up
mmu-miR-3073b-3p	DOWN	Dusp5	Up
mmu-miR-3073b-3p	DOWN	Dact3	Up
mmu-miR-3073b-3p	DOWN	Crybb3	Up
mmu-miR-3073b-3p	DOWN	Cers3	Up
mmu-miR-3073b-3p	DOWN	C1qtnf5	Up
mmu-miR-3073b-3p	DOWN	Bcas1	Up
mmu-miR-3073a-5p	DOWN	Ttc9	Up
mmu-miR-3073a-5p	DOWN	Tcf7l1	Up
mmu-miR-3073a-5p	DOWN	Rusc1	Up
mmu-miR-3073a-5p	DOWN	Rab27b	Up
mmu-miR-3073a-5p	DOWN	Pear1	Up
mmu-miR-3073a-5p	DOWN	Liph	Up
mmu-miR-3073a-5p	DOWN	Gvin1	Up
mmu-miR-3073a-5p	DOWN	Flnc	Up
mmu-miR-3073a-5p	DOWN	Adora1	Up
mmu-miR-3073a-5p	DOWN	Adgrd1	Up
mmu-miR-3073a-5p	DOWN	Adamts14	Up
mRNA id
